# Supplementary material
Source: publisher figshare collection journal article supplement (https://springernature.figshare.com/ndownloader/files/31091606)
Supplement: Supplementary file 1 [file 31091606]

## Sheet: README
Additional file 2 to Soininen et al Environmental Evidence -- List of articles
Contains all search results retrieved from the literature searches with information on exclusion stage and (for full text stage) reasons for exclusion, and definitions of variables.
Datasheet	Description
all entries	Contains all search results retrieved from the literature searches
variable information	Contains a description of all column names included in the tab "all entries"
theses	Contains the subset of entries corresponding to theses (BSc, MSc or PhD) and includes information on the type of thesis, university where the thesis was presented and country.
included articles	list of articles (309) included in the systematic map. Some of these articles reported data on several studies. A full list of studies can be found in the ShinyApp

## Sheet: all entries
ID_Eeva	score_1	score_2	score_3	person_1	person_2	person_3	current_score	comments	thesis	duplicate ID	search_source	pdf_stored	coordinates_stored	coordinate_score	full_text_score	full_text_exclusion_reason	full_text_exclusion	full_text_person	data_coded	full_text_person_2	full_text_score_2	Authors	Year	Title	Source.title	Volume	Issue	Page.start	Page.end	DOI	Abstract
1	exclude_title	include	exclude_abstract	OG	KH	DM	exclude_site_coordinates	close to Mongolia!			WoS_Scopus	yes	yes	exclude_site_coordinates								Chytry, M; Horsak, M; Danihelka, J; Ermakov, N; German, DA; Hajek, M; Hajkova, P; Koci, M; Kubesova, S; Lustyk, P; Nekola, JC; Ricankova, VP; Preislerova, Z; Resl, P; Valachovic, M	2019	A modern analogue of the Pleistocene steppe-tundra ecosystem in southern Siberia	BOREAS	48	1	36	56	10.1111/bor.12338	Steppe-tundra is considered to have been a dominant ecosystem across northern Eurasia during the Last Glacial Maximum. As the fossil record is insufficient for understanding the ecology of this vanished ecosystem, modern analogues have been sought, especially in Beringia. However, Beringian ecosystems are probably not the best analogues for more southern variants of the full-glacial steppe-tundra…
2	exclude_title	exclude_title	exclude_abstract	OG	KH	DM	exclude_abstract				WoS_Scopus											Kendrick, MR; Hershey, AE; Huryn, AD	2019	Disturbance, nutrients, and antecedent flow conditions affect macroinvertebrate community structure and productivity in an Arctic river	LIMNOLOGY AND OCEANOGRAPHY	64		S93	S104	10.1002/lno.10942	Climate change is expected to alter disturbance regimes and biogeochemical cycles that underlie the structure and function of ecosystems worldwide. In the Arctic, rapid warming is already affecting these processes via changes in precipitation and thawing permafrost. We assessed how anticipated changes in disturbance regimes and nutrient availability may affect an arctic river ecosystem (Kuparuk R…
3	include	exclude_abstract	include	OG	KH	DM	include				WoS_Scopus	yes	yes	include	include			PM	yes			Leffler, AJ; Beard, KH; Kelsey, KC; Choi, RT; Schmutz, JA; Welker, JM	2019	Delayed herbivory by migratory geese increases summer-long CO2 uptake in coastal western Alaska	GLOBAL CHANGE BIOLOGY	25	1	277	289	10.1111/gcb.14473	The advancement of spring and the differential ability of organisms to respond to changes in plant phenology may lead to "phenological mismatches" as a result of climate change. One potential for considerable mismatch is between migratory birds and food availability in northern breeding ranges, and these mismatches may have consequences for ecosystem function. We conducted a three-year experiment…
4	exclude_title	exclude_abstract	co-author	OG	KH	DM	exclude_abstract			3339	WoS_Scopus											Metcalfe, DB; Cherif, M; Jepsen, JU; Vindstad, OPL; Kristensen, JA; Belsing, U	2019	Ecological stoichiometry and nutrient partitioning in two insect herbivores responsible for large-scale forest disturbance in the Fennoscandian subarctic	ECOLOGICAL ENTOMOLOGY	44	1	118	128	10.1111/een.12679	1. Outbreaks of herbivorous insects can have large impacts on regional soil carbon (C) storage and nutrient cycling. In northernmost Europe, population outbreaks of several geometrid moth species regularly cause large-scale defoliation in subarctic birch forests. An improved understanding is required of how leaf C and nutrients are processed after ingestion by herbivores and what this means for t…
5	exclude_title	exclude_title	exclude_abstract	OG	KH	DM	exclude_abstract				WoS_Scopus											Paar, M; de la Vega, C; Horn, S; Asmus, R; Asmus, H	2019	Kelp belt ecosystem response to a changing environment in Kongsfjorden (Spitsbergen)	OCEAN & COASTAL MANAGEMENT	167		60	77	10.1016/j.ocecoaman.2018.09.003	The reduced sea ice extent and duration in the Arctic releases the rocky shores from one of its key physical disturbances shaping the zonation and depth extension of seaweed assemblages. In order to determine the consequences of reduced disturbance by sea ice, we studied the changes in the functioning and structure of the kelp belt at Hansneset, Kongsfjorden, between 1996-1998 and 2012-2014 using…
6	exclude_title	exclude_abstract	exclude_title	OG	KH	DM	exclude_abstract				WoS_Scopus											Pacyna, AD; Frankowski, M; Koziol, K; Wegrzyn, MH; Wietrzyk-Pelka, P; Lehmann-Konera, S; Polkowska, Z	2019	Evaluation of the use of reindeer droppings for monitoring essential and non-essential elements in the polar terrestrial environment	SCIENCE OF THE TOTAL ENVIRONMENT	658		1209	1218	10.1016/j.scitotenv.2018.12.232	Excess or toxic metals, non-metals and metalloids can be eliminated from the organism by deposition in inert tissue (e.g. fur) or excretion with body secretions, urine and faeces. Droppings are one of the main routes fur the elimination of multiple elements and they can be collected without direct contact with the animal. Contaminant concentration has been examined in non-lethally collected tissu…
7	exclude_title	exclude_title	exclude_title	OG	KH	DM	exclude_title				WoS_Scopus											Sherman, C; Unc, A; Doniger, T; Ehrlich, R; Steinberger, Y	2019	The effect of human trampling activity on a soil microbial community at the Oulanka Natural Reserve, Finland	APPLIED SOIL ECOLOGY	135		104	112	10.1016/j.apsoil.2018.11.013	Functional and taxonomic diversifies of microbial communities in Arctic soils are governed by the extreme abiotic environment and affected by human activities. We assessed the impact of trampling by humans on biotic and abiotic parameters relevant to soil health at the Kiutakongas Trail, Oulanka Nature Park, Finland. Soil was sampled from the 0 to 2 cm, 2 to 5 cm, and 5 to 10 cm layers for four l…
8	exclude_title	exclude_title	exclude_title	OG	KH	DM	exclude_title				WoS_Scopus											Christie H., Bekkby T., Norderhaug K.M., Beyer J., Jørgensen N.M.	2019	Can sea urchin grazing of kelp forests in the Arctic make rocky shore systems more vulnerable to oil spills?	Polar Biology					10.1007/s00300-018-02450-8	In Arctic Norway, the risk of major marine oil spills associated with increasing offshore drilling, land terminal, and maritime transport activities is a cause for concern. Intertidal and subtidal kelp and seaweed communities found in this region are highly productive ecosystems, although sea urchin (Strongylocentrotus droebachiensis)-overgrazed areas (urchin barrens) have been and still are a wi…
9	exclude_title	exclude_title	exclude_title	OG	KH	DM	exclude_title				WoS_Scopus											Lemcke S., Holding J., Møller E.F., Thyrring J., Gustavson K., Juul-Pedersen T., Sejr M.K.	2019	Acute oil exposure reduces physiological process rates in Arctic phyto- and zooplankton	Ecotoxicology	28	1	26	36	10.1007/s10646-018-1995-4	Arctic shipping and oil exploration are expected to increase, as sea ice extent is reduced. This enhances the risk for accidental oil spills throughout the Arctic, which emphasises the need to quantify potential consequences to the marine ecosystem and to evaluate risk and choose appropriate remediation methods. This study investigated the sensitivity of Arctic marine plankton to the water accomm…
10	exclude_title	exclude_title	exclude_abstract	OG	KH	DM	exclude_abstract				WoS_Scopus											Schostag M., Priemé A., Jacquiod S., Russel J., Ekelund F., Jacobsen C.S.	2019	Bacterial and protozoan dynamics upon thawing and freezing of an active layer permafrost soil	ISME Journal					10.1038/s41396-019-0351-x	The active layer of soil overlaying permafrost in the Arctic is subjected to annual changes in temperature and soil chemistry, which we hypothesize to affect the overall soil microbial community. We investigated changes in soil microorganisms at different temperatures during warming and freezing of the active layer soil from Svalbard, Norway. Soil community data were obtained by direct shotgun se…
11	exclude_abstract	exclude_title	exclude_title	OG	KH	DM	exclude_abstract				WoS_Scopus											Simmons B.I., Sweering M.J.M., Schillinger M., Dicks L.V., Sutherland W.J., Di Clemente R.	2019	bmotif: A package for motif analyses of bipartite networks	Methods in Ecology and Evolution					10.1111/2041-210X.13149	Bipartite networks are widely used to represent a diverse range of species interactions, such as pollination, herbivory, parasitism and seed dispersal. The structure of these networks is usually characterised by calculating one or more indices that capture different aspects of network architecture. While these indices capture useful properties of networks, they are relatively insensitive to chang…
12	exclude_title	exclude_abstract	exclude_title	OG	KH	DM	exclude_abstract				WoS_Scopus											Uboni A., Blochel A., Kodnik D., Moen J.	2019	Modelling occurrence and status of mat-forming lichens in boreal forests to assess the past and current quality of reindeer winter pastures	Ecological Indicators	96		99	106	10.1016/j.ecolind.2018.08.008	Lichens play an essential role in northern ecosystems as important contributors to the water, nutrient and carbon cycles, as well as the main winter food resource for reindeer (Rangifer tarandus, also called caribou in North America), the most abundant herbivores in arctic and subarctic regions. Today, climate change and several types of land use are rapidly transforming northern ecosystems and c…
13	include	include	include	OG	KH	DM	exclude_redundant				WoS_Scopus	yes	yes	include	include			PM	yes			Ylänne H., Stark S.	2019	Distinguishing Rapid and Slow C Cycling Feedbacks to Grazing in Sub-arctic Tundra	Ecosystems					10.1007/s10021-018-0329-y	Large grazers are known to affect ecosystem functioning even to the degree where ecosystems transition to another vegetation state. Alongside the vegetation change, several features of ecosystem functioning, such as ecosystem carbon sink capacity and soil carbon mineralisation rates, may be altered. It has remained largely uninvestigated how the grazing effects on carbon cycling processes depend …
14	exclude_title	exclude_title	exclude_title	OG	KH	DM	exclude_title				WoS_Scopus											Alcaman-Arias, ME; Farias, L; Verdugo, J; Alarcon-Schumacher, T; Diez, B	2018	Microbial activity during a coastal phytoplankton bloom on the Western Antarctic Peninsula in late summer	FEMS MICROBIOLOGY LETTERS	365	10			10.1093/femsle/fny090	Phytoplankton biomass during the austral summer is influenced by freezing and melting cycles as well as oceanographic processes that enable nutrient redistribution in the West Antarctic Peninsula (WAP). Microbial functional capabilities, metagenomic and metatranscriptomic activities as well as inorganic C-13-and N-15-assimilation rates were studied in the surface waters of Chile Bay during two co…
15	exclude_abstract	exclude_title	exclude_abstract	OG	KH	DM	exclude_abstract				WoS_Scopus											Andriuzzi, WS; Wall, DH	2018	Soil biological responses to, and feedbacks on, trophic rewilding	PHILOSOPHICAL TRANSACTIONS OF THE ROYAL SOCIETY B-BIOLOGICAL SCIENCES	373	1761			10.1098/rstb.2017.0448	Trophic rewilding-the (re) introduction of missing large herbivores and/or their predators-is increasingly proposed to restore biodiversity and biotic interactions, but its effects on soils have been largely neglected. The high diversity of soil organisms and the ecological functions they perform mean that the full impact of rewilding on ecosystems cannot be assessed considering only above-ground…
16	exclude_title	exclude_title	exclude_title	OG	KH	DM	exclude_title				WoS_Scopus											Ashastina, K; Kuzmina, S; Rudaya, N; Troeva, E; Schoch, WH; Romermann, C; Reinecke, J; Otte, V; Savvinov, G; Wesche, K; Kienast, F	2018	Woodlands and steppes: Pleistocene vegetation in Yakutia's most continental part recorded in the Batagay permafrost sequence	QUATERNARY SCIENCE REVIEWS	196		38	61	10.1016/j.quascirev.2018.07.032	Based on fossil organism remains including plant macrofossils, charcoal, pollen, and invertebrates preserved in syngenetic deposits of the Batagay permafrost sequence in the Siberian Yana Highlands, we reconstructed the environmental history during marine isotope stages (MIS) 6 to 2. Two fossil assemblages, exceptionally rich in plant remains, allowed for a detailed description of the palaeo-vege…
17	exclude_abstract	include	exclude_abstract	OG	KH	DM	exclude_full_text				WoS_Scopus	yes	yes	include	exclude_full_text	Authors studied an effect of fertilization on plant assemblage and arthropod (including herbivores) assemblages. The focus on herbivore community was not as herbivores driving changes in plants.	no_outcome	PM	no			Asmus, A; Koltz, A; McLaren, J; Shaver, GR; Gough, L	2018	Long-term nutrient addition alters arthropod community composition but does not increase total biomass or abundance	OIKOS	127	3	460	471	10.1111/oik.04398	A simple bottom-up hypothesis predicts that plant responses to nutrient addition should determine the response of consumers: more productive and less diverse plant communities, the usual result of long-term nutrient addition, should support greater consumer abundances and biomass and less consumer diversity. We tested this hypothesis for the response of an aboveground arthropod community to an un…
18	exclude_abstract	exclude_abstract	exclude_abstract	OG	KH	DM	exclude_abstract				WoS_Scopus											Asmus, AL; Chmura, HE; Hoye, TT; Krause, JS; Sweet, SK; Perez, JH; Boelman, NT; Wingfield, JC; Gough, L	2018	Shrub shading moderates the effects of weather on arthropod activity in arctic tundra	ECOLOGICAL ENTOMOLOGY	43	5	647	655	10.1111/een.12644	1. Rapid warming has facilitated an increase in deciduous shrub cover in arctic tundra. Because shrubs create a cooler microclimate during the growing season, shrub cover could modulate the effects of global warming on the phenology and activity of ectotherms, including arthropods. This possibility was explored here using two dominant arthropod groups (flies and wolf spiders) in Alaskan tundra. 2…
19	exclude_title	exclude_title	exclude_title	OG	KH	DM	exclude_title				WoS_Scopus											Balaguru, K; Doney, SC; Bianucci, L; Rasch, PJ; Leung, LR; Yoon, JH; Lima, ID	2018	Linking deep convection and phytoplankton blooms in the northern Labrador Sea in a changing climate	PLOS ONE	13	1			10.1371/journal.pone.0191509	Wintertime convective mixing plays a pivotal role in the sub-polar North Atlantic spring phytoplankton blooms by favoring phytoplankton survival in the competition between light-dependent production and losses due to grazing and gravitational settling. We use satellite and ocean reanalyses to show that the area-averaged maximum winter mixed layer depth is positively correlated with April chloroph…
20	exclude_abstract	exclude_abstract	include	OG	KH	DM	exclude_full_text			139	WoS_Scopus	yes	yes	include	exclude_full_text	The studied effect of time (phenology) on forage quality does not include any herbivory treatment or manipulation.	no_comparator	PM	no			Barboza, PS; Van Someren, LL; Gustine, DD; Bret-Harte, MS	2018	The nitrogen window for arctic herbivores: plant phenology and protein gain of migratory caribou (Rangifer tarandus)	ECOSPHERE	9	1			10.1002/ecs2.2073	Terrestrial plants are often limited by nitrogen (N) in arctic systems, but constraints of N supply on herbivores are typically considered secondary to those of energy. We tested the hypothesis that forage N is more limiting than energy for arctic caribou by collecting key forages (three species of graminoids, three species of woody browse, and one genus of forb) over three summers in the migrato…
21	include	include	exclude_title	OG	KH	DM	exclude_full_text	Iceland -- but exclude_full_text because it is not measuring effects of herbivory			WoS_Scopus	yes	yes	exclude_site_coordinates	exclude_full_text	not measuring impacts of herbivory (modelling/conceptual paper)	no_study_design	ICB	no			Barrio, IC; Hik, DS; Thorsson, J; Svavarsdottir, K; Marteinsdottir, B; Jonsdottir, IS	2018	The sheep in wolf's clothing? Recognizing threats for land degradation in Iceland using state-and-transition models	LAND DEGRADATION & DEVELOPMENT	29	6	1714	1725	10.1002/ldr.2978	Land degradation and extensive soil erosion are serious environmental concerns in Iceland. Natural processes associated with a harsh climate and frequent volcanic activity have shaped Icelandic landscapes. However, following human settlement and the introduction of livestock in the ninth century, the extent of soil erosion rapidly escalated. Despite increased restoration and afforestation efforts…
22	include	exclude_abstract	include	OG	KH	DM	remove_duplicate			3325, 140	WoS_Scopus	yes										Barrio, IC; Linden, E; Beest, M; Olofsson, J; Rocha, A; Soininen, EM; Alatalo, JM; Andersson, T; Asmus, A; Boike, J; Brathen, KA; Bryant, JP; Buchwal, A; Bueno, CG; Christie, KS; Denisova, YV; Egelkraut, D; Ehrich, D; Fishback, L; Forbes, BC; Gartzia, M; Grogan, P; Hallinger, M; Heijmans, MMPD; Hik, DS; Hofgaard, A; Holmgren, M; Hoye, TT; Huebner, DC; Jonsdottir, IS; Kaarlejarvi, E; Kumpula, T; L…	2018	Publisher Correction to: Background invertebrate herbivory on dwarf birch (Betula glandulosa-nana complex) increases with temperature and precipitation across the tundra biome (vol 40, pg 2265, 2017)	POLAR BIOLOGY	41	8	1653	1654	10.1007/s00300-018-2305-6	The above mentioned article was originally scheduled for publication in the special issue on Ecology of Tundra Arthropods with guest editors Toke T. Hoye . Lauren E. Culler. Erroneously, the article was published in Polar Biology, Volume 40, Issue 11, November, 2017. The publisher sincerely apologizes to the guest editors and the authors for the inconvenience caused.
23	include	include	include	OG	KH	DM	include			141	WoS_Scopus	yes	yes	include	include			PM	yes			Barthelemy, H; Stark, S; Michelsen, A; Olofsson, J	2018	Urine is an important nitrogen source for plants irrespective of vegetation composition in an Arctic tundra: Insights from a N-15-enriched urea tracer experiment	JOURNAL OF ECOLOGY	106	1	367	378	10.1111/1365-2745.12820	1. Mammalian herbivores can strongly influence nitrogen (N) cycling and herbivore urine could be a central component of the N cycle in grazed ecosystems. Despite its potential role for ecosystem productivity and functioning, the fate of N derived from urine has rarely been investigated in grazed ecosystems. 2. This study explored the fate of N-15-enriched urea in tundra sites that have been eithe…
24	exclude_title	exclude_title	exclude_title	OG	KH	DM	exclude_title				WoS_Scopus											Bitusik, P; Trnkova, K; Chamutiova, T; Sochuliakova, L; Stoklasa, J; Pipik, R; Szarlowicz, K; Szacilowski, G; Thomkova, K; Sporka, F; Starek, D; Surka, J; Milovsky, R; Hamerlik, L	2018	Tracking human impact in a mining landscape using lake sediments: A multi-proxy palaeolimnological study	PALAEOGEOGRAPHY PALAEOCLIMATOLOGY PALAEOECOLOGY	504		23	33	10.1016/j.palaeo.2018.04.021	Mining and metallurgy have caused vast devastation of the landscape in the past and left its legacy on terrestrial and aquatic ecosystems all over the world. Lake sediments provide a continuous record for tracking and better understanding of human-environment interactions related to historical mining and metallurgical activities. Here, we present the analysis of pollen, diatom, cladoceran and chi…
25	include	include	include	OG	KH	DM	include			3340	WoS_Scopus	yes	yes	include	include			PM	yes			Bognounou, F; Hulme, PE; Oksanen, L; Suominen, O; Olofsson, J	2018	Role of climate and herbivory on native and alien conifer seedling recruitment at and above the Fennoscandian tree line	JOURNAL OF VEGETATION SCIENCE	29	4	573	584	10.1111/jvs.12637	QuestionsWe investigated the importance of climate and herbivory on native and alien conifer colonization of the birch-dominated Fennoscandian tree line by addressing the following questions: (a) are tree line and tundra habitats similarly suitable for conifer seedling recruitment; (b) do ungulate and rodent herbivores differentially impact seedling recruitment; and (c) how does the role of habit…
26	include	exclude_abstract	include	OG	KH	DM	include			142	WoS_Scopus	yes	yes	include	include			EMS	yes			Bokhorst, S; Berg, MP; Edvinsen, GK; Ellers, J; Heitman, A; Jaakola, L; Maehre, HK; Phoenix, GK; Tommervik, H; Bjerke, JW	2018	Impact of Multiple Ecological Stressors on a Sub-Arctic Ecosystem: No Interaction Between Extreme Winter Warming Events, Nitrogen Addition and Grazing	FRONTIERS IN PLANT SCIENCE	9				10.3389/fpls.2018.01787	Climate change is one of many ongoing human-induced environmental changes, but few studies consider interactive effects between multiple anthropogenic disturbances. In coastal sub-arctic heathland, we quantified the impact of a factorial design simulating extreme winter warming (WW) events (7 days at 6-7 degrees C) combined with episodic summer nitrogen (+N) depositions (5 kg N ha(-1)) on plant w…
27	exclude_title	exclude_title	exclude_title	OG	KH	DM	exclude_title				WoS_Scopus											Boonstra, R; Dusek, A; Flynn, RW	2018	DHEA and territoriality during the nonbreeding season in male American martens (Martes americana)	JOURNAL OF MAMMALOGY	99	4	826	835	10.1093/jmammal/gyy067	Nonbreeding season territoriality is found in many mammal species irrespective of diet, being found in carnivores, granivores, and herbivores. However, we know the hormonal basis for this behavior in virtually none. American martens (Martes americana) show strong intrasexual, year-round territoriality. We collected serum samples from both territorial and transient males and documented size metric…
28	include	include	include	OG	KH	DM	include			3443	WoS_Scopus	yes	yes	include	include			PM	yes			Brathen, KA; Gonzalez, VT; Yoccoz, NG	2018	Gatekeepers to the effects of climate warming? Niche construction restricts plant community changes along a temperature gradient	PERSPECTIVES IN PLANT ECOLOGY EVOLUTION AND SYSTEMATICS	30		71	81	10.1016/j.ppees.2017.06.005	Organisms that modify the environment (niche constructors) are likely candidates to mediate the effects of climate warming. Here we assess tundra plant community changes along a temperature gradient and how these are modified in the presence of the common allelopathic dwarf shrub Empetrum nigrum and the large herbivore Rangifer tarandus. We developed a structural equation model based on data from…
29	exclude_abstract	exclude_abstract	exclude_abstract	OG	KH	DM	exclude_abstract			143	WoS_Scopus											Buda, J; Olszanowski, Z; Wierzgon, M; Zawierucha, K	2018	Tardigrades and oribatid mites in bryophytes from geothermally active lava fields (Krafla, Iceland) and the description of Pilatobius islandicus sp. nov. (Eutardigrada)	POLISH POLAR RESEARCH	39	3	425	453	10.24425/118755	In polar regions, apart from tundra and glaciers, geothermally active areas with elevated temperatures are important elements of ecosystems. One such geothermally active region characterized by mosaic ecosystems and vast areas covered by recent lava fields is Iceland. The aim of our study was to explore the diversity of invertebrates inhabiting geothermally active lava fields in the Krafla area (…
30	include	include	include	OG	KH	DM	include				WoS_Scopus	yes	yes	include	include			PM	yes			Carlson, LG; Beard, KH; Adler, PB	2018	Direct effects of warming increase woody plant abundance in a subarctic wetland	ECOLOGY AND EVOLUTION	8	5	2868	2879	10.1002/ece3.3902	Both the direct effects of warming on a species' vital rates and indirect effects of warming caused by interactions with neighboring species can influence plant populations. Furthermore, herbivory mediates the effects of warming on plant community composition in many systems. Thus, determining the importance of direct and indirect effects of warming, while considering the role of herbivory, can h…
31	exclude_title	exclude_title	exclude_title	OG	KH	DM	exclude_title				WoS_Scopus											Chen, H; Zhao, XR; Chen, XJ; Lin, QM; Li, GT	2018	Seasonal changes of soil microbial C, N, P and associated nutrient dynamics in a semiarid grassland of north China	APPLIED SOIL ECOLOGY	128		89	97	10.1016/j.apsoil.2018.04.008	Semiarid grasslands are widely distributed in northern China and characterized by marked seasonality. While the role of soil microbes in nutrient cycling is known to be crucial, the nutrient dynamics in relation to changes and turnover of microbial pools over the growth season in semiarid grasslands, are not well understood. In this study, three grasslands with long-term traditional managements (…
32	exclude_title	exclude_title	exclude_title	OG	KH	DM	exclude_title				WoS_Scopus											Cimon, S; Cusson, M	2018	Impact of multiple disturbances and stress on the temporal trajectories and resilience of benthic intertidal communities	ECOSPHERE	9	10			10.1002/ecs2.2467	Coastal ecosystems face severe environmental change and anthropogenic pressures that affect both the structure and functioning of communities. Understanding the response and resilience of communities that face multiple simultaneous disturbances and stresses becomes essential. We observed the recovery of a rocky intertidal subarctic macrobenthic community dominated by a macroalgal canopy (Fucus sp…
33	exclude_title	exclude_title	exclude_title	OG	KH	DM	remove_duplicate			145	WoS_Scopus											Connell, PE; Michel, C; Meisterhans, G; Arrigo, KR; Caron, DA	2018	Phytoplankton and bacterial dynamics on the Chukchi Sea Shelf during the spring-summer transition	MARINE ECOLOGY PROGRESS SERIES	602		49	62	10.3354/meps12692	Climate warming is exerting significant change on the physical properties of the Arctic Ocean, which in turn has marked consequences for the biology of the region. The Chukchi Sea is notable for its species richness as a consequence of a nutrient-rich shelf region that supports substantial primary production. However, little is known about the carbon transformations at the base of the food web in…
34	exclude_title	exclude_title	exclude_title	OG	KH	DM	exclude_title			146	WoS_Scopus											Croitor, R; Obada, T	2018	On the presence of Late Pleistocene wapiti, Cervus canadensis Erxleben, 1777 (Cervidae, iklantinalia) in the Palaeolithic site Climauti II (Moldova)	CONTRIBUTIONS TO ZOOLOGY	87	1	1	10		This article reports antler remains from the Late Paleolithic site of Climauti II (Republic of Moldova) confirming the presence of wapiti Cervus canadensis in the Late Pleistocene of Western Eurasia. The occurrence of wapiti in the East Carpathian area by 20 ky BP coincides with the local extinction of Megaloceros giganteus, Crocutaspelaea, and Ursus spelaeus, and substitution of local forest rei…
35	exclude_title	exclude_abstract	exclude_title	OG	KH	DM	exclude_abstract				WoS_Scopus											Czortek, P; Delimat, A; Dyderski, MK; Zieba, A; Jagodzinski, AM; Jaroszewicz, B	2018	Climate change, tourism and historical grazing influence the distribution of Carex lachenalii Schkuhr - A rare arctic-alpine species in the Tatra Mts	SCIENCE OF THE TOTAL ENVIRONMENT	618		1628	1637	10.1016/j.scitotenv.2017.10.001	Mountain vegetation is highly specialized to harsh climatic conditions and therefore is sensitive to any change in environment. The rarest and most vulnerable plants occurring in alpine regions are expected to respond rapidly to environmental changes. An example of such a species is Carex lachenalii subsp. lachenalii Schkuhr, which occurs in Poland on only a few isolated sites in the Tatra Mts. T…
36	exclude_title	exclude_title	exclude_title	OG	KH	DM	exclude_title				WoS_Scopus											De Leo, FC; Ogata, B; Sastri, AR; Heesemann, M; Mihaly, S; Galbraith, M; Morley, MG	2018	High-frequency observations from a deep-sea cabled observatory reveal seasonal overwintering of Neocalanus spp. in Barkley Canyon, NE Pacific: Check for odetes Insights into particulate organic carbon flux	PROGRESS IN OCEANOGRAPHY	169		120	137	10.1016/j.pocean.2018.06.001	Many submarine canyons are known hotspots of pelagic and benthic biodiversity and productivity. Despite a very limited knowledge of the ecology, biodiversity and ecosystem function of Canada's West Coast canyons, Barkley Canyon is becoming a relatively well studied system, particularly after the installation of the NEPTUNE seafloor cabled observatory in 2009. Video observations of large densities…
37	exclude_title	exclude_title	exclude_title	OG	KH	DM	exclude_title				WoS_Scopus											Diehl, S; Thomsson, G; Kahlert, M; Guo, JW; Karlsson, J; Liess, A	2018	Inverse relationship of epilithic algae and pelagic phosphorus in unproductive lakes: Roles of N-2 fixers and light	FRESHWATER BIOLOGY	63	7	662	675	10.1111/fwb.13103	Phosphorus (P) often limits the biomass of primary producers in freshwater lakes. However, in unproductive northern lakes, where anthropogenic nitrogen (N) deposition is low, N instead of P can limit primary producers. In addition, light can be limiting to primary producers at high concentrations of coloured dissolved organic matter (cDOM), as cDOM is the major determinant of light penetration in…
38	exclude_abstract	exclude_abstract	include	OG	KH	DM	exclude_site_text				WoS_Scopus	yes	no	exclude_site_text				JM	no			Dokter, AM; Fokkema, W; Ebbinge, BS; Olff, H; van der Jeugd, HP; Nolet, BA	2018	Agricultural pastures challenge the attractiveness of natural saltmarsh for a migratory goose	JOURNAL OF APPLIED ECOLOGY	55	6	2707	2718	10.1111/1365-2664.13168	1. Broad-scale land conversions and fertilizer use have dramatically altered the available staging area for herbivorous long-distance migrants. Instead of natural land, these birds rely increasingly on pastures for migratory fuelling and stopover, often conflicting with farming practices. To predict and manage birds' future habitat use, the relative advantages and disadvantages of natural (e.g. s…
39	exclude_title	exclude_title	exclude_abstract	OG	KH	DM	exclude_abstract				WoS_Scopus											Dolant, C; Langlois, A; Brucker, L; Royer, A; Roy, A; Montpetit, B	2018	Meteorological inventory of rain-on-snow events in the Canadian Arctic Archipelago and satellite detection assessment using passive microwave data	PHYSICAL GEOGRAPHY	39	5	428	444	10.1080/02723646.2017.1400339	The spatial and temporal distributions of rain-on-snow (ROS) events across the Canadian Arctic Archipelago (CAA) remain poorly understood owing to their sporadic nature in time and space. This situation motivated the development of remote sensing detection algorithms. This paper uses a large meteorological dataset across the CAA to adapt an existing ROS-detection algorithm developed in a previous…
40	exclude_title	exclude_abstract	exclude_abstract	OG	KH	DM	exclude_abstract				WoS_Scopus											Dolant, C; Montpetit, B; Langlois, A; Brucker, L; Zolina, O; Johnson, CA; Royer, A; Smith, P	2018	Assessment of the Barren Ground Caribou Die-off During Winter 2015-2016 Using Passive Microwave Observations	GEOPHYSICAL RESEARCH LETTERS	45	10	4908	4916	10.1029/2017GL076752	In summer 2016, more than 50 Arctic Barren Ground caribous were found dead on Prince Charles Island (Nunavut, Canada), a species recently classified as threatened. Neither predator nor sign of diseases was observed and reported. The main hypothesis is that caribous were not able to access food due to a very dense snow surface, created by a strong storm system in spring. Using satellite microwave …
41	exclude_title	exclude_abstract	exclude_abstract	OG	KH	DM	exclude_abstract				WoS_Scopus											Domine, F; Gauthier, G; Vionnet, V; Fauteux, D; Dumont, M; Barrere, M	2018	Snow physical properties may be a significant determinant of lemming population dynamics in the high Arctic	ARCTIC SCIENCE	4	4	813	826	10.1139/as-2018-0008	Cyclic population fluctuations are common in boreal and Arctic species but the causes of these cycles are still debated today. Among these species, lemmings are Arctic rodents that live and reproduce under the snow and whose large cyclical population fluctuations in the high Arctic impact the whole tundra food web. We explore, using lemming population data and snow modeling, whether the hardness …
42	exclude_title	exclude_abstract	exclude_title	OG	KH	DM	exclude_abstract				WoS_Scopus											Dorji, T; Hopping, KA; Wang, SP; Piao, SL; Tarchene, T; Klein, JA	2018	Grazing and spring snow counteract the effects of warming on an alpine plant community in Tibet through effects on the dominant species	AGRICULTURAL AND FOREST METEOROLOGY	263		188	197	10.1016/j.agrformet.2018.08.017	Although studies have investigated the independent effects of warming, snow, and grazing on alpine plant community properties - including plant species richness, evenness, and diversity - the interactive effects of these climate and grazing factors have not been addressed experimentally in cold systems. We investigate the effects of these climate change and grazing factors using 5 years of data c…
43	include	exclude_title	exclude_abstract	OG	KH	DM	exclude_full_text				WoS_Scopus	yes	no		exclude_full_text	paper presents biodiversity databases from many places, but do not include relevant exposure (herbivory), relevant comparator (level of herbivory) or relevant outcome (herbivore effect on plants)	no_exposure	ICB	no			Dornelas, M; Antao, LH; Moyes, F; Bates, AE; Magurran, AE; Adam, D; Akhmetzhanova, AA; Appeltans, W; Arcos, JM; Arnold, H; Ayyappan, N; Badihi, G; Baird, AH; Barbosa, M; Barreto, TE; Baessler, C; Bellgrove, A; Belmaker, J; Benedetti-Cecchi, L; Bett, BJ; Bjorkman, AD; Blazewicz, M; Blowes, SA; Bloch, CP; Bonebrake, TC; Boyd, S; Bradford, M; Brooks, AJ; Brown, JH; Bruelheide, H; Budy, P; Carvalho, …	2018	BioTIME: A database of biodiversity time series for the Anthropocene	GLOBAL ECOLOGY AND BIOGEOGRAPHY	27	7	760	786	10.1111/geb.12729	Motivation: The BioTIME database contains raw data on species identities and abundances in ecological assemblages through time. These data enable users to calculate temporal trends in biodiversity within and amongst assemblages using a broad range of metrics. BioTIME is being developed as a community-led open-source database of biodiversity time series. Our goal is to accelerate and facilitate qu…
44	include	include	include	OG	KH	DM	exclude_site_coordinates				WoS_Scopus	yes	yes	exclude_site_coordinates	include			BH	yes			Egelkraut, D; Aronsson, KA; Allard, A; Akerholm, M; Stark, S; Olofsson, J	2018	Multiple Feedbacks Contribute to a Centennial Legacy of Reindeer on Tundra Vegetation	ECOSYSTEMS	21	8	1545	1563	10.1007/s10021-018-0239-z	Historical contingency is the impact of past events, like the timing and order of species arrival, on community assembly, and can sometimes result in alternative stable states of ecological communities. Large herbivores, wild and domestic, can cause profound changes in the structure and functioning of plant communities and therefore probably influence historical contingency; however, little empir…
45	include	exclude_abstract	include	OG	KH	DM	exclude_site_coordinates			150	WoS_Scopus	yes	yes	exclude_site_coordinates	include			BH	yes			Egelkraut, D; Kardol, P; De Long, JR; Olofsson, J	2018	The role of plant-soil feedbacks in stabilizing a reindeer-induced vegetation shift in subarctic tundra	FUNCTIONAL ECOLOGY	32	8	1959	1971	10.1111/1365-2435.13113	1. Herbivory can drive vegetation into different states of productivity and community composition, and these changes may be stable over time due to historical contingency effects. Interactions with abiotic and biotic soil components can contribute to such long-term legacies in plant communities through stabilizing positive feedbacks. 2. We studied the role of plant-soil feedbacks in maintaining v…
46	exclude_title	exclude_title	exclude_title	OG	KH	DM	exclude_title			151	WoS_Scopus											Fernandez-Mendez, M; Olsen, LM; Kauko, HM; Meyer, A; Rosel, A; Merkouriadi, I; Mundy, CJ; Ehn, JK; Johansson, AM; Wagner, PM; Ervik, A; Sorrell, BK; Duarte, P; Wold, A; Hop, H; Assmy, P	2018	Algal Hot Spots in a Changing Arctic Ocean: Sea-Ice Ridges and the Snow-Ice Interface	FRONTIERS IN MARINE SCIENCE	5				10.3389/fmars.2018.00075	During the N-ICE2015 drift expedition north-west of Svalbard, we observed the establishment and development of algal communities in first-year ice (FYI) ridges and at the snow-ice interface. Despite some indications of being hot spots for biological activity, ridges are under-studied largely because they are complex structures that are difficult to sample. Snow infiltration communities can grow a…
47	exclude_title	exclude_title	exclude_title	OG	KH	DM	exclude_title				WoS_Scopus											Flaig, PP; Hasiotis, ST; Fiorillo, AR	2018	A Paleopolar Dinosaur Track Site in the Cretaceous (Maastrichtian) Prince Creek Formation of Arctic Alaska: Track Characteristics and Probable Trackmakers	ICHNOS-AN INTERNATIONAL JOURNAL FOR PLANT AND ANIMAL TRACES	25	2019-03-02	208	220	10.1080/10420940.2017.1337011	For the first time a dinosaur track site is identified in Maastrichtian paleopolar coastal plain deposits of the Prince Creek Formation (PCF) along the Colville River, North Slope of Alaska. Tracks were made and preserved by trampling of an ash-covered swamp margin, subsequent filling of tracks with alluvium from nearby rivers, and modification of sediments by pedogensis. Tracks are grouped into …
48	exclude_title	exclude_title	exclude_title	OG	KH	DM	exclude_title				WoS_Scopus											Franze, G; Pierson, JJ; Stoecker, DK; Lavrentyev, PJ	2018	Diatom-produced allelochemicals trigger trophic cascades in the planktonic food web	LIMNOLOGY AND OCEANOGRAPHY	63	3	1093	1108	10.1002/lno.10756	Diatoms produce a series of cytotoxic secondary metabolites such as polyunsaturated aldehydes (PUA) in response to cell injury or stress. However, little information exists on the PUA effects on the pelagic food web. A set of experiments was conducted in the Chesapeake Bay and the coastal Atlantic waters using dissolved PUA (2E,4E-octadienal and 2E,4E-heptadienal), natural assemblages of phytopla…
49	exclude_title	exclude_title	exclude_title	OG	KH	DM	exclude_title				WoS_Scopus											Fujiwara, A; Nishino, S; Matsuno, K; Onodera, J; Kawaguchi, Y; Hirawake, T; Suzuki, K; Inoue, J; Kikuchi, T	2018	Changes in phytoplankton community structure during wind-induced fall bloom on the central Chukchi shelf	POLAR BIOLOGY	41	6	1279	1295	10.1007/s00300-018-2284-7	The recent increasing of atmospheric turbulence has had considerable impact on the oceanic environment and ecosystems of the Arctic. To understand its effect on phytoplankton community structure, a Eulerian fixed-point observation (FPO) was conducted on the Chukchi shelf in fall 2013. Temporal and vertical distributions of the phytoplankton community were inferred from algal pigment signatures. A…
50	include	exclude_abstract	include	OG	KH	DM	include	not herbivory effects on plants			WoS_Scopus	yes	yes	include	include			OG	yes			Gamarra, JGP; Callaghan, TV; Bylund, H; Gwynn-Jones, D	2018	Larval crowding during an insect outbreak reduces herbivory pressure on preferred shrubs in a warmer environment	AGRICULTURAL AND FOREST METEOROLOGY	263		180	187	10.1016/j.agrformet.2018.08.016	With warming climate many species are predicted to shift their distributions toward the poles. However, climate change models developed to predict species distributions do not always incorporate interactions between them. The northerly shift of the boreal forest and associated dwarf shrub communities will be directly affected by warming. But warming will also indirectly affect plant communities v…
51	exclude_abstract	exclude_abstract	exclude_abstract	OG	KH	DM	exclude_abstract				WoS_Scopus											Gamm, CM; Sullivan, PF; Buchwal, A; Dial, RJ; Young, AB; Watts, DA; Cahoon, SMP; Welker, JM; Post, E	2018	Declining growth of deciduous shrubs in the warming climate of continental western Greenland	JOURNAL OF ECOLOGY	106	2	640	654	10.1111/1365-2745.12882	Observational and experimental studies have generally shown that warming is associated with greater growth and abundance of deciduous shrubs in arctic ecosystems. It is uncertain, however, if this trend will persist in the future. Our study examined growth responses of deciduous shrubs to climate change over the late 20th and early 21st centuries near Kangerlussuaq in western Greenland. We combin…
52	exclude_abstract	duplicate	exclude_abstract	OG	KH	DM	remove_duplicate	duplicate		153	WoS_Scopus											Gharajehdaghipour, T; Roth, JD	2018	Predators attract prey through ecosystem engineering in the Arctic	ECOSPHERE	9	1			10.1002/ecs2.2077	Predators can affect prey through mechanisms other than predation; for example, redistributing resources could modify habitats favorably for other organisms. We examined Arctic fox (Vulpes lagopus) den use by lemmings, their primary prey, in winter during a year of low lemming densities. We found winter nests, which are built by lemmings under snow, on 69% of fox dens, whereas no control sites ha…
53	exclude_abstract	exclude_abstract	exclude_abstract	OG	KH	DM	exclude_abstract				WoS_Scopus											Gibson, DJ; Adamowicz, SJ; Jacobs, SR; Smith, MA	2018	Host Specificity in Subarctic Aphids	ENVIRONMENTAL ENTOMOLOGY	47	1	77	86	10.1093/ee/nvx176	Plants and herbivorous (or parasitic) insects form the majority of macroscopic life. The specificity of interaction between host plant and parasitic insect depends on the adaptations of both the host and the parasite. Over time, these interactions evolve and change as a result of an 'arms race' between host and parasite, and the resulting species-specific adaptations may be maintained, perpetuati…
54	include	include	include	OG	KH	DM	include				WoS_Scopus	yes	yes	include	include			BH	yes			Gough, L; Johnson, DR	2018	Mammalian herbivory exacerbates plant community responses to long-term increased soil nutrients in two Alaskan tundra plant communities	ARCTIC SCIENCE	4	2	153	166	10.1139/as-2017-0025	The interaction between bottom-up and top-down forces in regulating plant communities is a long-standing topic of interest in ecology. Factorial field experiments examining these factors have been relatively few, but recent meta-analyses provide predictions that can be tested in a range of ecosystems. We tested the prediction that added nutrients would reduce species richness and evenness, while …
55	exclude_abstract	exclude_abstract	exclude_abstract	OG	KH	DM	exclude_abstract				WoS_Scopus											Green, AJ; Lovas-Kiss, A; Stroud, RA; Tierney, N; Fox, AD	2018	Plant dispersal by Canada geese in Arctic Greenland	POLAR RESEARCH	37	1			10.1080/17518369.2018.1508268	Despite the abundance of migratory geese as herbivores in the Arctic, and ongoing changes in their populations and distributions, little is known about their role in seed dispersal. Climate change requires Arctic plants to adjust their distributions, and avian vectors may have an important role to play. We present the first study of endozoochory (internal transport) of Arctic plants by Canada gee…
56	include	include	include	OG	KH	DM	include				WoS_Scopus	yes	yes	include	include			BH	yes			Grogan, P; Zamin, TJ	2018	Growth responses of the common arctic graminoid Eriophorum vaginatum to simulated grazing are independent of soil nitrogen availability	OECOLOGIA	186	1	151	162	10.1007/s00442-017-3990-5	Plant compensatory growth responses to herbivory are mediated by soil fertility and can have significant feedbacks that affect overall ecosystem nutrient cycling. The sedge Eriophorum vaginatum is the dominant graminoid in arctic mesic tundra, and is heavily consumed by caribou. Here, we compare the principal compensatory growth models in explaining the impact of a single episode of simulated car…
57	exclude_title	exclude_title	exclude_abstract	OG	KH	DM	exclude_abstract				WoS_Scopus											Hansen, CCR; Hvilsom, C; Schmidt, NM; Aastrup, P; de Groot, PJV; Siegismund, HR; Heller, R	2018	The Muskox Lost a Substantial Part of Its Genetic Diversity on Its Long Road to Greenland	CURRENT BIOLOGY	28	24	4022	+	10.1016/j.cub.2018.10.054	The muskox (Ovibos moschatus) is the largest terrestrial herbivore in the Arctic and plays a vital role in the tundra ecosystem [1-4]. Its range, abundance, and genetic diversity have declined dramatically over the past 30,000 years [5]. Two subspecies are recognized, but little is known about the genetic structure and how this relates to the species history. One unresolved question is how and wh…
58	exclude_title	exclude_title	exclude_title	OG	KH	DM	exclude_title				WoS_Scopus											Hardardottir, S; Krock, B; Wohlrab, S; John, U; Nielsen, TG; Lundholm, N	2018	Can domoic acid affect escape response in copepods?	HARMFUL ALGAE	79		50	52	10.1016/j.hal.2018.08.009	Copepods are important grazers on toxic phytoplankton and serve as vectors for algal toxins up the marine food web. Success of phytoplankton depends among other factors on protection against grazers like copepods, and same way copepod survival and population resilience relies on their ability to escape predators. Little is, however, known about the effect of toxins on the escape response of copep…
59	exclude_title	exclude_title	exclude_title	OG	KH	DM	exclude_title				WoS_Scopus											Hill, VJ; Light, B; Steele, M; Zimmerman, RC	2018	Light Availability and Phytoplankton Growth Beneath Arctic Sea Ice: Integrating Observations and Modeling	JOURNAL OF GEOPHYSICAL RESEARCH-OCEANS	123	5	3651	3667	10.1029/2017JC013617	Observations of the seasonal light field in the upper Arctic Ocean are critical to understanding the impacts of changing Arctic ice conditions on phytoplankton growth in the water column. Here we discuss data from a new sensor system, deployed in seasonal ice cover north-east of Utqiagvik, Alaska in March 2014. The system was designed to provide observations of light and phytoplankton biomass in …
60	exclude_title	exclude_title	exclude_abstract	OG	KH	DM	exclude_abstract				WoS_Scopus											Hupp, JW; Ward, DH; Soto, DX; Hobson, KA	2018	Spring temperature, migration chronology, and nutrient allocation to eggs in three species of arctic-nesting geese: Implications for resilience to climate warming	GLOBAL CHANGE BIOLOGY	24	11	5056	5071	10.1111/gcb.14418	The macronutrients that Arctic herbivores invest in their offspring are derived from endogenous reserves of fat and protein (capital) that females build prior to the period of investment or from foods they consume concurrently with investment (income). The relative contribution from each source can be influenced by temporal and environmental constraints on a female's ability to forage on Arctic b…
61	exclude_title	exclude_title	exclude_abstract	OG	KH	DM	exclude_abstract				WoS_Scopus											Iles, DT; Rockwell, RF; Koons, DN	2018	Reproductive success of a keystone herbivore is more variable and responsive to climate in habitats with lower resource diversity	JOURNAL OF ANIMAL ECOLOGY	87	4	1182	1191	10.1111/1365-2656.12837	1. The effects of climate on wild populations are often channelled through species interactions. Population responses to climate variation can therefore differ across habitats, owing to variation in the biotic community. Theory predicts that consumer demography should be less variable and less responsive to climate in habitats with greater resource diversity. 2. We tested these predictions using …
62	exclude_title	exclude_abstract	exclude_abstract	OG	KH	DM	exclude_abstract				WoS_Scopus											Johnson, HE; Gustine, DD; Golden, TS; Adams, LG; Parrett, LS; Lenart, EA; Barboza, PS	2018	NDVI exhibits mixed success in predicting spatiotemporal variation in caribou summer forage quality and quantity	ECOSPHERE	9	10			10.1002/ecs2.2461	The satellite-derived Normalized Difference Vegetation Index (NDVI) is commonly used by researchers and managers to represent ungulate forage conditions in landscapes across the globe, despite limited information about how it compares to empirical measurements of forage quality and quantity. The application of NDVI as a forage metric is particularly appealing for studying migratory caribou (Rangi…
63	include	exclude_title	include	OG	KH	DM	exclude_full_text				WoS_Scopus	yes	yes	include	exclude_full_text	no quantitatively analyzabe primary data on plants reported, biomass only mentioned categorically to refine models	no_outcome	BH	no			Kelsey, KC; Leffler, AJ; Beard, KH; Tchoi, R; Schmutz, JA; Welker, JM	2018	Phenological mismatch in coastal western Alaska may increase summer season greenhouse gas uptake	ENVIRONMENTAL RESEARCH LETTERS	13	4			10.1088/1748-9326/aab698	High latitude ecosystems are prone to phenological mismatches due to climate change-driven advances in the growing season and changing arrival times of migratory herbivores. These changes have the potential to alter biogeochemical cycling and contribute to feedbacks on climate change by altering greenhouse gas (GHG) emissions of carbon dioxide (CO2), methane (CH4) and nitrous oxide (N2O) through …
64	exclude_abstract	exclude_abstract	exclude_abstract	OG	KH	DM	exclude_abstract				WoS_Scopus											Kharouba, HM; Ehrlen, J; Gelman, A; Bolmgren, K; Allen, JM; Travers, SE; Wolkovich, EM	2018	Global shifts in the phenological synchrony of species interactions over recent decades	PROCEEDINGS OF THE NATIONAL ACADEMY OF SCIENCES OF THE UNITED STATES OF AMERICA	115	20	5211	5216	10.1073/pnas.1714511115	Phenological responses to climate change (e.g., earlier leaf-out or egg hatch date) are now well documented and clearly linked to rising temperatures in recent decades. Such shifts in the phenologies of interacting species may lead to shifts in their synchrony, with cascading community and ecosystem consequences. To date, single-system studies have provided no clear picture, either finding synchr…
65	exclude_title	exclude_abstract	include	OG	KH	DM	exclude_full_text				WoS_Scopus	yes	yes	include	exclude_full_text	study on microbes on plant buds	no_outcome	BH	no			Koivusaari, P; Pohjanen, J; Wali, PR; Ahonen, SHK; Saravesi, K; Markkola, AM; Haapala, K; Suokas, M; Koskimaki, JJ; Tejesvi, MV; Pirttila, AM	2018	Different endophyte communities colonize buds of sprouts compared with mature trees of mountain birch recovered from moth herbivory	TREE PHYSIOLOGY	38	9	1437	1444	10.1093/treephys/tpy012	Plant meristems were previously thought to be sterile. Today, meristem-associated shoot endophytes are mainly reported as contaminants from plant tissue cultures, the number of observed species being very low. However, the few strains characterized have the capacity for infecting host cells and affecting plant growth and development. Here we studied the communities of endophytic bacteria in the b…
66	exclude_abstract	exclude_abstract	exclude_abstract	OG	KH	DM	exclude_abstract			155	WoS_Scopus											Koltz, AM; Schmidt, NM; Hoye, TT	2018	Differential arthropod responses to warming are altering the structure of Arctic communities	ROYAL SOCIETY OPEN SCIENCE	5	4			10.1098/rsos.171503	The Arctic is experiencing some of the fastest rates of warming on the planet. Although many studies have documented responses to such warming by individual species, the idiosyncratic nature of these findings has prevented us from extrapolating them to community-level predictions. Here, we leverage the availability of a long-term dataset from Zackenberg, Greenland (593 700 specimens collected bet…
67	exclude_title	exclude_title	include	OG	KH	DM	exclude_full_text	ICB exclude: boreal forest			WoS_Scopus	yes	yes	include	exclude_full_text	not relevant population -- explicitly states "northern boreal forest	no_population	BH	yes	RB	exclude_full_text	Koster, K; Koster, E; Berninger, F; Heinonsalo, J; Pumpanen, J	2018	Contrasting effects of reindeer grazing on CO2, CH4, and N2O fluxes originating from the northern boreal forest floor	LAND DEGRADATION & DEVELOPMENT	29	2	374	381	10.1002/ldr.2868	Reindeer (Rangifer tarandus L.) is considered to be an important mammalian herbivore, strongly influencing Arctic lichen-dominated ecosystems. There is no wide knowledge about the effect of reindeer on greenhouse gas (GHG) fluxes in northern boreal forests. Ground vegetation plays an important role in absorbing nitrogen (N) and carbon dioxide (CO2) from the atmosphere. Lately, it has also been fo…
68	exclude_title	exclude_title	exclude_title	OG	KH	DM	exclude_title				WoS_Scopus											Krause, JW; Duarte, CM; Marquez, IA; Assmy, P; Fernandez-Mendez, M; Wiedmann, I; Wassmann, P; Kristiansen, S; Agusti, S	2018	Biogenic silica production and diatom dynamics in the Svalbard region during spring	BIOGEOSCIENCES	15	21	6503	6517	10.5194/bg-15-6503-2018	Diatoms are generally the dominant contributors to the Arctic Ocean spring bloom, which is a key event in regional food webs in terms of capacity for secondary production and organic matter export. Dissolved silicic acid is an obligate nutrient for diatoms and has been declining in the European Arctic since the early 1990s. The lack of regional silicon cycling information precludes understanding …
69	exclude_abstract	exclude_abstract	co-author	OG	KH	DM	exclude_abstract			70	WoS_Scopus											Kristensen, JA; Metcalfe, DB; Rousk, J	2018	The biogeochemical consequences of litter transformation by insect herbivory in the Subarctic: a microcosm simulation experiment	BIOGEOCHEMISTRY	138	3	323	336	10.1007/s10533-018-0448-8	Warming may increase the extent and intensity of insect defoliations within Arctic ecosystems. A thorough understanding of the implications of this for litter decomposition is essential to make predictions of soil-atmosphere carbon (C) feedbacks. Soil nitrogen (N) and C cycles naturally are interlinked, but we lack a detailed understanding of how insect herbivores impact these cycles. In a labora…
70	(doi=correction from previous)	duplicate	co-author	OG	KH	DM	remove_duplicate	duplicate		69	WoS_Scopus											Kristensen, JA; Metcalfe, DB; Rousk, J	2018	The biogeochemical consequences of litter transformation by insect herbivory in the Subarctic: a microcosm simulation experiment (vol 138, pg 323, 2018)	BIOGEOCHEMISTRY	138	3	337	337	10.1007/s10533-018-0451-0
71	exclude_title	exclude_title	exclude_title	OG	KH	DM	exclude_title				WoS_Scopus											Kumagai, NH; Molinos, JG; Yamano, H; Takao, S; Fujii, M; Yamanaka, Y	2018	Ocean currents and herbivory drive macroalgae-to-coral community shift under climate warming	PROCEEDINGS OF THE NATIONAL ACADEMY OF SCIENCES OF THE UNITED STATES OF AMERICA	115	36	8990	8995	10.1073/pnas.1716826115	Coral and macroalgal communities are threatened by global stressors. However, recently reported community shifts from temperate macroalgae to tropical corals offer conservation potential for corals at the expense of macroalgae under climate warming. Although such community shifts are expanding geographically, our understanding of the driving processes is still limited. Here, we reconstruct long-t…
72	exclude_title	exclude_abstract	exclude_abstract	OG	KH	DM	exclude_abstract				WoS_Scopus											Lameris, TK; van der Jeugd, HP; Eichhorn, G; Dokter, AM; Bouten, W; Boom, MP; Litvin, KE; Ens, BJ; Nolet, BA	2018	Arctic Geese Tune Migration to a Warming Climate but Still Suffer from a Phenological Mismatch	CURRENT BIOLOGY	28	15	2467	+	10.1016/j.cub.2018.05.077	Climate warming challenges animals to advance their timing of reproduction [1], butmany animals appear to be unable to advance at the same rate as their food species [2, 3]. As a result, mismatches can arise between the moment of largest food requirements for their offspring and peak food availability [4-6], with important fitness consequences [7]. For long-distance migrants, adjustment of phenol…
73	exclude_title	exclude_title	exclude_abstract	OG	KH	DM	exclude_abstract				WoS_Scopus											Le Vaillant, M; Erlandsson, R; Elmhagen, B; Hornfeldt, B; Eide, NE; Angerbjorn, A	2018	Spatial distribution in Norwegian lemming Lemmus lemmus in relation to the phase of the cycle	POLAR BIOLOGY	41	7	1391	1403	10.1007/s00300-018-2293-6	Competition between individuals of the same or different species affects spatial distribution of organisms at any given time. Consequently, a species geographical distribution is related to population dynamics through density-dependent processes. Small Arctic rodents are important prey species in many Arctic ecosystems. They commonly show large cyclic fluctuations in abundance offering a potentia…
74	exclude_abstract	exclude_abstract	exclude_abstract	OG	KH	DM	exclude_abstract				WoS_Scopus											Lee, MA	2018	A global comparison of the nutritive values of forage plants grown in contrasting environments	JOURNAL OF PLANT RESEARCH	131	4	641	654	10.1007/s10265-018-1024-y	Forage plants are valuable because they maintain wild and domesticated herbivores, and sustain the delivery of meat, milk and other commodities. Forage plants contain different quantities of fibre, lignin, minerals and protein, and vary in the proportion of their tissue that can be digested by herbivores. These nutritive components are important determinants of consumer growth rates, reproductive…
75	exclude_abstract	exclude_abstract	exclude_abstract	OG	KH	DM	exclude_abstract			157	WoS_Scopus											Lezama-Nunez, PR; Santos-Fita, D; Vallejo, JR	2018	Herding Ecologies and Ongoing Plant Domestication Processes in the Americas	FRONTIERS IN PLANT SCIENCE	9				10.3389/fpls.2018.00649	Understanding both domestication processes and agricultural practices is an interdisciplinary endeavor. Ethnographic research is potentially helpful for reconstructing past events. Such knowledge is also crucial for documenting the links between biological and cultural diversity, as well as for future purposes such as innovation in food production and sustainability. Here, we review six ethnograp…
76	exclude_title	exclude_abstract	exclude_title	OG	KH	DM	exclude_abstract				WoS_Scopus											Lord, JM; Mark, AF; Humar-Maegli, T; Halloy, SRP; Bannister, P; Knight, A; Dickinson, KJM	2018	Slow community responses but rapid species responses 14 years after alpine turf transplantation among snow cover zones, south-central New Zealand	PERSPECTIVES IN PLANT ECOLOGY EVOLUTION AND SYSTEMATICS	30		51	61	10.1016/j.ppees.2017.07.004	Alpine ecosystems are particularly vulnerable to the impact of global climate change. Depth and duration of seasonal snow cover are major drivers of variation in alpine plant community composition, so a reduction in snow cover as a result of climate change would expose plants that are currently protected by snow in winter and spring to greater extremes of temperature and increased risk of frost d…
77	exclude_title	exclude_abstract	exclude_abstract	OG	KH	DM	exclude_abstract				WoS_Scopus											Lynn, JS; Canfield, S; Conover, RR; Keene, J; Rudgers, JA	2018	Pocket gopher (Thomomys talpoides) soil disturbance peaks at mid-elevation and is associated with air temperature, forb cover, and plant diversity	ARCTIC ANTARCTIC AND ALPINE RESEARCH	50	1			10.1080/15230430.2018.1487659	Burrowing mammals can be ecosystem engineers by increasing soil aeration and erosion and altering the structure of plant communities. Studies that characterize the constraints on the distributions of fossorial mammal disturbances to soil can help predict changes in ecosystem engineering under future climates. We quantified the density of soil disturbances caused by Thomomys talpoides (northern po…
78	include	include	include	OG	KH	DM	include			3445	WoS_Scopus	yes	yes	include	include			OG	yes			Maliniemi, T; Kapfer, J; Saccone, P; Skog, A; Virtanen, R	2018	Long-term vegetation changes of treeless heath communities in northern Fennoscandia: Links to climate change trends and reindeer grazing	JOURNAL OF VEGETATION SCIENCE	29	3	469	479	10.1111/jvs.12630	QuestionIn recent decades, high-latitude climate has shown regionally variable trends towards warmer and moister conditions. These changes have been predicted to cause afforestation or shrubification of open tundra, increases of warmth-demanding southern species and plant groups favoured by increased moisture, and decline of species and habitats that are dependent on snow cover. In this study, we…
79	exclude_title	exclude_title	exclude_title	OG	KH	DM	exclude_title				WoS_Scopus											Mariash, HL; Smith, PA; Mallory, M	2018	Decadal Response of Arctic Freshwaters to Burgeoning Goose Populations	ECOSYSTEMS	21	6	1230	1243	10.1007/s10021-017-0215-z	The Arctic is faced with rapid climatic changes, but in some areas, drastic changes in the abundance of herbivores represent an even greater agent of change. Increasing goose populations, especially midcontinent lesser snow geese (Chen caerulescens), have led to an extensive loss of vegetation in terrestrial habitats in the Arctic through heavy grazing and destructive foraging. Our aim was to eva…
80	exclude_title	exclude_title	exclude_abstract	OG	KH	DM	exclude_abstract				WoS_Scopus											Mazei, YA; Lebedeva, NV; Taskaeva, AA; Ivanovsky, AA; Chernyshov, VA; Tsyganov, AN; Payne, RJ	2018	What role does human activity play in microbial biogeography?: The revealing case of testate amoebae in the soils of Pyramiden, Svalbard	PEDOBIOLOGIA	67		10	15	10.1016/j.pedobi.2018.02.002	The role of human activity as a vector in the movement of soil microorganisms is uncertain and disputed. It is increasingly clear that some larger microorganisms have restricted distributions and plausible to imagine that many human activities could lead to exotic species introductions, but concrete examples are lacking. We investigated an unusual case study: the former mining settlement of Pyram…
81	exclude_title	exclude_title	exclude_title	OG	KH	DM	exclude_title				WoS_Scopus											McKinstry, CAE; Campbell, RW	2018	Seasonal variation of zooplankton abundance and community structure in Prince William Sound, Alaska, 2009-2016	DEEP-SEA RESEARCH PART II-TOPICAL STUDIES IN OCEANOGRAPHY	147		69	78	10.1016/j.dsr2.2017.08.016	Large calanoid copepods and other zooplankters comprise the prey field for ecologically and economically important predators such as juvenile pink salmon, herring, and seabirds in Prince William Sound (PWS). From 2009-2016, the Gulf Watch Alaska program collected zooplankton 5-10 times each year at 12 stations in PWS to establish annual patterns. Surveys collected 188 species of zooplankton with …
82	exclude_title	exclude_title	exclude_title	OG	KH	DM	exclude_title				WoS_Scopus											Menden-Deuer, S; Lawrence, C; Franze, G	2018	Herbivorous protist growth and grazing rates at in situ and artificially elevated temperatures during an Arctic phytoplankton spring bloom	PEERJ	6				10.7717/peerj.5264	To assess protistan grazing impact and temperature sensitivity on plankton population dynamics, we measured bulk and species-specific phytoplankton growth and herbivorous protist grazing rates in Disko Bay, West Greenland in April-May 2011. Rate estimates were made at three different temperatures in situ (0 degrees C), +3 degrees C and +6 degrees C over ambient. In situ Chlorophyll a (Chl a) doub…
83	exclude_title	exclude_title	exclude_title	OG	KH	DM	exclude_title				WoS_Scopus											Middelbo, AB; Sejr, MK; Arendt, KE; Moller, EF	2018	Impact of glacial meltwater on spatiotemporal distribution of copepods and their grazing impact in Young Sound NE, Greenland	LIMNOLOGY AND OCEANOGRAPHY	63	1	322	336	10.1002/lno.10633	The melting of sea ice, increased terrestrial runoff and meltwater from the Greenland Ice Sheet contribute to increased freshening and stratification of Arctic seas. However, the impacts on ecosystem structure and carbon cycling are still poorly quantified. We studied copepod abundance, grazing, and carbon turnover in Young Sound, Northeast Greenland, during the ice-free period from mid-July to e…
84	exclude_title	exclude_title	exclude_title	OG	KH	DM	exclude_title			159	WoS_Scopus											Mills, MM; Brown, ZW; Laney, SR; Ortega-Retuerta, E; Lowry, KE; van Dijken, GL; Arrigo, KR	2018	Nitrogen Limitation of the Summer Phytoplankton and Heterotrophic Prokaryote Communities in the Chukchi Sea	FRONTIERS IN MARINE SCIENCE	5				10.3389/fmars.2018.00362	Major changes to Arctic marine ecosystems have resulted in longer growing seasons with increased phytoplankton production over larger areas. In the Chukchi Sea, the high productivity fuels intense benthic denitrification creating a nitrogen (N) deficit that is transported through the Arctic to the Atlantic Ocean, where it likely fuels N fixation. Given the rapid pace of environmental change and t…
85	exclude_abstract	exclude_abstract	exclude_abstract	OG	KH	DM	exclude_abstract				WoS_Scopus											Mizin, IA; Sipko, TP; Davydov, AV; Gruzdev, AR	2018	THE WILD REINDEER (RANGIFER TARANDUS: CERVIDAE, MAMMALIA) ON THE ARCTIC ISLANDS OF RUSSIA: A REVIEW	NATURE CONSERVATION RESEARCH	3	3	1	14	10.24189/ncr.2018.040	The article presents summary data on the wild reindeer's (Rangifer tarandus) distribution on islands in the Russian Arctic. It discusses the abundance, diet, and general state of knowledge about the species in remote areas, especially on Novaya Zemlya and Wrangel Island. Brief data are provided about domestic reindeer grazing on the Arctic islands. Literature data are complemented with research f…
86	exclude_abstract	exclude_abstract	exclude_abstract	OG	KH	DM	exclude_abstract				WoS_Scopus											Mlynarek, JJ; Heard, SB	2018	Strong and complex host- and habitat-associated genetic differentiation in an apparently polyphagous leaf mining insect	BIOLOGICAL JOURNAL OF THE LINNEAN SOCIETY	125	4	885	899	10.1093/biolinnean/bly166	Phytophagous insects are astonishingly diverse, and their diversification is frequently shown to involve host shifting and host specialization. Habitat-associated differentiation may also occur for insects exploiting a single host in multiple habitats, although this is much less frequently reported. We tested for host-and habitat-associated differentiation in the holarctic and purportedly general…
87	include	include	include	OG	KH	DM	include	no direct measure of herbivory or anlaysis of plant-herbivore interactions, only indirect discussion of herbivore population change in relation to recruitment measured in plants, but since related to herbivore - included		160	WoS_Scopus	yes	yes	include	include			KM	yes			Morrissette-Boileau, C; Boudreau, S; Tremblay, JP; Cote, SD	2018	Revisiting the role of migratory caribou in the control of shrub expansion in northern Nunavik (Quebec, Canada)	POLAR BIOLOGY	41	9	1845	1853	10.1007/s00300-018-2325-2	Widespread shrub expansion has been observed at the circumpolar scale in response to climate change. This phenomenon could be inhibited by large herbivores through selective browsing that reduces shrub growth. Our objective was to assess the dynamics of shrub species in the Deception Bay area, in Nunavik (Quebec, Canada), a region in the summer range of the Riviere-aux-Feuilles migratory caribou …
88	include	include	include	OG	KH	DM	include				WoS_Scopus	yes	yes	include	include			BH	yes			Morrissette-Boileau, C; Boudreau, S; Tremblay, JP; Cote, SD	2018	Simulated caribou browsing limits the effect of nutrient addition on the growth of Betula glandulosa, an expanding shrub species in Eastern Canada	JOURNAL OF ECOLOGY	106	3	1256	1265	10.1111/1365-2745.12899	Warmer summer temperatures and enhanced soil fertility increase shrub growth in tundra ecosystems, and these factors have likely contributed to shrub expansion at the circumpolar scale over the last decades. Conversely, large herbivores have the potential to counteract the positive impacts of climate change on shrub growth. Indeed, by stripping the leaves, herbivores have the potential to control…
89	exclude_title	exclude_title	exclude_title	OG	KH	DM	exclude_title			162	WoS_Scopus											Muller, O; Seuthe, L; Bratbak, G; Paulsen, ML	2018	Bacterial Response to Permafrost Derived Organic Matter Input in an Arctic Fiord	FRONTIERS IN MARINE SCIENCE	5				10.3389/fmars.2018.00263	The warming of the Arctic causes increased riverine discharge, coastal erosion, and the thawing of permafrost. Together, this is leading to an increased wash out of terrestrial dissolved organic matter (tDOM) into the coastal Arctic ecosystems. This tDOM may be anticipated to affect both carbon and nutrient flow in the microbial food web and microbial community composition, but there are few stud…
90	exclude_title	exclude_title	exclude_title	OG	KH	DM	exclude_title				WoS_Scopus											Namba, M; Nakaoka, M	2018	Spatial patterns and predictor variables vary among different types of primary producers and consumers in eelgrass (Zostera marina) beds	PLOS ONE	13	8			10.1371/journal.pone.0201791	Eelgrass (Zostera marina) forms extensive beds in coastal and estuarine environments and provides various ecosystem functions. The aboveground part of eelgrass provides habitats for other types of primary producers such as epiphytic microalgae and for epifaunal invertebrate grazers. Because of the different sizes, generation times and resource requirements, these different types of producers and …
91	exclude_abstract	exclude_abstract	exclude_abstract	OG	KH	DM	exclude_abstract				WoS_Scopus											Nehemy, MF; Laroque, CP	2018	Tree-ring analysis of larch sawfly (Pristiphora erichsonii (Hartig)) defoliation events and hydrological growth suppression in a peatland	DENDROCHRONOLOGIA	51		1	9	10.1016/j.dendro.2018.06.006	Insect defoliation events are a major forest disturbance in the boreal forest in Canada. Reconstructing previous events are crucial to understanding natural factors that lead to insect defoliation periods, improving our ability to predict future infestations and increasing the reliability of forest management plans and pest control programs. Researchers have often been limited in their ability to…
92	exclude_title	exclude_title	exclude_abstract	OG	KH	DM	exclude_abstract			164	WoS_Scopus											Nyffeler, M; Sekercioglu, CH; Whelan, CJ	2018	Insectivorous birds consume an estimated 400-500 million tons of prey annually	SCIENCE OF NATURE	105	2019-08-07			10.1007/s00114-018-1571-z	In this paper, we present an estimate of the predation impact of the global population of insectivorous birds based on 103 (for the most part) published studies of prey consumption (kg ha(-1) season(-1)) of insectivorous birds in seven biome types. By extrapolation-taking into account the global land cover of the various biomes-an estimate of the annual prey consumption of the world's insectivoro…
93	exclude_title	exclude_title	exclude_title	OG	KH	DM	exclude_title				WoS_Scopus											Ohenoja, E; Ruotsalainen, AL; Vauras, J	2018	Mycological records from ISAM 9, Kevo, Finland	MYCOSCIENCE	59	4	263	267	10.1016/j.myc.2017.12.003	ISAM 9 (International Symposium of Arctic-Alpine Mycology) was held in August 2012 at the Kevo Lapland Research Station in Utsjoki in northernmost Finnish Lapland. In addition to Utsjoki, some excursions were made in Finnmark, the northernmost part of Norway. Kevo station lies in the subarctic zone characterized by mountain birch (Betula pubescens var. czerepanovii), but the fells reach the arcti…
94	include	include	exclude_abstract	OG	KH	DM	exclude_full_text				WoS_Scopus	yes	no	NA	exclude_full_text	review article	no_outcome_data	JM	no			Olofsson, J; Post, E	2018	Effects of large herbivores on tundra vegetation in a changing climate, and implications for rewilding	PHILOSOPHICAL TRANSACTIONS OF THE ROYAL SOCIETY B-BIOLOGICAL SCIENCES	373	1761			10.1098/rstb.2017.0437	In contrast to that of the Pleistocene epoch, between approximately 2.6 million and 10 000 years before present, the extant community of large herbivores in Arctic tundra is species-poor predominantly due to human extinctions. We here discuss how this species-poor herbivore guild influences tundra ecosystems, especially in relation to the rapidly changing climate. We show that present herbivore a…
95	exclude_abstract	exclude_abstract	exclude_abstract	OG	KH	DM	exclude_abstract				WoS_Scopus											Pacyna, AD; Koziorowska, K; Chmiel, S; Mazerski, J; Polkowska, Z	2018	Svalbard reindeer as an indicator of ecosystem changes in the Arctic terrestrial ecosystem	CHEMOSPHERE	203		209	218	10.1016/j.chemosphere.2018.03.158	Over the years, noticeable effort has been directed towards contaminant determination in multiple biotic samples collected from the inhabitants of the Arctic. Little consideration has been given to polar herbivores, however, especially those from the European parts of the Arctic. To provide a broader perspective, we aimed to decipher trace element concentration in hairs of the key species in the …
96	exclude_title	exclude_title	exclude_title	OG	KH	DM	exclude_title			165	WoS_Scopus											Paulsen, ML; Seuthe, L; Reigstad, M; Larsen, A; Cape, MR; Vernet, M	2018	Asynchronous Accumulation of Organic Carbon and Nitrogen in the Atlantic Gateway to the Arctic Ocean	FRONTIERS IN MARINE SCIENCE	5				10.3389/fmars.2018.00416	Nitrogen (N) is the main limiting nutrient for biological production in the Arctic Ocean. While dissolved inorganic N (DIN) is well studied, the substantial pool of N bound in organic matter (OM) and its bioavailability in the system is rarely considered. Covering a full annual cycle, we here follow N and carbon (C) content in particulate (P) and dissolved (D) OM within the Atlantic water inflow …
97	exclude_abstract	exclude_title	exclude_abstract	OG	KH	DM	exclude_abstract				WoS_Scopus											Payette, S; Delwaide, A	2018	Tamm review: The North-American lichen woodland	FOREST ECOLOGY AND MANAGEMENT	417		167	183	10.1016/j.foreco.2018.02.043	The lichen woodland (LW) is an open-crown subarctic forest distributed principally in North America where it extends from Newfoundland in Atlantic Canada to the Yukon and Alaska. It is the main tree ecosystem of the LW zone north of the closed-crown boreal forest zone, and south of the forest-tundra zone where its cover diminishes progressively toward the Arctic tree line. Growth and development …
98	exclude_title	exclude_title	exclude_title	OG	KH	DM	exclude_title				WoS_Scopus											Pedersen, T; Fuhrmann, MM; Lindstrom, U; Nilssen, EM; Ivarjord, T; Ramasco, V; Jorgensen, LL; Sundet, JH; Sivertsen, K; Kallgren, E; Hjelset, AM; Michaelsen, C; Systad, G; Norrbin, F; Svenning, MA; Bjorge, A; Steen, H; Nilssen, KT	2018	Effects of the invasive red king crab on food web structure and ecosystem properties in an Atlantic fjord	MARINE ECOLOGY PROGRESS SERIES	596		13	31	10.3354/meps12548	Since the 1990s, the density of the invasive red king crab Paralithodes camtschaticus has increased dramatically in coastal areas in northern Norway. We investigated its direct and indirect effects on food web structure and ecosystem properties (e.g. species biomasses and production) in the Porsanger Fjord in the study period 2009-2011 using 5 subarea Ecopath food web models. The 5 baseline model…
99	exclude_abstract	exclude_abstract	exclude_abstract	OG	KH	DM	exclude_abstract				WoS_Scopus											Reichle, LM; Epstein, HE; Bhatt, US; Raynolds, MK; Walker, DA	2018	Spatial Heterogeneity of the Temporal Dynamics of Arctic Tundra Vegetation	GEOPHYSICAL RESEARCH LETTERS	45	17	9206	9215	10.1029/2018GL078820	Arctic tundra vegetation has largely been greening in recent decades, resulting in major changes to terrestrial ecosystems, with implications for surface energy balance, permafrost, carbon and water cycling, herbivore populations, and human land use. While general greening trends have been well-studied, more specific vegetation-temperature dynamics are spatially and temporally heterogeneous and c…
100	exclude_title	exclude_title	exclude_title	OG	KH	DM	exclude_title				WoS_Scopus											Renaut, S; Devred, E; Babin, M	2018	Northward Expansion and Intensification of Phytoplankton Growth During the Early Ice-Free Season in Arctic	GEOPHYSICAL RESEARCH LETTERS	45	19	10590	10598	10.1029/2018GL078995	In the last decades, reduction of the ice cover has been documented to affect the structure and the functioning of Arctic marine ecosystems. One direct consequence is earlier phytoplankton spring blooms and larger annual primary production compared with previous decades. However, the impact of changes in the dynamics of sea ice specifically on phytoplankton spring blooms, a major contributor of t…
101	exclude_abstract	include		EK	KH		exclude_full_text				WoS_Scopus	yes	yes	include	exclude_full_text	no clear outcome (vegetation effects on caribou movement)	no_outcome	MWT	no			Rickbeil, GJM; Hermosilla, T; Coops, NC; White, JC; Wulder, MA; Lantz, TC	2018	Changing northern vegetation conditions are influencing barren ground caribou (Rangifer tarandus groenlandicus) post-calving movement rates	JOURNAL OF BIOGEOGRAPHY	45	3	702	712	10.1111/jbi.13161	AimTo quantify changes in vegetation productivity over the past three decades across five barren ground caribou (Rangifer tarandus groenlandicus) herd ranges and assess how these changes are influencing caribou movement rates. LocationNorthwest Territories and Nunavut, Canada. MethodsAs an indicator of vegetation productivity, the enhanced vegetation index (EVI) was calculated on newly developed …
102	exclude_title	exclude_abstract		EK	KH		exclude_abstract				WoS_Scopus											Robinson, SI; McLaughlin, OB; Marteinsdottir, B; O'Gorman, EJ	2018	Soil temperature effects on the structure and diversity of plant and invertebrate communities in a natural warming experiment	JOURNAL OF ANIMAL ECOLOGY	87	3	634	646	10.1111/1365-2656.12798	1. Global warming is predicted to significantly alter species physiology, biotic interactions and thus ecosystem functioning, as a consequence of coexisting species exhibiting a wide range of thermal sensitivities. There is, however, a dearth of research examining warming impacts on natural communities. 2. Here, we used a natural warming experiment in Iceland to investigate the changes in above-g…
103	exclude_abstract	exclude_abstract		EK	KH		exclude_abstract				WoS_Scopus											Ross, MV; Alisauskas, RT; Douglas, DC; Kellett, DK; Drake, KL	2018	Density-dependent and phenological mismatch effects on growth and survival in lesser snow and Ross's goslings	JOURNAL OF AVIAN BIOLOGY	49	12			10.1111/jav.01748	Strong seasonality of high-latitude environments imposes temporal constraints on forage availability and quality for keystone herbivores in terrestrial arctic ecosystems, including hyper-abundant colonial geese. Changes in food quality due to intraspecific competition, or food availability relative to the breeding phenology of birds, may have consequences for growth and survival of young. We used…
104	exclude_title	exclude_abstract		EK	KH		exclude_abstract			168	WoS_Scopus											Roy, N; Bhiry, N; Woollett, J; Frechette, B	2018	Vegetation history since the mid-Holocene in northeastern Iceland	ECOSCIENCE	25	2	109	123	10.1080/11956860.2018.1443419	Palynological analysis of peat cores collected near two abandoned farms in the Svalbarostunga Valley of the pistilfjorour region of northeastern Iceland was used to reconstruct the mid-Holocene vegetation history and to distinguish climatic and anthropogenic impacts on terrestrial ecosystems since colonization. The first site, Hjalmarvik, is located along the coast of pistilfjorour, while Kuoa is…
105	exclude_title	exclude_title		EK	KH		exclude_title				WoS_Scopus											Rozenfeld, SB; Kirtaev, GV; Rogove, NV; Soloviev, MY; Gorchakovsky, AA; Bizin, MS; Demianets, SS	2018	ESTIMATION OF THE POPULATIONS STATUS AND HABITAT CONDITIONS OF ANSERIFORMES IN THE STATE NATURE RESERVE "GYDANSKY" (RUSSIA) USING ULTRALIGHT AVIATION	NATURE CONSERVATION RESEARCH	3		76	90	10.24189/ncr.2018.070	The Gydan Peninsula is one of the least explored and inaccessible Arctic regions in both the Yamalo-Nenetsky Autonomous Okrug and Russia as a whole. In 2016-2017 we conducted a survey of the Gydansky State Nature Reserve and adjacent areas. counted and assessed the quality of habitats of Anseriformes and their threats. The results of the study and the data volume obtained have proved the effectiv…
106	include	exclude_title		EK	KH		exclude_full_text				WoS_Scopus	yes	yes	include	exclude_full_text	boreal coniferous forest and fungal community/extracellular enzyme activity as response variables	no_outcome	MWT	no			Santalahti, M; Sun, H; Sietio, OM; Koster, K; Berninger, F; Laurila, T; Pumpanen, J; Heinonsalo, J	2018	Reindeer grazing alter soil fungal community structure and litter decomposition related enzyme activities in boreal coniferous forests in Finnish Lapland	APPLIED SOIL ECOLOGY	132		74	82	10.1016/j.apsoil.2018.08.013	Reindeer grazing in northern boreal zone affects forest floor vegetation heavily and alters the vegetation structure. However, the effect of grazing on soil fungal communities, which are intimately linked to plants, is not currently known. Therefore, our objectives were to investigate changes caused by reindeer grazing on soil fungal communities, litter decomposition rate and litter degrading ext…
107	exclude_title	exclude_title		EK	KH		exclude_title			169	WoS_Scopus											Sanz-Martin, M; Chierici, M; Mesa, E; Carrillo-de-Albornoz, P; Delgado-Huertas, A; Agusti, S; Reigstad, M; Kristiansen, S; Wassmann, PFJ; Duarte, CM	2018	Episodic Arctic CO2 Limitation in the West Svalbard Shelf	FRONTIERS IN MARINE SCIENCE	5				10.3389/fmars.2018.00221	The European Sector of the Arctic Ocean is characterized by low CO2 concentrations in seawater during spring and summer, largely due to strong biological uptake driven by extensive plankton blooms in spring. The spring plankton bloom is eventually terminated by nutrient depletion and grazing. However, low CO2 concentrations in seawater and low atmospheric resupply of CO2 can cause episodes during…
108	include	include		EK	KH		exclude_full_text				WoS_Scopus	yes	yes	include	exclude_full_text	musk ox exclosure effects on arthropod community	no_outcome	MWT	no			Schmidt, NM; Mosbacher, JB; Eitzinger, B; Vesterinen, EJ; Roslin, T	2018	High resistance towards herbivore-induced habitat change in a high Arctic arthropod community	BIOLOGY LETTERS	14	5			10.1098/rsbl.2018.0054	Mammal herbivores may exert strong impacts on plant communities, and are often key drivers of vegetation composition and diversity. We tested whether such mammal-induced changes to a high Arctic plant community are reflected in the structure of other trophic levels. Specifically, we tested whether substantial vegetation changes following the experimental exclusion of muskoxen (Ovibos moschatus) a…
109	exclude_abstract	exclude_abstract		EK	KH		exclude_abstract				WoS_Scopus											Schmidt, NM; Mosbacher, JB; Vesterinen, EJ; Roslin, T; Michelsen, A	2018	Limited dietary overlap amongst resident Arctic herbivores in winter: complementary insights from complementary methods	OECOLOGIA	187	3	689	699	10.1007/s00442-018-4147-x	Snow may prevent Arctic herbivores from accessing their forage in winter, forcing them to aggregate in the few patches with limited snow. In High Arctic Greenland, Arctic hare and rock ptarmigan often forage in muskox feeding craters. We therefore hypothesized that due to limited availability of forage, the dietary niches of these resident herbivores overlap considerably, and that the overlap inc…
110	exclude_title	exclude_title		EK	KH		exclude_title				WoS_Scopus											Schoenrock, KM; Vad, J; Muth, A; Pearce, DM; Rea, BR; Schofield, JE; Kamenos, NA	2018	Biodiversity of Kelp Forests and Coralline Algae Habitats in Southwestern Greenland	DIVERSITY-BASEL	10	4			10.3390/d10040117	All marine communities in Greenland are experiencing rapid environmental change, and to understand the effects on those structured by seaweeds, baseline records are vital. The kelp and coralline algae habitats along Greenland's coastlines are rarely studied, and we fill this knowledge gap for the area around Nuuk, west Greenland. Using subtidal swath surveys, photo-quadrats, and grab samples, we …
111	exclude_title	exclude_title		EK	KH		exclude_title				WoS_Scopus											Selz, V; Laney, S; Arnsten, AE; Lewis, KM; Lowry, KE; Joy-Warren, HL; Mills, MM; van Dijken, GL; Arrigo, KR	2018	Ice algal communities in the Chukchi and Beaufort Seas in spring and early summer: Composition, distribution, and coupling with phytoplankton assemblages	LIMNOLOGY AND OCEANOGRAPHY	63	3	1109	1133	10.1002/lno.10757	To understand the controls on distributions of ice algal communities in spring and the role of ice algae in under-ice bloom development through possible seeding, we sampled the ice and water column in the Chukchi and Beaufort Seas over spring and summer. Field observations showed that high springtime concentrations of bottom ice algal communities were released from the ice into the water column b…
112	exclude_title	exclude_title		EK	KH		exclude_title				WoS_Scopus											Sen, A; Astrom, EKL; Hong, WL; Portnov, A; Waage, M; Serov, P; Carroll, ML; Carroll, J	2018	Geophysical and geochemical controls on the megafaunal community of a high Arctic cold seep	BIOGEOSCIENCES	15	14	4533	4559	10.5194/bg-15-4533-2018	Cold-seep megafaunal communities around gas hydrate mounds (pingos) in the western Barents Sea (76 degrees N, 16 degrees E, similar to 400m depth) were investigated with high-resolution, geographically referenced images acquired with an ROV and towed camera. Four pingos associated with seabed methane release hosted diverse biological communities of mainly nonseep (background) species including co…
113	exclude_abstract	exclude_title		EK	KH		exclude_abstract			170	WoS_Scopus											Sheremetev, IS; Rozenfeld, SB	2018	Landscape Changes during the Pleistocene-Holocene Transition and Range Dynamics of Large Herbivorous Mammals of Northern Asia	ARID ECOSYSTEMS	8	4	245	253	10.1134/S207909611804011X	This work studies the effect of the reduction of steppe and tundra landscapes in Northern Asia during the Late Pleistocene and Holocene climatic changes on the ranges of large herbivorous mammals. The relationship between a complex of characteristics of herbivore species and their landscape was evaluated. It is found that not only the Mongolian gazelle, saiga, and musk ox, but also the snow sheep…
114	exclude_title	exclude_title		EK	KH		exclude_title				WoS_Scopus											Sochuliakova, L; Sienkiewicz, E; Hamerlik, L; Svitok, M; Fidlerova, D; Bitusik, P	2018	Reconstructing the Trophic History of an Alpine Lake (High Tatra Mts.) Using Subfossil Diatoms: Disentangling the Effects of Climate and Human Influence	WATER AIR AND SOIL POLLUTION	229	9			10.1007/s11270-018-3940-9	Diatom analysis was undertaken on a 200-year sediment record in an alpine lake (Popradsk, pleso, Tatra Mountains, Central Europe). Due to its remote character and well-documented human influence since the mid-nineteenth century, it allows a study of the relationship between anthropogenic pressures and diatom assemblages. Altogether, 122 diatom taxa of 40 genera were identified, and two major taxo…
115	exclude_title	exclude_title		EK	KH		exclude_title			171	WoS_Scopus											Soininen, EM; Barrio, I; Jepsen, JU; Ehrich, D; Ravolainen, VT; Speed, JDM	2018	Evidence of effects of herbivory on Arctic vegetation: a systematic map protocol	ENVIRONMENTAL EVIDENCE	7	1			10.1186/s13750-018-0135-1	Background: Along with climate change, herbivory is considered a main driver of ecosystem change in terrestrial Arctic environments. Understanding how herbivory influences the resilience of Arctic ecosystems to ongoing environmental changes is essential to inform policy and guide sustainable management practices. However, many studies indicate that the effects of herbivores on plants and ecosyste…
116	include	include		EK	KH		exclude_full_text			3460, 172	WoS_Scopus	yes	yes	include	exclude_full_text	no clear outcome (vegetation effects on rodent population dynamics)	no_outcome	MWT	no			Soininen, EM; Henden, JA; Ravolainen, VT; Yoccoz, NG; Brathen, KA; Killengreen, ST; Ims, RA	2018	Transferability of biotic interactions: Temporal consistency of arctic plant-rodent relationships is poor	ECOLOGY AND EVOLUTION	8	19	9697	9711	10.1002/ece3.4399	Variability in biotic interaction strength is an integral part of food web functioning. However, the consequences of the spatial and temporal variability of biotic interactions are poorly known, in particular for predicting species abundance and distribution. The amplitude of rodent population cycles (i.e., peak-phase abundances) has been hypothesized to be determined by vegetation properties in …
117	include	include		EK	KH		exclude_site_coordinates	Dovre		3584	WoS_Scopus	yes	yes	exclude_site_coordinates								Sorensen, MV; Graae, BJ; Hagen, D; Enquist, BJ; Nystuen, KO; Strimbeck, R	2018	Experimental herbivore exclusion, shrub introduction, and carbon sequestration in alpine plant communities	BMC ECOLOGY	18				10.1186/s12898-018-0185-9	Background: Shrub cover in arctic and alpine ecosystems has increased in recent decades, and is predicted to further increase with climate change. Changes in shrub abundance may alter ecosystem carbon (C) sequestration and storage, with potential positive feedback on global C cycling. Small and large herbivores may reduce shrub expansion and thereby counteract the positive feedback on C cycling, …
118	exclude_title	exclude_title		EK	KH		exclude_title				WoS_Scopus											Stark, S; Ylanne, H; Tolvanen, AT	2018	Long-term warming alters soil and enzymatic N:P stoichiometry in subarctic tundra	SOIL BIOLOGY & BIOCHEMISTRY	124		184	188	10.1016/j.soilbio.2018.06.016
119	include	include		EK	KH		exclude_site_coordinates	Fairbanks			WoS_Scopus	yes	yes	exclude_site_coordinates								Starr, L; Seefeldt, S; Zhang, MC; Rowell, J	2018	Sustainable livestock production in sub-arctic Alaska: Plant and soil responses to simulated intensively managed grazing	AGRICULTURE ECOSYSTEMS & ENVIRONMENT	255		12	19	10.1016/j.agee.2017.12.015	Managing a robust pasture ecosystem and optimizing available forage under sub-arctic conditions in interior Alaska is a challenge. The region is characterized by a short growing season, slow residue decomposition rates and undeveloped soils that are vulnerable to compaction and erosion. The goal of this research was to examine the relative and combined role of grazing mechanisms; herbivory, tramp…
120	exclude_title	exclude_title		EK	KH		exclude_title				WoS_Scopus											Stasko, AD; Bluhm, BA; Michel, C; Archambault, P; Majewski, A; Reist, JD; Swanson, H; Power, M	2018	Benthic-pelagic trophic coupling in an Arctic marine food web along vertical water mass and organic matter gradients	MARINE ECOLOGY PROGRESS SERIES	594		1	19	10.3354/meps12582	Understanding drivers of benthic-pelagic coupling in Arctic marine ecosystems is key to identifying benthic areas that may be sensitive to climate-driven changes in hydrography and surface production. We coupled algal biomass and sedimentary characteristics with stable isotope data for 113 fishes and invertebrates in the Canadian Beaufort Sea and Amundsen Gulf to examine how trophic structure was…
121	exclude_title	exclude_title		EK	KH		exclude_title				WoS_Scopus											Stoecker, DK; Lavrentyev, PJ	2018	Mixotrophic Plankton in the Polar Seas: A Pan-Arctic Review	FRONTIERS IN MARINE SCIENCE	5				10.3389/fmars.2018.00292	Polar marine ecosystems are characterized by low water temperatures, sea ice cover, and extreme annual variation in solar irradiance and primary productivity. A review of the available information from the Arctic suggests that mixotrophy (i.e., the combination of photosynthetic and phagotrophic modes of nutrition in one cell) is wide spread among plankton. In the central Arctic Ocean (AO) in summ…
122	include	include		EK	KH		include				WoS_Scopus	yes	yes	include	include			MWT	yes			Svensson, BM; Carlsson, BA; Melillo, JM	2018	Changes in species abundance after seven years of elevated atmospheric CO2 and warming in a Subarctic birch forest understorey, as modified by rodent and moth outbreaks	PEERJ	6				10.7717/peerj.4843	A seven-year long, two-factorial experiment using elevated temperatures (5 degrees C) and CO2 (concentration doubled compared to ambient conditions) designed to test the effects of global climate change on plant community composition was set up in a Subarctic ecosystem in northernmost Sweden. Using point-frequency analyses in permanent plots, an increased abundance of the deciduous Vaccinium myrt…
123	exclude_abstract	exclude_abstract		EK	KH		exclude_abstract			176	WoS_Scopus											Turney, S; Altshuler, I; Whyte, LG; Buddle, CM	2018	Macroinvertebrate and soil prokaryote communities in the forest-tundra ecotone of the Subarctic Yukon	POLAR BIOLOGY	41	8	1619	1633	10.1007/s00300-018-2330-5	The forest-tundra interface is the world's largest ecotone, and is globally important due to its biodiversity, climatic sensitivity, and natural resources. The ecological communities which characterize this ecotone, and which provide local and global ecosystem services, are affected by environmental variation at multiple scales. We explored correlations between environmental variables and macroin…
124	exclude_title	exclude_title		EK	KH		exclude_title			177	WoS_Scopus											van den Brink, NW; Scheiber, IBR; de Jong, ME; Braun, A; Arini, A; Basu, N; van den Berg, H; Komdeur, J; Loonen, MJJE	2018	Mercury associated neurochemical response in Arctic barnacle goslings (&ITBranta leucopsis&IT)	SCIENCE OF THE TOTAL ENVIRONMENT	624		1052	1058	10.1016/j.scitotenv.2017.12.191	There remains great concern over mercury pollution in the Arctic, though relatively little is known about impacts on biota that inhabit Arctic terrestrial systems. To help address this, the current study was performed with barnacle goslings (Branta leucopsis) from a coal mine-impacted site and a control site near Ny-Alesund, Spitsbergen (Svalbard). The works focused mainly on mercury, as coal con…
125	exclude_title	exclude_title		EK	KH		exclude_title				WoS_Scopus											Virkkala, AM; Virtanen, T; Lehtonen, A; Rinne, J; Luoto, M	2018	The current state of CO2 flux chamber studies in the Arctic tundra: A review	PROGRESS IN PHYSICAL GEOGRAPHY-EARTH AND ENVIRONMENT	42	2	162	184	10.1177/0309133317745784	The Arctic tundra plays an important role in the carbon cycle as it stores 50% of global soil organic carbon reservoirs. The processes (fluxes) regulating these stocks are predicted to change due to direct and indirect effects of climate change. Understanding the current and future carbon balance calls for a summary of the level of knowledge regarding chamber-derived carbon dioxide (CO2) flux stu…
126	include	exclude_title		EK	KH		exclude_full_text	only part of study sites included (point 126c)			WoS_Scopus	yes	yes	include	exclude_full_text	not relevant population -- focus on mycorrhizae	no_outcome	ICB	no			Vowles, T; Lindwall, F; Ekblad, A; Bahram, M; Furneaux, BR; Ryberg, M; Bjork, RG	2018	Complex effects of mammalian grazing on extramatrical mycelial biomass in the Scandes forest-tundra ecotone	ECOLOGY AND EVOLUTION	8	2	1019	1030	10.1002/ece3.3657	Mycorrhizal associations are widespread in high-latitude ecosystems and are potentially of great importance for global carbon dynamics. Although large herbivores play a key part in shaping subarctic plant communities, their impact on mycorrhizal dynamics is largely unknown. We measured extramatrical mycelial (EMM) biomass during one growing season in 16-year-old herbivore exclosures and unenclose…
127	exclude_title	exclude_title		EK	KH		exclude_title				WoS_Scopus											Wang, SQ; Liu, XB; Xu, SD; Wu, QY; You, CH; Monroig, O; Tocher, DR; Li, YY	2018	Total Replacement of Dietary Fish Oil with a Blend of Vegetable Oils in the Marine Herbivorous Teleost, Siganus canaliculatus	JOURNAL OF THE WORLD AQUACULTURE SOCIETY	49	4	692	702	10.1111/jwas.12434	To investigate the feasibility of total replacement of dietary fish oil (FO) with vegetable oils (VOs) and the optimal dietary polyunsaturated fatty acid (PUFA) level in the marine herbivorous teleost Siganus canaliculatus, six isonitrogenous (32%) and isolipidic (8%) diets were formulated. Control diet used FO as lipid source, whereas diets VO1-VO5 contained various blends of palm, soybean, rape…
128	exclude_abstract	exclude_abstract		EK	KH		exclude_abstract			181	WoS_Scopus											Weijers, S; Myers-Smith, IH; Loffler, J	2018	A WARMER AND GREENER COLD WORLD: SUMMER WARMING INCREASES SHRUB GROWTH IN THE ALPINE AND HIGH ARCTIC TUNDRA	ERDKUNDE	72	1	63	85	10.3112/erdkunde.2018.01.04	The Arctic and alpine biome is rapidly warming, which might be causing an encroachment of relatively tall woody shrub vegetation into tundra ecosystems, which will probably result in an overall positive feedback to climate warming. This encroachment is, however, believed to remain limited to the relatively warm parts of the biome, where taller shrubs may displace shorter species. Still, climate s…
129	exclude_title	exclude_abstract		EK	KH		exclude_abstract	meta-analysis			WoS_Scopus											Wheeler, HC; Hoye, TT; Svenning, JC	2018	Wildlife species benefitting from a greener Arctic are most sensitive to shrub cover at leading range edges	GLOBAL CHANGE BIOLOGY	24	1	212	223	10.1111/gcb.13837	Widespread expansion of shrubs is occurring across the Arctic. Shrub expansion will substantially alter arctic wildlife habitats. Identifying which wildlife species are most affected by shrubification is central to predicting future arctic community composition. Through meta-analysis, we synthesized the published evidence for effects of canopy-forming shrubs on birds and mammals in the Arctic and…
130	include	exclude_abstract		EK	KH		include				WoS_Scopus	yes	yes	include	include			MWT	yes			Wilmking, M; Buras, A; Lehejcek, J; Lange, J; Shetti, R; van der Maaten, E	2018	Influence of larval outbreaks on the climate reconstruction potential of an Arctic shrub	DENDROCHRONOLOGIA	49		36	43	10.1016/j.dendro.2018.02.010	Arctic shrubs have a strong potential for climate and environmental reconstructions in the chronically understudied regions of the high northern latitudes. The climate dynamics of these regions are important to understand because of large-scale feedbacks to the global climate system. However, little is known about other factors influencing shrub ring growth, possibly obscuring their climate signa…
131	exclude_title	exclude_title		EK	KH		exclude_title			182	WoS_Scopus											Wood, KA; Nuijten, RJM; Newth, JL; Haitjema, T; Vangeluwe, D; Ioannidis, P; Harrison, AL; Mackenzie, C; Hilton, GM; Nolet, BA; Rees, EC	2018	Apparent survival of an Arctic-breeding migratory bird over 44years of fluctuating population size	IBIS	160	2	413	430	10.1111/ibi.12521	Following increases in numbers during the second half of the 20th century, several Arctic-breeding migrant bird species are now undergoing sustained population declines. These include the northwest European population of Bewick's Swan Cygnus columbianus bewickii, which declined from c. 29000 birds on the wintering grounds in 1995 to 18000 in 2010. It is unclear whether this decrease reflects redu…
132	exclude_title	exclude_title		EK	KH		exclude_title				WoS_Scopus											Xu, X; Brekke, C; Doulgeris, AP; Melandso, F	2018	Numerical Analysis of Microwave Scattering from Layered Sea Ice Based on the Finite Element Method	REMOTE SENSING	10	9			10.3390/rs10091332	A two-dimensional scattering model based on the Finite Element Method (FEM) is built for simulating the microwave scattering of sea ice, which is a layered medium. The scattering problem solved by the FEM is formulated following a total- and scattered-field decomposition strategy. The model set-up is first validated with good agreements by comparing the results of the FEM with those of the small …
133	exclude_title	exclude_title		EK	KH		exclude_title				WoS_Scopus											Yamazaki, A; Nishimiya, Y; Tsuda, S; Togashi, K; Munehara, H	2018	Gene expression of antifreeze protein in relation to historical distributions of Myoxocephalus fish species	MARINE BIOLOGY	165	11			10.1007/s00227-018-3440-x	Gene expression of antifreeze proteins (AFPs) facilitates various species of fish to survive in near-freezing seawater. The marine sculpin genus Myoxocephalus (Teleostei; Perciformes) is widely distributed from Arctic to Subarctic and is known to express type I AFP. Here, we clarify gene structures and the antifreeze activity of three Myoxocephalus species and discuss their cold adaptation and th…
134	exclude_abstract	exclude_abstract		EK	KH		exclude_abstract				WoS_Scopus											Yan, YC; Yan, RR; Chen, JQ; Xin, XP; Eldridg, DJ; Shao, CL; Wang, X; Lv, SJ; Jin, DY; Chen, JQ; Guo, ZJ; Chen, BR; Xu, LJ	2018	Grazing modulates soil temperature and moisture in a Eurasian steppe	AGRICULTURAL AND FOREST METEOROLOGY	262		157	165	10.1016/j.agrformet.2018.07.011	Few studies have addressed the potential grazing effects on microclimate, such as surface temperature and moisture, and their feedback effects on grassland function. A continuous, approximately three-year long study was conducted in experimental plots of various grazing intensities, and in situ soil temperature and moisture were measured. The results indicated that grazing significantly altered s…
135	include	include		EK	KH		include	only part of study sites included (point 135a and 135b)			WoS_Scopus	yes	yes	include	include			BH, EMS	yes			Ylanne, H; Olofsson, J; Oksanen, L; Stark, S	2018	Consequences of grazer-induced vegetation transitions on ecosystem carbon storage in the tundra	FUNCTIONAL ECOLOGY	32	4	1091	1102	10.1111/1365-2435.13029	1. Large herbivores can control plant community composition and, under certain conditions, even induce vegetation shifts to alternative ecosystem states. As different plant assemblages maintain contrasting carbon (C) cycling patterns, herbivores have the potential to alter C sequestration at regional scales. Their influence is of particular interest in the Arctic tundra, where a large share of th…
136	exclude_title	exclude_title		EK	KH		exclude_title				WoS_Scopus											Yoon, JE; Yoo, KC; Macdonald, AM; Yoon, HI; Park, KT; Yang, EJ; Kim, HC; Lee, JI; Lee, MK; Jung, J; Park, J; Lee, J; Kim, S; Kim, SS; Kim, K; Kim, I	2018	Reviews and syntheses: Ocean iron fertilization experiments - past, present, and future looking to a future Korean Iron Fertilization Experiment in the Southern Ocean (KIFES) project	BIOGEOSCIENCES	15	19	5847	5889	10.5194/bg-15-5847-2018	Since the start of the industrial revolution, human activities have caused a rapid increase in atmospheric carbon dioxide (CO2) concentrations, which have, in turn, had an impact on climate leading to global warming and ocean acidification. Various approaches have been proposed to reduce atmospheric CO2. The Martin (or iron) hypothesis suggests that ocean iron fertilization (OIF) could be an effe…
137	exclude_title	exclude_title		EK	KH		exclude_title				WoS_Scopus											Amano K., Abe Y., Matsuno K., Yamaguchi A.	2018	Yearly comparison of the planktonic chaetognath community in the Chukchi Sea in the summers of 1991 and 2007	Polar Science					10.1016/j.polar.2018.11.011	In oceans worldwide, chaetognaths are the second most dominant zooplankton taxa and have vital transfer roles between herbivores and higher trophic organisms. Despite the chaetognaths’ importance, little is known regarding their ecology in the Chukchi Sea, where recent ice reduction is prominent in the Arctic Ocean. We made comparisons of the chaetognath abundance, biomass, community structure (t…
138	exclude_title	exclude_title		EK	KH		exclude_title				WoS_Scopus											Arashkevich E.G., Drits A.V., Pasternak A.F., Flint M.V., Demidov A.B., Amelina A.B., Kravchishina M.D., Sukhanova I.N., Shchuka S.A.	2018	Distribution and Feeding of Herbivorous Zooplankton in the Laptev Sea	Oceanology	58	3	381	395	10.1134/S0001437018030013	Sampling was conducted along the quasi meridional transect at 130° E from the Lena River estuary to northern deep-sea regions of the Laptev Sea in September 2015. The latitudinal zonality and the impact of river runoff are manifested in the temperature and salinity distribution, concentration of particulate organic matter, and the structure of plankton communities. The differences in the chl a co…
139	exclude_abstract	exclude_abstract		EK	KH		remove_duplicate			20	WoS_Scopus											Barboza P.S., Van Someren L.L., Gustine D.D., Syndonia Bret-Harte M.	2018	The nitrogen window for arctic herbivores: Plant phenology and protein gain of migratory caribou (Rangifer tarandus)	Ecosphere	9	1			10.1002/ecs2.2073	Terrestrial plants are often limited by nitrogen (N) in arctic systems, but constraints of N supply on herbivores are typically considered secondary to those of energy. We tested the hypothesis that forage N is more limiting than energy for arctic caribou by collecting key forages (three species of graminoids, three species of woody browse, and one genus of forb) over three summers in the migrato…
140	co-author	duplicate		EK	KH		remove_duplicate			22, 3325	WoS_Scopus											Barrio I.C., Lindén E., Te Beest M., Olofsson J., Rocha A., Soininen E.M., Alatalo J.M., Andersson T., Asmus A., Boike J., Bråthen K.A., Bryant J.P., Buchwal A., Bueno C.G., Christie K.S., Denisova Y.V., Egelkraut D., Ehrich D., Fishback L.A., Forbes B.C., Gartzia M., Grogan P., Hallinger M., Heijmans M.M.P.D., Hik D.S., Hofgaard A., Holmgren M., Høye T.T., Huebner D.C., Jónsdóttir I.S., Kaarlejä…	2018	Correction to: Background invertebrate herbivory on dwarf birch (Betula glandulosa-nana complex) increases with temperature and precipitation across the tundra biome (Polar Biology, (2017), 40, 11, (2265-2278), 10.1007/s00300-017-2139-7)	Polar Biology	41	8	1653	1654	10.1007/s00300-018-2305-6	The above mentioned article was originally scheduled for publication in the special issue on Ecology of Tundra Arthropods with guest editors Toke T. Høye. Lauren E. Culler. Erroneously, the article was published in Polar Biology, Volume 40, Issue 11, November, 2017. The publisher sincerely apologizes to the guest editors and the authors for the inconvenience caused. © 2018, Springer-Verlag GmbH G…
141	exclude_title	duplicate		EK	KH		remove_duplicate			23	WoS_Scopus											Barthelemy H., Stark S., Michelsen A., Olofsson J.	2018	Urine is an important nitrogen source for plants irrespective of vegetation composition in an Arctic tundra: Insights from a 15N-enriched urea tracer experiment	Journal of Ecology	106	1	367	378	10.1111/1365-2745.12820	Mammalian herbivores can strongly influence nitrogen (N) cycling and herbivore urine could be a central component of the N cycle in grazed ecosystems. Despite its potential role for ecosystem productivity and functioning, the fate of N derived from urine has rarely been investigated in grazed ecosystems. This study explored the fate of 15N-enriched urea in tundra sites that have been either light…
142	include	include		EK	KH		remove_duplicate			26	WoS_Scopus	yes	yes	exclude_site_coordinates								Bokhorst S., Berg M.P., Edvinsen G.K., Ellers J., Heitman A., Jaakola L., Mæhre H.K., Phoenix G.K., Tømmervik H., Bjerke J.W.	2018	Impact of multiple ecological stressors on a sub-arctic ecosystem: No interaction between extreme winter warming events, nitrogen addition and grazing	Frontiers in Plant Science	871				10.3389/fpls.2018.01787	Climate change is one of many ongoing human-induced environmental changes, but few studies consider interactive effects between multiple anthropogenic disturbances. In coastal sub-arctic heathland, we quantified the impact of a factorial design simulating extreme winter warming (WW) events (7 days at 6–7°C) combined with episodic summer nitrogen (+N) depositions (5 kg N ha-1) on plant winter phys…
143	exclude_title	duplicate		EK	KH		remove_duplicate			29	WoS_Scopus											Buda J., Olszanowski Z., Wierzgo? M., Zawierucha K.	2018	Tardigrades and oribatid mites in bryophytes from geothermally active lava fields (Krafla, Iceland) and the description of Pilatobius islandicus sp. Nov. (eutardigrada)	Polish Polar Research	39	3	425	453	10.24425/118755	In polar regions, apart from tundra and glaciers, geothermally active areas with elevated temperatures are important elements of ecosystems. One such geothermally active region characterized by mosaic ecosystems and vast areas covered by recent lava fields is Iceland. The aim of our study was to explore the diversity of invertebrates inhabiting geothermally active lava fields in the Krafla area (…
144	exclude_title	exclude_title		EK	KH		exclude_title				WoS_Scopus											Bueno de Mesquita C.P., Tillmann L.S., Bernard C.D., Rosemond K.C., Molotch N.P., Suding K.N.	2018	Topographic heterogeneity explains patterns of vegetation response to climate change (1972–2008) across a mountain landscape, Niwot Ridge, Colorado	Arctic, Antarctic, and Alpine Research	50	1			10.1080/15230430.2018.1504492	The distributions of biomes worldwide are predicted to shift as vegetation tracks climate change. Ecologists often use coarse-scale climate models to predict these shifts along broad elevational and latitudinal gradients, but these assessments could fail to capture important dynamics by ignoring fine-scale heterogeneity. We ask how the elevational ranges of vegetation types have changed in a moun…
145	exclude_title	exclude_title		EK	KH		exclude_title			33	WoS_Scopus											Connell P.E., Michel C., Meisterhans G., Arrigo K.R., Caron D.A.	2018	Phytoplankton and bacterial dynamics on the Chukchi Sea Shelf during the spring?summer transition	Marine Ecology Progress Series	602		49	62	10.3354/meps12692	Climate warming is exerting significant change on the physical properties of the Arctic Ocean, which in turn has marked consequences for the biology of the region. The Chukchi Sea is notable for its species richness as a consequence of a nutrient-rich shelf region that supports substantial primary production. However, little is known about the carbon transformations at the base of the food web in…
146	exclude_title	exclude_title		EK	KH		remove_duplicate			34	WoS_Scopus											Croitor R., Obada T.	2018	On the presence of Late Pleistocene wapiti, Cervus canadensis Erxleben, 1777 (Cervidae, Mammalia) in the Palaeolithic site Clim?u?i II (Moldova)	Contributions to Zoology	87	1	1	10		This article reports antler remains from the Late Paleolithic site of Clim?u?i II (Republic of Moldova) confirming the presence of wapiti Cervus canadensis in the Late Pleistocene of Western Eurasia. The occurrence of wapiti in the East Carpathian area by 20 ky BP coincides with the local extinction of Megaloceros giganteus, Crocuta spelaea, and Ursus spelaeus, and substitution of local forest re…
147	exclude_title	duplicate		EK	KH		remove_duplicate			35	WoS_Scopus											Czortek P., Delimat A., Dyderski M.K., Zi?ba A., Jagodzi?ski A.M., Jaroszewicz B.	2018	Climate change, tourism and historical grazing influence the distribution of Carex lachenalii Schkuhr – A rare arctic-alpine species in the Tatra Mts	Science of the Total Environment	618		1628	1637	10.1016/j.scitotenv.2017.10.001	Mountain vegetation is highly specialized to harsh climatic conditions and therefore is sensitive to any change in environment. The rarest and most vulnerable plants occurring in alpine regions are expected to respond rapidly to environmental changes. An example of such a species is Carex lachenalii subsp. lachenalii Schkuhr, which occurs in Poland on only a few isolated sites in the Tatra Mts. T…
148	exclude_title	include		EK	KH		exclude_site_text				WoS_Scopus	yes	no	exclude_site_text				JM	no			Davis E.L., Gedalof Z.	2018	Limited prospects for future alpine treeline advance in the Canadian Rocky Mountains	Global Change Biology	24	10	4489	4504	10.1111/gcb.14338	Treeline advance has occurred throughout the twentieth century in mountainous regions around the world; however, local variation and temporal lags in responses to climate warming indicate that the upper limits of some treelines are not necessarily in climatic equilibrium. These observations suggest that factors other than climate are constraining tree establishment beyond existing treelines. Usin…
149	exclude_title	exclude_title		EK	KH		exclude_title				WoS_Scopus											Desmars N., Perignon Y., Ducrozet G., Guerin C.A., Grilli S.T., Ferrant P.	2018	Phase-resolved reconstruction algorithm and deterministic prediction of nonlinear ocean waves from spatiooral optical measurements	Proceedings of the International Conference on Offshore Mechanics and Arctic Engineering - OMAE	7B				10.1115/OMAE2018-78367	We investigate a nonlinear phase-resolved reconstruction algorithm and models for the deterministic prediction of ocean waves based on a large number of spatiooral optical measurements of surface elevations. We consider a single sensor (e.g., LIDAR, stereo-video, etc.) mounted on a fixed offshore structure and remotely measuring fields of free surface elevations. Assuming a uniform distribution o…
150	include	duplicate		EK	KH		remove_duplicate			45	WoS_Scopus											Egelkraut D., Kardol P., De Long J.R., Olofsson J.	2018	The role of plant–soil feedbacks in stabilizing a reindeer-induced vegetation shift in subarctic tundra	Functional Ecology	32	8	1959	1971	10.1111/1365-2435.13113	Herbivory can drive vegetation into different states of productivity and community composition, and these changes may be stable over time due to historical contingency effects. Interactions with abiotic and biotic soil components can contribute to such long-term legacies in plant communities through stabilizing positive feedbacks. We studied the role of plant–soil feedbacks in maintaining vegetat…
151	exclude_title	exclude_title		EK	KH		remove_duplicate			46	WoS_Scopus											Fernández-Méndez M., Olsen L.M., Kauko H.M., Meyer A., Rösel A., Merkouriadi I., Mundy C.J., Ehn J.K., Johansson A.M., Wagner P.M., Ervik Å., Sorrell B.K., Duarte P., Wold A., Hop H., Assmy P.	2018	Algal hot spots in a changing Arctic Ocean: Sea-ice ridges and the snow-ice interface	Frontiers in Marine Science	5	MAR			10.3389/fmars.2018.00075	During the N-ICE2015 drift expedition north-west of Svalbard, we observed the establishment and development of algal communities in first-year ice (FYI) ridges and at the snow-ice interface. Despite some indications of being hot spots for biological activity, ridges are under-studied largely because they are complex structures that are difficult to sample. Snow infiltration communities can grow a…
152	exclude_title	exclude_title		EK	KH		exclude_title				WoS_Scopus											Gast R.J., Fay S.A., Sanders R.W.	2018	Mixotrophic activity and diversity of Antarctic marine protists in austral summer	Frontiers in Marine Science	5	FEB			10.3389/fmars.2018.00013	Identifying putative mixotrophic protist species in the environment is important for understanding their behavior, with the recovery of these species in culture essential for determining the triggers of feeding, grazing rates, and overall impact on bacterial standing stocks. In this project, mixotroph abundances determined using tracer ingestion in water and sea ice samples collected in the Ross …
153	exclude_title	exclude_title		EK	KH		exclude_title			52	WoS_Scopus											Gharajehdaghipour T., Roth J.D.	2018	Predators attract prey through ecosystem engineering in the arctic	Ecosphere	9	1			10.1002/ecs2.2077	Predators can affect prey through mechanisms other than predation; for example, redistributing resources could modify habitats favorably for other organisms. We examined Arctic fox (Vulpes lagopus) den use by lemmings, their primary prey, in winter during a year of low lemming densities. We found winter nests, which are built by lemmings under snow, on 69% of fox dens, whereas no control sites ha…
154	exclude_title	exclude_title		EK	KH		exclude_title				WoS_Scopus											Hufthammer A.K., Svendsen J.I., Pavlov P.	2018	Animals and humans in the European Russian Arctic towards the end of the last Ice Age and during the mid-Holocene time	Boreas					10.1111/bor.12343	Here, we present and discuss results from geo-archaeological and palaeo-zoological investigations at the Palaeolithic site Pymva Shor, in the Russian Arctic. As many as 3324 vertebrate fauna remains were recovered during two excavations. This includes bones of mammals, birds and fish. Radiocarbon dates were obtained from 26 specimens. The results show ages in the range 30–3 cal. ka BP. Hare and r…
155	exclude_title	exclude_abstract		EK	KH		remove_duplicate			66	WoS_Scopus											Koltz A.M., Schmidt N.M., Høye T.T.	2018	Differential arthropod responses to warming are altering the structure of arctic communities	Royal Society Open Science	5	4			10.1098/rsos.171503	The Arctic is experiencing some of the fastest rates of warming on the planet. Although many studies have documented responses to such warming by individual species, the idiosyncratic nature of these findings has prevented us from extrapolating them to community-level predictions. Here, we leverage the availability of a long-term dataset from Zackenberg, Greenland (593 700 specimens collected bet…
156	exclude_title	correction of original paper, no abstract		EK	KH		remove_correction				WoS_Scopus											Kristensen J.A., Metcalfe D.B., Rousk J.	2018	Correction to: The biogeochemical consequences of litter transformation by insect herbivory in the Subarctic: a microcosm simulation experiment (Biogeochemistry, (2018), 138, 3, (323-336), 10.1007/s10533-018-0448-8)	Biogeochemistry	138	3	337		10.1007/s10533-018-0451-0	Table 1 contained a typesetting error in the initial online publication. The original article has been corrected. © 2018, Springer International Publishing AG, part of Springer Nature.
157	exclude_title	exclude_abstract		EK	KH		remove_duplicate			75	WoS_Scopus											Lezama-Núñez P.R., Santos-Fita D., Vallejo J.R.	2018	Herding ecologies and ongoing plant domestication processes in the Americas	Frontiers in Plant Science	9				10.3389/fpls.2018.00649	Understanding both domestication processes and agricultural practices is an interdisciplinary endeavor. Ethnographic research is potentially helpful for reconstructing past events. Such knowledge is also crucial for documenting the links between biological and cultural diversity, as well as for future purposes such as innovation in food production and sustainability. Here, we review six ethnograp…
158	exclude_title	exclude_title		EK	KH		exclude_title				WoS_Scopus											Maar M., Butenschön M., Daewel U., Eggert A., Fan W., Hjøllo S.S., Hufnagl M., Huret M., Ji R., Lacroix G., Peck M.A., Radtke H., Sailley S., Sinerchia M., Skogen M.D., Travers-Trolet M., Troost T.A., van de Wolfshaar K.	2018	Responses of summer phytoplankton biomass to changes in top-down forcing: Insights from comparative modelling	Ecological Modelling	376		54	67	10.1016/j.ecolmodel.2018.03.003	The present study describes the responses of summer phytoplankton biomass to changes in top-down forcing (expressed as zooplankton mortality) in three ecosystems (the North Sea, the Baltic Sea and the Nordic Seas) across different 3D ecosystem models. In each of the model set-ups, we applied the same changes in the magnitude of mortality (±20%) of the highest trophic zooplankton level (Z1). Model…
159	exclude_title	exclude_title		EK	KH		remove_duplicate			84	WoS_Scopus											Mills M.M., Brown Z.W., Laney S.R., Ortega-Retuerta E., Lowry K.E., van Dijken G.L., Arrigo K.R.	2018	Nitrogen limitation of the summer phytoplankton and heterotrophic prokaryote communities in the Chukchi Sea	Frontiers in Marine Science	5	OCT			10.3389/fmars.2018.00362	Major changes to Arctic marine ecosystems have resulted in longer growing seasons with increased phytoplankton production over larger areas. In the Chukchi Sea, the high productivity fuels intense benthic denitrification creating a nitrogen (N) deficit that is transported through the Arctic to the Atlantic Ocean, where it likely fuels N fixation. Given the rapid pace of environmental change and t…
160	include	duplicate		EK	KH		remove_duplicate			87	WoS_Scopus											Morrissette-Boileau C., Boudreau S., Tremblay J.-P., Côté S.D.	2018	Revisiting the role of migratory caribou in the control of shrub expansion in northern Nunavik (Québec, Canada)	Polar Biology	41	9	1845	1853	10.1007/s00300-018-2325-2	Widespread shrub expansion has been observed at the circumpolar scale in response to climate change. This phenomenon could be inhibited by large herbivores through selective browsing that reduces shrub growth. Our objective was to assess the dynamics of shrub species in the Deception Bay area, in Nunavik (Québec, Canada), a region in the summer range of the Rivière-aux-Feuilles migratory caribou …
161	include	include		EK	KH		include				WoS_Scopus	yes	yes	include	include			BH	yes			Mosbacher J.B., Michelsen A., Stelvig M., Hjermstad-Sollerud H., Schmidt N.M.	2018	Muskoxen Modify Plant Abundance, Phenology, and Nitrogen Dynamics in a High Arctic Fen	Ecosystems					10.1007/s10021-018-0323-4	Herbivores are key drivers of vegetation dynamics in most ecosystems. However, the effect of high arctic herbivores on vegetation dynamics throughout a growing season is not well understood. In this study, we examine the impacts of a large dominant herbivore in the tundra ecosystem, the muskox, Ovibos moschatus, using exclosures established in a fen in high Arctic Greenland. Using weekly sampling…
162	exclude_title	exclude_title		EK	KH		remove_duplicate			89	WoS_Scopus											Müller O., Seuthe L., Bratbak G., Paulsen M.L.	2018	Bacterial response to permafrost derived organic matter input in an Arctic Fjord	Frontiers in Marine Science	5	AUG			10.3389/fmars.2018.00263	The warming of the Arctic causes increased riverine discharge, coastal erosion, and the thawing of permafrost. Together, this is leading to an increased wash out of terrestrial dissolved organic matter (tDOM) into the coastal Arctic ecosystems. This tDOM may be anticipated to affect both carbon and nutrient flow in the microbial food web and microbial community composition, but there are few stud…
163	exclude_title	exclude_abstract		EK	KH		exclude_abstract				WoS_Scopus											Muscente A.D., Boag T.H., Bykova N., Schiffbauer J.D.	2018	Environmental disturbance, resource availability, and biologic turnover at the dawn of animal life	Earth-Science Reviews	177		248	264	10.1016/j.earscirev.2017.11.019	The radiation of early animals involved dramatic turnover of both eukaryotic life and marine environments, but the factors that drove origination and extinction of taxa remain controversial. Herein, we review current interpretations and uncertainties regarding changes in biodiversity through the Ediacaran Period. Overall, ocean oxygenation and/or ecological restructuring of ecosystems may have dr…
164	exclude_title	exclude_abstract		EK	KH		remove_duplicate			92	WoS_Scopus											Nyffeler M., ?ekercio?lu Ç.H., Whelan C.J.	2018	Insectivorous birds consume an estimated 400–500 million tons of prey annually	Science of Nature	105	2019-08-07			10.1007/s00114-018-1571-z	In this paper, we present an estimate of the predation impact of the global population of insectivorous birds based on 103 (for the most part) published studies of prey consumption (kg ha?1 season?1) of insectivorous birds in seven biome types. By extrapolation—taking into account the global land cover of the various biomes—an estimate of the annual prey consumption of the world’s insectivorous b…
165	exclude_title	exclude_title		EK	KH		remove_duplicate			96	WoS_Scopus											Paulsen M.L., Seuthe L., Reigstad M., Larsen A., Cape M.R., Vernet M.	2018	Asynchronous accumulation of organic carbon and nitrogen in the Atlantic Gateway to the Arctic Ocean	Frontiers in Marine Science	5	NOV			10.3389/fmars.2018.00416	Nitrogen (N) is the main limiting nutrient for biological production in the Arctic Ocean. While dissolved inorganic N (DIN) is well studied, the substantial pool of N bound in organic matter (OM) and its bioavailability in the system is rarely considered. Covering a full annual cycle, we here follow N and carbon (C) content in particulate (P) and dissolved (D) OM within the Atlantic water inflow …
166	exclude_title	include		EK	KH		exclude_full_text	no abstract			WoS_Scopus	yes	no	NA	exclude_full_text	this is a news story	no_outcome_data	JM	no			Pennisi E.	2018	Restoring lost grazers could help blunt climate change Rewilded landscapes could be cooler, less fire prone	Science	362	6413	388		10.1126/science.362.6413.388	[No abstract available]
167	exclude_title	exclude_abstract		EK	KH		exclude_abstract				WoS_Scopus											Pistone D., Lindgren M., Holmstad P., Ellingsen N.K., Kongshaug H., Nilsen F., Skorping A.	2018	The role of chewing lice (Phthiraptera: Philopteridae) as intermediate hosts in the transmission of Hymenolepis microps (Cestoda: Cyclophyllidea) from the willow ptarmigan Lagopus lagopus (Aves: Tetraonidae)	Journal of Helminthology	92	1	49	55	10.1017/S0022149X17000141	The cestode Hymenolepis microps is an intestinal parasite of tetraonid birds, including the willow ptarmigan (Lagopus lagopus). This parasite is able to maintain a high prevalence and intensity throughout the year, even in a subarctic environment in bird populations with relatively low host densities, indicating effective transmission routes. Willow ptarmigan consume mainly vegetal material and a…
168	exclude_title	duplicate		EK	KH		remove_duplicate			104	WoS_Scopus											Roy N., Bhiry N., Woollett J., Fréchette B.	2018	Vegetation History since the Mid-Holocene in Northeastern Iceland	Ecoscience	25	2	109	123	10.1080/11956860.2018.1443419	Palynological analysis of peat cores collected near two abandoned farms in the Svalbarstunga Valley of the istilfjorur region of northeastern Iceland was used to reconstruct the mid-Holocene vegetation history and to distinguish climatic and anthropogenic impacts on terrestrial ecosystems since colonization. The first site, Hjálmarvík, is located along the coast of istilfjorur, while Kúá is locat…
169	exclude_title	exclude_title		EK	KH		remove_duplicate			107	WoS_Scopus											Sanz-Martín M., Chierici M., Mesa E., Carrillo-de-Albornoz P., Delgado-Huertas A., Agustí S., Reigstad M., Kristiansen S., Wassmann P.F.J., Duarte C.M.	2018	Episodic arctic CO2 limitation in the west svalbard shelf	Frontiers in Marine Science	5	JUL			10.3389/fmars.2018.00221	The European Sector of the Arctic Ocean is characterized by low CO2 concentrations in seawater during spring and summer, largely due to strong biological uptake driven by extensive plankton blooms in spring. The spring plankton bloom is eventually terminated by nutrient depletion and grazing. However, low CO2 concentrations in seawater and low atmospheric resupply of CO2 can cause episodes during…
170	exclude_title	exclude_title		EK	KH		remove_duplicate			113	WoS_Scopus											Sheremetev I.S., Rozenfeld S.B.	2018	Landscape Changes during the Pleistocene–Holocene Transition and Range Dynamics of Large Herbivorous Mammals of Northern Asia	Arid Ecosystems	8	4	245	253	10.1134/S207909611804011X	Abstract: This work studies the effect of the reduction of steppe and tundra landscapes in Northern Asia during the Late Pleistocene and Holocene climatic changes on the ranges of large herbivorous mammals. The relationship between a complex of characteristics of herbivore species and their landscape was evaluated. It is found that not only the Mongolian gazelle, saiga, and musk ox, but also the …
171	exclude_title	duplicate		EK	KH		remove_duplicate			115	WoS_Scopus											Soininen E.M., Barrio I., Jepsen J.U., Ehrich D., Ravolainen V.T., Speed J.D.M.	2018	Evidence of effects of herbivory on Arctic vegetation: A systematic map protocol	Environmental Evidence	7	1			10.1186/s13750-018-0135-1	Background: Along with climate change, herbivory is considered a main driver of ecosystem change in terrestrial Arctic environments. Understanding how herbivory influences the resilience of Arctic ecosystems to ongoing environmental changes is essential to inform policy and guide sustainable management practices. However, many studies indicate that the effects of herbivores on plants and ecosyste…
172	include	duplicate		EK	KH		remove_duplicate			116, 3460	WoS_Scopus											Soininen E.M., Henden J.-A., Ravolainen V.T., Yoccoz N.G., Bråthen K.A., Killengreen S.T., Ims R.A.	2018	Transferability of biotic interactions: Temporal consistency of arctic plant–rodent relationships is poor	Ecology and Evolution	8	19	9697	9711	10.1002/ece3.4399	Variability in biotic interaction strength is an integral part of food web functioning. However, the consequences of the spatial and temporal variability of biotic interactions are poorly known, in particular for predicting species abundance and distribution. The amplitude of rodent population cycles (i.e., peak-phase abundances) has been hypothesized to be determined by vegetation properties in …
173	exclude_abstract	exclude_abstract		EK	KH		exclude_abstract				WoS_Scopus											Stoessel M., Elmhagen B., Vinka M., Hellström P., Angerbjörn A.	2018	The fluctuating world of a tundra predator guild: bottom-up constraints overrule top-down species interactions in winter	Ecography					10.1111/ecog.03984	Global warming is predicted to change ecosystem functioning and structure in Arctic ecosystems by strengthening top-down species interactions, i.e. predation pressure on small herbivores and interference between predators. Yet, previous research is biased towards the summer season. Due to greater abiotic constraints, Arctic ecosystem characteristics might be more pronounced in winter. Here we tes…
174	exclude_title	exclude_title		EK	KH		exclude_title				WoS_Scopus											Thompson J.A., Koenig L.S.	2018	Vegetation phenology in Greenland and links to cryospheric change	Annals of Glaciology					10.1017/aog.2018.24	Recent greening of vegetation across the Arctic is associated with warming temperatures, hydrologic change and shorter snow-covered periods. Here we investigated trends for a subset of arctic vegetation on the island of Greenland. Vegetation in Greenland is unique due to its close proximity to the Greenland Ice Sheet and its proportionally large connection to the Greenlandic population through th…
175	include	co-author	include	EK	KH	IK	include				WoS_Scopus	yes	yes	include	include			MH	yes			Tuomi M., Stark S., Hoset K.S., Väisänen M., Oksanen L., Murguzur F.J.A., Tuomisto H., Dahlgren J., Bråthen K.A.	2018	Herbivore Effects on Ecosystem Process Rates in a Low-Productive System	Ecosystems					10.1007/s10021-018-0307-4	Mammalian herbivores shape the structure and function of many nutrient-limited or low-productive terrestrial ecosystems through modification of plant communities and plant–soil feedbacks. In the tundra biome, mammalian herbivores may both accelerate and decelerate plant biomass growth, microbial activity and nutrient cycling, that is, ecosystem process rates. Selective foraging and associated dec…
176	exclude_title	exclude_abstract		EK	KH		remove_duplicate			123	WoS_Scopus											Turney S., Altshuler I., Whyte L.G., Buddle C.M.	2018	Macroinvertebrate and soil prokaryote communities in the forest–tundra ecotone of the Subarctic Yukon	Polar Biology	41	8	1619	1633	10.1007/s00300-018-2330-5	The forest–tundra interface is the world’s largest ecotone, and is globally important due to its biodiversity, climatic sensitivity, and natural resources. The ecological communities which characterize this ecotone, and which provide local and global ecosystem services, are affected by environmental variation at multiple scales. We explored correlations between environmental variables and macroin…
177	exclude_title	exclude_title		EK	KH		remove_duplicate			124	WoS_Scopus											van den Brink N.W., Scheiber I.B.R., de Jong M.E., Braun A., Arini A., Basu N., van den Berg H., Komdeur J., Loonen M.J.J.E.	2018	Mercury associated neurochemical response in Arctic barnacle goslings (Branta leucopsis)	Science of the Total Environment	624		1052	1058	10.1016/j.scitotenv.2017.12.191	There remains great concern over mercury pollution in the Arctic, though relatively little is known about impacts on biota that inhabit Arctic terrestrial systems. To help address this, the current study was performed with barnacle goslings (Branta leucopsis) from a coal mine-impacted site and a control site near Ny-Ålesund, Spitsbergen (Svalbard). The works focused mainly on mercury, as coal con…
178	exclude_abstract	exclude_abstract		EK	KH		exclude_abstract				WoS_Scopus											Vowles T., Björk R.G.	2018	Implications of evergreen shrub expansion in the Arctic	Journal of Ecology					10.1111/1365-2745.13081	Arctic shrub expansion is occurring across large parts of the tundra biome and its potential ecological repercussions have been widely discussed. But while the term “shrub expansion” often implicitly refers to an increase in tall, deciduous species such as birch and willow, several studies have also found a strong increase in evergreen dwarf shrubs in response to warming, a fact which has receive…
179	exclude_abstract	exclude_title		EK	KH		exclude_abstract				WoS_Scopus											W?grzyn M.H., Wietrzyk P., Lehmann-Konera S., Chmiel S., Cykowska-Marzencka B., Polkowska ?.	2018	Annual variability of heavy metal content in Svalbard reindeer faeces as a result of dietary preferences	Environmental Science and Pollution Research	25	36	36693	36701	10.1007/s11356-018-3479-8	During both winter and summer, Svalbard reindeer selectively feed on different types of vegetation that are not only a source of nutritional value, but also a place of heavy metal accumulation. In the present study, the content of cadmium, chromium, copper, iron, lead, nickel, manganese, and zinc in reindeer excrement was measured. The main aims were to determine the seasonal content of several h…
180	exclude_title	exclude_abstract		EK	KH		exclude_abstract				WoS_Scopus											Wang J., Wang P., Aryal A., Meng X., Weladji R.B.	2018	Summer habitat selection of reindeer (rangifer tarandus) governs on the unprotected forest and human interface in China	Ekologia Bratislava	37	2	112	121	10.2478/eko-2018-0011	The habitat selection by animals depends on different environmental and anthropogenic factors such as the season, climate, and the life cycle stage. Here, we have presented the summer habitat selection strategy of reindeer (Rangifer tarandus) in the unprotected forest area from the Northern arctic region of China. In summer 2012, we investigated a total of 72 used and 162 non-used plots in the re…
181	exclude_title	exclude_abstract		EK	KH		remove_duplicate			128	WoS_Scopus											Weijers S., Myers-Smith I.H., Löffler J.	2018	A Warmer and greener cold world: Summer warming increases shrub growth in the alpine and high arctic tundra	Erdkunde	72	1	63	85	10.3112/ERDKUNDE.2018.01.04	The Arctic and alpine biome is rapidly warming, which might be causing an encroachment of relatively tall woody shrub vegetation into tundra ecosystems, which will probably result in an overall positive feedback to climate warming. This encroachment is, however, believed to remain limited to the relatively warm parts of the biome, where taller shrubs may displace shorter species. Still, climate s…
182	exclude_title	duplicate		EK	KH		remove_duplicate			131	WoS_Scopus											Wood K.A., Nuijten R.J.M., Newth J.L., Haitjema T., Vangeluwe D., Ioannidis P., Harrison A.L., Mackenzie C., Hilton G.M., Nolet B.A., Rees E.C.	2018	Apparent survival of an Arctic-breeding migratory bird over 44 years of fluctuating population size	Ibis	160	2	413	430	10.1111/ibi.12521	Following increases in numbers during the second half of the 20th century, several Arctic-breeding migrant bird species are now undergoing sustained population declines. These include the northwest European population of Bewick's Swan Cygnus columbianus bewickii, which declined from c. 29 000 birds on the wintering grounds in 1995 to 18 000 in 2010. It is unclear whether this decrease reflects re…
183	exclude_title	exclude_abstract		EK	KH		exclude_abstract				WoS_Scopus											Albon, SD; Irvine, RJ; Halvorsen, O; Langvatn, R; Loe, LE; Ropstad, E; Veiberg, V; Van Der Wal, R; Bjorkvoll, EM; Duff, EI; Hansen, BB; Lee, AM; Tveraa, T; Stien, A	2017	Contrasting effects of summer and winter warming on body mass explain population dynamics in a food-limited Arctic herbivore	GLOBAL CHANGE BIOLOGY	23	4	1374	1389	10.1111/gcb.13435	The cumulative effects of climate warming on herbivore vital rates and population dynamics are hard to predict, given that the expected effects differ between seasons. In the Arctic, warmer summers enhance plant growth which should lead to heavier and more fertile individuals in the autumn. Conversely, warm spells in winter with rainfall (rain-on-snow) can cause `icing', restricting access to for…
184	exclude_title	exclude_title		EK	KH		exclude_title				WoS_Scopus											Ameryk, A; Jankowska, KM; Kalinowska, A; Weslawski, JM	2017	Comparison of bacterial production in the water column between two Arctic fjords, Hornsund and Kongsfjorden (West Spitsbergen)	OCEANOLOGIA	59	4	496	507	10.1016/j.oceano.2017.06.001	Bacterial production and the accompanying environmental factors were measured in the water columns of two Arctic fjords during the cruise in July and August 2013. Water samples were collected at six stations located in the central part of Hornsund and Kongsfjorden. In Hornsund, where average water temperatures were 1.25-fold lower than in Kongsfjorden, the bacterial production was twice as high (…
185	exclude_title	exclude_title		EK	KH		remove_duplicate			328	WoS_Scopus											Anderson, NJ; Saros, JE; Bullard, JE; Cahoon, SMP; Mcgowan, S; Bagshaw, EA; Barry, CD; Bindler, R; Burpee, BT; Carrivick, JL; Fowler, RA; Fox, AD; Fritz, SC; Giles, ME; Hamerlik, L; Ingeman-Nielsen, T; Law, AC; Mernild, SH; Northington, RM; Osburn, CL; Pla-Rabes, S; Post, E; Telling, J; Stroud, DA; Whiteford, EJ; Yallop, ML; Yde, JC	2017	The Arctic in the Twenty-First Century: Changing Biogeochemical Linkages across a Paraglacial Landscape of Greenland	BIOSCIENCE	67	2	118	133	10.1093/biosci/biw158	The Kangerlussuaq area of southwest Greenland encompasses diverse ecological, geomorphic, and climate gradients that function over a range of spatial and temporal scales. Ecosystems range from the microbial communities on the ice sheet and moisture-stressed terrestrial vegetation (and their associated herbivores) to freshwater and oligosaline lakes. These ecosystems are linked by a dynamic glacio…
186	exclude_title	exclude_title		EK	KH		exclude_title				WoS_Scopus											Anderson, SR; Menden-Deuer, S	2017	Growth, Grazing, and Starvation Survival in Three Heterotrophic Dinoflagellate Species	JOURNAL OF EUKARYOTIC MICROBIOLOGY	64	2	213	225	10.1111/jeu.12353	To assess the effects of fluctuating prey availability on predator population dynamics and grazing impact on phytoplankton, we measured growth and grazing rates of three heterotrophic dinoflagellate speciesOxyrrhis marina, Gyrodinium dominans and Gyrodinium spiralebefore and after depriving them of phytoplankton prey. All three dinoflagellate species survived long periods (>10d) without algal pre…
187	exclude_title	exclude_abstract		EK	KH		exclude_abstract				WoS_Scopus											Andriuzzi, WS; Wall, DH	2017	Responses of belowground communities to large aboveground herbivores: Meta-analysis reveals biome-dependent patterns and critical research gaps	GLOBAL CHANGE BIOLOGY	23	9	3857	3868	10.1111/gcb.13675	The importance of herbivore-plant and soil biota-plant interactions in terrestrial ecosystems is amply recognized, but the effects of aboveground herbivores on soil biota remain challenging to predict. To find global patterns in belowground responses to vertebrate herbivores, we performed a meta-analysis of studies that had measured abundance or activity of soil organisms inside and outside field…
188	exclude_title	exclude_title		EK	KH		exclude_title				WoS_Scopus											Ardyna, M; Babin, M; Devred, E; Forest, A; Gosselin, M; Raimbault, P; Tremblay, JE	2017	Shelf-basin gradients shape ecological phytoplankton niches and community composition in the coastal Arctic Ocean (Beaufort Sea)	LIMNOLOGY AND OCEANOGRAPHY	62	5	2113	2132	10.1002/lno.10554	The contiguous Arctic shelf is the green belt of the Arctic Ocean. Phytoplankton dynamics in this environment are driven by extreme physical gradients and by rapid climate change, which influence light and nutrient availability as well as the growth and ecological characteristics of phytoplankton. A large dataset collected across the Canadian Beaufort Shelf during summer 2009 was analyzed to asse…
189	exclude_title	exclude_abstract		EK	KH		exclude_abstract				WoS_Scopus											Bardsen, BJ	2017	Evolutionary responses to a changing climate: Implications for reindeer population viability	ECOLOGY AND EVOLUTION	7	15	5833	5844	10.1002/ece3.3119	If we want to understand how climate change affects long-lived organisms, we must know how individuals allocate resources between current reproduction and survival. This trade-off is affected by expected environmental conditions, but the extent to which density independent (DI) and density dependent (DD) processes interact in shaping individual life histories is less clear. Female reindeer (or ca…
190	exclude_title	exclude_abstract		EK	KH		exclude_abstract				WoS_Scopus											Bardsen, BJ; Naess, MW; Singh, NJ; Ahman, B	2017	The Pursuit of Population Collapses: Long-Term Dynamics of Semi-Domestic Reindeer in Sweden	HUMAN ECOLOGY	45	2	161	175	10.1007/s10745-016-9880-3	Spatiotemporal reindeer population fluctuations are a result of multiple factors that working in concert affecting the structure and functioning of many Arctic and Sub-Arctic ecosystems. We investigated the population dynamics of Swedish semi-domestic reindeer from 1945 to 2012 at the reindeer herding district-level (Sameby) to identify possible population collapses or declines. We also explored …
191	co-author	duplicate? Correction versions above	include	EK	KH	IK	exclude_full_text	62 study sites. But some location were outsite the study area: 191c,e, g, o, be,bf,bg,bh,bi &bj		3324	WoS_Scopus	yes	yes	include	exclude_full_text	measured direct signs of herbivory but not effects on plants	no_outcome	MWT	yes			Barrio, IC; Linden, E; Te Beest, M; Olofsson, J; Rocha, A; Soininen, EM; Alatalo, JM; Andersson, T; Asmus, A; Boike, J; Brathen, KA; Bryant, JP; Buchwal, A; Bueno, CG; Christie, KS; Denisova, YV; Egelkraut, D; Ehrich, D; Fishback, L; Forbes, BC; Gartzia, M; Grogan, P; Hallinger, M; Heijmans, MMPD; Hik, DS; Hofgaard, A; Holmgren, M; Hoye, TT; Huebner, DC; Jonsdottir, IS; Kaarlejarvi, E; Kumpula, T…	2017	Background invertebrate herbivory on dwarf birch (Betula glandulosa-nana complex) increases with temperature and precipitation across the tundra biome	POLAR BIOLOGY	40	11	2265	2278	10.1007/s00300-017-2139-7	Chronic, low intensity herbivory by invertebrates, termed background herbivory, has been understudied in tundra, yet its impacts are likely to increase in a warmer Arctic. The magnitude of these changes is however hard to predict as we know little about the drivers of current levels of invertebrate herbivory in tundra. We assessed the intensity of invertebrate herbivory on a common tundra plant, …
192	include	include		EK	KH		include				WoS_Scopus	yes	yes	include	include			KM	yes			Barthelemy, H; Stark, S; Kytoviita, MM; Olofsson, J	2017	Grazing decreases N partitioning among coexisting plant species	FUNCTIONAL ECOLOGY	31	11	2051	2060	10.1111/1365-2435.12917	1. Herbivores play a key role in shaping ecosystem structure and functions by influencing plant and microbial community composition and nutrient cycling. 2. This study investigated the long-term effects of herbivores on plant resource acquisition. We explored differences in the natural delta N-15 signatures in plant, microbial and soil N pools, and examined mycorrhizal colonization in two tundra …
193	exclude_title	exclude_title		EK	KH		exclude_title				WoS_Scopus											Begin, PN; Vincent, WF	2017	Permafrost thaw lakes and ponds as habitats for abundant rotifer populations	ARCTIC SCIENCE	3	2	354	377	10.1139/as-2016-0017	Thermokarst lakes and ponds were sampled across a range of permafrost landscapes in subarctic Quebec (Nunavik, Canada) to compare their rotifer and other zooplankton characteristics with a set of rock-basin lakes and ponds in the region. A total of 24 rotifer species were identified, with an average of seven taxa per waterbody. Rotifer abundance was an order of magnitude higher in the thaw ponds …
194	exclude_title	exclude_title		EK	KH		exclude_title				WoS_Scopus											Berteaux, D; Gauthier, G; Domine, F; Ims, RA; Lamoureux, SF; Levesque, E; Yoccoz, N	2017	Effects of changing permafrost and snow conditions on tundra wildlife: critical places and times	ARCTIC SCIENCE	3	2	65	90	10.1139/as-2016-0023	The change of water phase around 0 degrees C has considerable impacts on wildlife ecology because liquid and solid water strongly differ in their insulating capability, mechanical resistance, and light reflectance. Freeze and melt events thus have strong ecological relevance, particularly in the Arctic where snow and ice are omnipresent and their conditions are changing due to climate warming. We…
195	exclude_title	exclude_title		EK	KH		exclude_title			312	WoS_Scopus											Beumer, LT; Varpe, O; Hansen, BB	2017	Cratering behaviour and faecal C:N ratio in relation to seasonal snowpack characteristics in a High-Arctic ungulate	POLAR RESEARCH	36				10.1080/17518369.2017.1286121	Snow and ice determine winter forage availability for Arctic herbivores. Winter precipitation is anticipated to increase, and icing following warm spells and rain-on-snow (ROS) are likely to become more frequent. While this may reduce herbivore survival, fecundity and population growth, we can also expect behavioural and dietary responses. Here, we tested predictions from optimal foraging theory …
196	exclude_abstract	exclude_abstract		EK	KH		exclude_abstract				WoS_Scopus											Bignon-lau, O; Catz, N; Berlioz, E; Veiberg, V; Strand, O; Merceron, G	2017	Dental microwear textural analyses to track feeding ecology of reindeer: a comparison of two contrasting populations in Norway	MAMMAL RESEARCH	62	1	111	120	10.1007/s13364-016-0304-y	Using dental microwear textural analysis, we aim to explore variations in feeding habits within and between wild reindeer populations (Rangifer tarandus) in Norway. Specimens from the two wild reindeer areas of Knutsho and Hardangervidda were hunted between late August and the end of September 2014, and found to share very similar topological and ecological characteristics (continental alpine tun…
197	include	exclude_abstract		EK	KH		exclude_full_text	2 main study sites, arctic tundra and arctic boreal, a few study points below arctic but most study points in the arctic, the arctic boreal (coast of Norway) site is related to herbivory, the vegetation is desribed as birch forest, healthland - human affected, and the vegatation studied is dwarf shrubs, so does this fit into the tundra/forest ecotone - hence include? YES - but include only the ev…		3461	WoS_Scopus	yes	yes	include	exclude_full_text	not relevant population: boreal biome (they also have Svalbard sites but they do not report herbivory there)	no_population	KM	yes			Bjerke, JW; Treharne, R; Vikhamar-Schuler, D; Karlsen, SR; Ravolainen, V; Bokhorst, S; Phoenix, GK; Bochenek, Z; Tommervik, H	2017	Understanding the drivers of extensive plant damage in boreal and Arctic ecosystems: Insights from field surveys in the aftermath of damage	SCIENCE OF THE TOTAL ENVIRONMENT	599		1965	1976	10.1016/j.scitotenv.2017.05.050	The exact cause of population dieback in nature is often challenging to identify retrospectively. Plant research in northern regions has in recent decades been largely focussed on the opposite trend, namely increasing populations and higher productivity. However, a recent unexpected decline in remotely-sensed estimates of terrestrial Arctic primary productivity suggests that warmer northern lands…
198	exclude_title	exclude_abstract		EK	KH		exclude_abstract				WoS_Scopus											Boertje, RD; Gardner, CL; Ellis, MM; Bentzen, TW; Gross, JA	2017	Demography of an Increasing Caribou Herd With Restricted Wolf Control	JOURNAL OF WILDLIFE MANAGEMENT	81	3	429	448	10.1002/jwmg.21209	Understanding the limiting factors of a prey population is important before and during predator control programs, and optimal intensive management of an increasing prey population requires formal recognition of a sustainable population size. The migratory Fortymile caribou (Rangifer tarandus) herd in Alaska reached a low of approximately 6,000 caribou during 1973-1975. To regain peak numbers of a…
199	include	include		EK	KH		include			3462	WoS_Scopus	yes	yes	include	include			KM	yes			Brathen, KA; Ravolainen, VT; Stien, A; Tveraa, T; Ims, RA	2017	Rangifer management controls a climate-sensitive tundra state transition	ECOLOGICAL APPLICATIONS	27	8	2416	2427	10.1002/eap.1618	Rangifer (caribou/reindeer) management has been suggested to mitigate the temperature-driven transition of Arctic tundra into a shrubland state, yet how this happens is uncertain. Here we study this much focused ecosystem state transition in riparian areas, where palatable willows (Salix) are dominant tall shrubs and highly responsive to climate change. For the state transition to take place, sma…
200	exclude_title	exclude_title		EK	KH		exclude_title				WoS_Scopus											Brown, TA; Assmy, P; Hop, H; Wold, A; Belt, ST	2017	Transfer of ice algae carbon to ice-associated amphipods in the high-Arctic pack ice environment	JOURNAL OF PLANKTON RESEARCH	39	4	664	674	10.1093/plankt/fbx030	Sympagic (ice-associated) amphipods channel carbon into the marine ecosystem. With Arctic sea ice extent in decline, it is becoming increasingly important to quantify this transfer of sympagic energy. Recently, a method for quantifying sympagic particulate organic carbon (iPOC) in filtered water samples was proposed based on the abundances of the Arctic sea ice biomarker IP25. Here, we tested the…
201	exclude_title	exclude_title		EK	KH		exclude_title				WoS_Scopus											Brown, TA; Belt, ST	2017	Biomarker-based H-Print quantifies the composition of mixed sympagic and pelagic algae consumed by Artemia sp.	JOURNAL OF EXPERIMENTAL MARINE BIOLOGY AND ECOLOGY	488		32	37	10.1016/j.jembe.2016.12.007	Quantifying the importance of sea ice microalgae as a food source in Arctic ecosystems is becoming an increasingly important research objective as sea ice extent and thickness continue to reduce. Recently, the analysis of certain diatom-derived highly branched isoprenoid (HBI) lipid biomarkers has provided a means of qualitatively distinguishing between sympagic (sea ice) and pelagic algae in Arc…
202	exclude_title	exclude_title		EK	KH		exclude_title				WoS_Scopus											Bunse, C; Pinhassi, J	2017	Marine Bacterioplankton Seasonal Succession Dynamics	TRENDS IN MICROBIOLOGY	25	6	494	505	10.1016/j.tim.2016.12.013	Bacterioplankton (bacteria and archaea) are indispensable regulators of global element cycles owing to their unique ability to decompose and remineralize dissolved organic matter. These microorganisms in surface waters worldwide exhibit pronounced seasonal succession patterns, governed by physicochemical factors (e.g., light, climate, and nutrient loading) that are determined by latitude and dist…
203	exclude_title	exclude_abstract		EK	KH		exclude_abstract				WoS_Scopus											Burke, JL; Bohlmann, J; Carroll, AL	2017	Consequences of distributional asymmetry in a warming environment: invasion of novel forests by the mountain pine beetle	ECOSPHERE	8	4			10.1002/ecs2.1778	The range of many Holarctic forest insects does not comprise the entire range of their hosts, as they are often limited to more southern latitudes by the adverse effects of cold temperatures. Global climate warming has led to the increased potential for forest insects to invade novel habitats of native hosts within the same landmass. The mountain pine beetle (MPB; Dendroctonus ponderosae) has rec…
204	exclude_title	exclude_title		EK	KH		exclude_title				WoS_Scopus											Cerqueira-Cezar, CK; Thompson, PC; Verma, SK; Mowery, J; Calero-Bernal, R; Murata, FH; Sinnett, DR; Van Hemert, C; Rosenthal, BM; Dubey, JP	2017	Morphological and molecular characterization of Sarcocystis arctica-like sarcocysts from the Arctic fox (Vulpes lagopus) from Alaska, USA	PARASITOLOGY RESEARCH	116	7	1871	1878	10.1007/s00436-017-5462-6	The muscles of herbivores commonly harbor sarcocysts of parasites belonging to species in the genus Sarcocystis, but such muscle parasites are rare in carnivores. Here, we report Sarcocystis arctica-like sarcocysts in muscles of Arctic foxes (Vulpes lagopus) from Alaska, USA, for the first time. The tongues of 56 foxes were examined for Sarcocystis infection using several methods. Sarcocystis bra…
205	exclude_abstract	exclude_title		EK	KH		exclude_abstract				WoS_Scopus											Chang, JF; Ciais, P; Viovy, N; Soussana, JF; Klumpp, K; Sultan, B	2017	Future productivity and phenology changes in European grasslands for different warming levels: implications for grassland management and carbon balance	CARBON BALANCE AND MANAGEMENT	12				10.1186/s13021-017-0079-8	Background: Europe has warmed more than the global average (land and ocean) since pre-industrial times, and is also projected to continue to warm faster than the global average in the twenty-first century. According to the climate models ensemble projections for various climate scenarios, annual mean temperature of Europe for 2071-2100 is predicted to be 1-5.5 degrees C higher than that for 1971-…
206	exclude_title	exclude_title		EK	KH		exclude_title			314	WoS_Scopus											Cleary, AC; Soreide, JE; Freese, D; Niehoff, B; Gabrielsen, TM	2017	Feeding by Calanus glacialis in a high arctic fjord: potential seasonal importance of alternative prey	ICES JOURNAL OF MARINE SCIENCE	74	7	1937	1946	10.1093/icesjms/fsx106	The copepod species Calanus glacialis is an important component of arctic marine food webs, where it is the numerically dominant zooplankton grazer and serves as a major prey item for fish, seabirds, and other predators. These copepods are typically considered to be phytoplanktivorous, although they are also known to feed on microzooplankton, and little is known about their diet in fall and winte…
207	exclude_title	exclude_abstract		EK	KH		exclude_abstract				WoS_Scopus											Dalerum, F; Dalen, L; Frojd, C; Lecomte, N; Lindgren, A; Meijer, T; Pecnerova, P; Angerbjorn, A	2017	Spatial variation in Arctic hare (Lepus arcticus) populations around the Hall Basin	POLAR BIOLOGY	40	10	2113	2118	10.1007/s00300-017-2116-1	Arctic environments have relatively simple ecosystems. Yet, we still lack knowledge of the spatio-temporal dynamics of many Arctic organisms and how they are affected by local and regional processes. The Arctic hare (Lepus arcticus) is a large lagomorph endemic to high Arctic environments in Canada and Greenland. Current knowledge about this herbivore is scarce and the temporal and spatial dynami…
208	exclude_title	exclude_title		EK	KH		exclude_title				WoS_Scopus											Davenport, JM; Hossack, BR; Fishback, L	2017	Additive impacts of experimental climate change increase risk to an ectotherm at the Arctic's edge	GLOBAL CHANGE BIOLOGY	23	6	2262	2271	10.1111/gcb.13543	Globally, Arctic and Subarctic regions have experienced the greatest temperature increases during the last 30 years. These extreme changes have amplified threats to the freshwater ecosystems that dominate the landscape in many areas by altering water budgets. Several studies in temperate environments have examined the adaptive capacity of organisms to enhance our understanding of the potential re…
209	exclude_abstract	exclude_title		EK	KH		exclude_abstract				WoS_Scopus											De Frenne, P; Brunet, J; Cougnon, M; Decocq, G; Graae, BJ; Hagenblad, J; Hermy, M; Kolb, A; Lemke, IH; Ma, SY; Orczewska, A; Plue, J; Vranckx, G; Wulf, M; Verheyen, K	2017	Biological Flora of the British Isles: Milium effusum	JOURNAL OF ECOLOGY	105	3	839	858	10.1111/1365-2745.12744	1. This account presents information on all aspects of the biology of Milium effusum L. (Wood Millet) that are relevant to understanding its ecological characteristics and behaviour. The main topics are presented within the standard framework of the Biological Flora of the British Isles: distribution, habitat, communities, responses to biotic factors, responses to environment, structure and physi…
210	exclude_title	exclude_abstract		EK	KH		exclude_abstract				WoS_Scopus											de Jong, ME; Scheiber, IBR; van den Brink, NW; Braun, A; Matson, KD; Komdeur, J; Loonen, MJJE	2017	Indices of stress and immune function in Arctic barnacle goslings (Branta leucopsis) were impacted by social isolation but not a contaminated grazing environment	SCIENCE OF THE TOTAL ENVIRONMENT	601		132	141	10.1016/j.scitotenv.2017.05.183	In many areas around the Arctic remains and spoil heaps of old mines can be found, which have been abandoned after their heydays. Runoff from tailings of these abandoned mines can directly contaminate the local environment with elevated concentrations of trace metals. Few studies have investigated the possible negative effects of contaminants on Arctic terrestrial animals that use these areas. Tr…
211	exclude_title	exclude_title		EK	KH		exclude_title				WoS_Scopus											Deibel, D; Saunders, PA; Stevens, CJ	2017	Seasonal phenology of appendicularian tunicates in the North Water, northern Baffin Bay	POLAR BIOLOGY	40	6	1289	1310	10.1007/s00300-016-2053-4	Appendicularian tunicates are marine, gelatinous zooplankton that are important grazers of protists and phytoplankton in Arctic polynyas. However, little is known at the seasonal scale about their life cycle and population phenology in the Arctic. The temporal and spatial pattern of abundance and biomass, body size, and maturity stage were determined over two cruises representing an entire produc…
212	exclude_title	exclude_abstract		EK	KH		exclude_abstract			316	WoS_Scopus											Descamps, S; Aars, J; Fuglei, E; Kovacs, KM; Lydersen, C; Pavlova, O; Pedersen, AO; Ravolainen, V; Strom, H	2017	Climate change impacts on wildlife in a High Arctic archipelago - Svalbard, Norway	GLOBAL CHANGE BIOLOGY	23	2	490	502	10.1111/gcb.13381	The Arctic is warming more rapidly than other region on the planet, and the northern Barents Sea, including the Svalbard Archipelago, is experiencing the fastest temperature increases within the circumpolar Arctic, along with the highest rate of sea ice loss. These physical changes are affecting a broad array of resident Arctic organisms as well as some migrants that occupy the region seasonally.…
213	exclude_title	exclude_title		EK	KH		exclude_title				WoS_Scopus											Drits, AV; Pasternak, AF; Flint, MV	2017	Distribution and Grazing of Dominant Zooplankton Species in the Ob Estuary: Influence of the Runoff Regime	ESTUARIES AND COASTS	40	4	1082	1095	10.1007/s12237-016-0201-2	Major interactions between terrestrial and marine environments in the Kara Sea occur within the estuaries of the largest Siberian rivers, the Ob and Yenisei. Mesozooplankton community plays an important role in the transformation of allochthonous organic matter. All published data on zooplankton activity in the Ob Estuary have been obtained for the period of decreased river discharge. The aim of …
214	exclude_title	exclude_title		EK	KH		exclude_title			317	WoS_Scopus											Elliott, S; Jeffery, N; Hunke, E; Deal, C; Jin, MB; Wang, SL; Smith, EE; Oestreicher, S	2017	Strategies for the Simulation of Sea Ice Organic Chemistry: Arctic Tests and Development	GEOSCIENCES	7	3			10.3390/geosciences7030052	A numerical mechanism connecting ice algal ecodynamics with the buildup of organic macromolecules is tested within modeled pan-Arctic brine channels. The simulations take place offline in a reduced representation of sea ice geochemistry. Physical driver quantities derive from the global sea ice code CICE, including snow cover, thickness and internal temperature. The framework is averaged over ten…
215	exclude_title	exclude_title		EK	KH		exclude_title				WoS_Scopus											Elliott, SM; Ashjian, CJ; Feng, ZX; Jones, B; Chen, CS; Zhang, Y	2017	Physical control of the distributions of a key Arctic copepod in the Northeast Chukchi Sea	DEEP-SEA RESEARCH PART II-TOPICAL STUDIES IN OCEANOGRAPHY	144		37	51	10.1016/j.dsr2.2016.10.001	The Chukchi Sea is a highly advective regime dominated by a barotropically driven northward flow modulated by wind driven currents that reach the bottom boundary layer of this shallow environment. A general northward gradient of decreasing temperature and food concentration leads to geographically divergent copepod growth and development rates between north and south. The physics of this system e…
216	co-author	include	include	EK	KH	IK	include			318	WoS_Scopus	yes	yes	include	include			KM	yes			Eskelinen, A; Kaarlejarvi, EI; Olofsson, J	2017	Herbivory and nutrient limitation protect warming tundra from lowland species' invasion and diversity loss	GLOBAL CHANGE BIOLOGY	23	1	245	255	10.1111/gcb.13397	Herbivory and nutrient limitation can increase the resistance of temperature-limited systems to invasions under climate warming. We imported seeds of lowland species to tundra under factorial treatments of warming, fertilization, herbivore exclusion and biomass removal. We show that warming alone had little impact on lowland species, while exclusion of native herbivores and relaxation of nutrient…
217	exclude_title	include		EK	KH		include				WoS_Scopus	yes	yes	include	include			OG	yes			Fauchald, P; Park, T; Tommervik, H; Myneni, R; Hausner, VH	2017	Arctic greening from warming promotes declines in caribou populations	SCIENCE ADVANCES	3	4			10.1126/sciadv.1601365	The migratory tundra caribou herds in North America follow decadal population cycles, and browsing from abundant caribou could be expected to counteract the current climate-driven expansion of shrubs in the circumpolar tundra biome. We demonstrate that the sea ice cover in the Arctic Ocean has provided a strong signal for climate-induced changes on the adjacent caribou summer ranges, outperformin…
218	include	exclude_abstract		EK	KH		exclude_full_text				WoS_Scopus	yes	yes	include	exclude_full_text	cafeteria test, no effect of herbivory on plants	no_outcome	KM	no	RB	exclude_full_text	Fauteux, D; Slevan-Tremblay, G; Gauthier, G; Berteaux, D	2017	Feeding preference of brown lemmings (Lemmus trimucronatus) for plant parts of Arctic willow (Salix arctica)	POLAR BIOLOGY	40	11	2329	2334	10.1007/s00300-017-2147-7	Food availability has been proposed to be a factor driving population fluctuations of lemmings in the Arctic. In contrast with previous studies, a recent analysis of faecal pellets and stomach contents of brown lemmings (Lemmus trimucronatus) reported a surprisingly high proportion (34-56%) of willows (Salix spp.) in their diet during both summer and winter in the Canadian high Arctic. To better …
219	exclude_title	exclude_title		EK	KH		exclude_title				WoS_Scopus											Fernandez, CE; Rejas, D	2017	Effects of UVB radiation on grazing of two cladocerans from high-altitude Andean lakes	PLOS ONE	12	4			10.1371/journal.pone.0174334	Climate change and water extraction may result in increased exposition of the biota to ultraviolet -B radiation (UVB) in high-altitude Andean lakes. Although exposition to lethal doses in these lakes is unlikely, sub-lethal UVB doses may have strong impacts in key compartments such as zooplankton. Here, we aimed at determining the effect of sub-lethal UVB doses on filtration rates of two cladocer…
220	exclude_title	exclude_title		EK	KH		exclude_title				WoS_Scopus											Finlayson-Trick, ECL; Getz, LJ; Elaine, PD; Thornbury, M; Lamoureux, E; Cook, J; Langille, MGI; Murray, LE; McCormick, C; Rohde, JR; Cheng, ZY	2017	Taxonomic differences of gut microbiomes drive cellulolytic enzymatic potential within hind-gut fermenting mammals	PLOS ONE	12	12			10.1371/journal.pone.0189404	Host diet influences the diversity and metabolic activities of the gut microbiome. Previous studies have shown that the gut microbiome provides a wide array of enzymes that enable processing of diverse dietary components. Because the primary diet of the porcupine, Erethizon dorsatum, is lignified plant material, we reasoned that the porcupine microbiome would be replete with enzymes required to d…
221	exclude_title	exclude_title		EK	KH		exclude_title				WoS_Scopus											Finstad, AG; Nilsen, EB; Hendrichsen, DK; Schmidt, NM	2017	Catchment vegetation and temperature mediating trophic interactions and production in plankton communities	PLOS ONE	12	4			10.1371/journal.pone.0174904	Climatic factors influence the interactions among trophic levels in an ecosystem in multiple ways. However, whereas most studies focus on single factors in isolation, mainly due to interrelation and correlation among drivers complicating interpretation and analyses, there are still only few studies on how multiple ecosystems respond to climate related factors at the same time. Here, we use a hier…
222	exclude_title	exclude_title		EK	KH		exclude_title				WoS_Scopus											Fox, AD; Elmberg, J; Tombre, IM; Hessel, R	2017	Agriculture and herbivorous waterfowl: a review of the scientific basis for improved management	BIOLOGICAL REVIEWS	92	2	854	877	10.1111/brv.12258	Swans, geese and some ducks (Anatidae) are obligate herbivores, many are important quarry species and all contribute to a variety of ecosystem services. Population growth and shifting ranges have led to increasing proximity to man and thus increasing conflicts. We review and synthesize the role of these birds as herbivores on agricultural land (cropland, rotational grassland and pasture) and othe…
223	exclude_title	exclude_title		EK	KH		exclude_title				WoS_Scopus											Franze, G; Lavrentyev, PJ	2017	Microbial food web structure and dynamics across a natural temperature gradient in a productive polar shelf system	MARINE ECOLOGY PROGRESS SERIES	569		89	102	10.3354/meps12072	Recent rapid climate change in the Arctic has profound effects on polar marine ecosystems. In this study, we used time-for-space substitution to evaluate possible plankton responses to sea ice reduction and rising sea temperatures. The microbial food web was examined across a natural temperature gradient in the Barents Sea and adjacent waters (70-78.5 degrees N; - 1.8 to 8.6 degrees C) during dif…
224	exclude_title	exclude_title		EK	KH		exclude_title				WoS_Scopus											Givnish, TJ; Kriebel, R	2017	Causes of ecological gradients in leaf margin entirety: Evaluating the roles of biomechanics, hydraulics, vein geometry, and bud packing	AMERICAN JOURNAL OF BOTANY	104	3	354	366	10.3732/ajb.1600287	PREMISE OF THE STUDY: A recent commentary by Edwards et al. (Am. J. Bot. 103: 975-978) proposed that constraints imposed by the packing of young leaves in buds could explain the positive association between non-entire leaf margins and latitude but did not thoroughly consider alternative explanations. METHODS: We review the logic and evidence underlying six major hypotheses for the functional sign…
225	exclude_title	exclude_title		EK	KH		exclude_title				WoS_Scopus											Gluchowska, M; Trudnowska, E; Goszczko, I; Kubiszyn, AM; Blachowiak-Samolyk, K; Walczowski, W; Kwasniewski, S	2017	Variations in the structural and functional diversity of zooplankton over vertical and horizontal environmental gradients en route to the Arctic Ocean through the Fram Strait	PLOS ONE	12	2			10.1371/journal.pone.0171715	A multi-scale approach was used to evaluate which spatial gradient of environmental variability is the most important in structuring zooplankton diversity in the West Spitsbergen Current (WSC). The WSC is the main conveyor of warm and biologically rich Atlantic water to the Arctic Ocean through the Fram Strait. The data set included 85 stratified vertical zooplankton samples (obtained from depths…
226	exclude_abstract	exclude_abstract		EK	KH		exclude_abstract				WoS_Scopus											Gustine, D; Barboza, P; Adams, L; Griffith, B; Cameron, R; Whitten, K	2017	Advancing the match-mismatch framework for large herbivores in the Arctic: Evaluating the evidence for a trophic mismatch in caribou	PLOS ONE	12	2			10.1371/journal.pone.0171807	Climate- induced shifts in plant phenology may adversely affect animals that cannot or do not shift the timing of their reproductive cycle. The realized effect of potential trophic " mismatches " between a consumer and its food varies with the degree to which species rely on dietary income and stored capital. Large Arctic herbivores rely heavily on maternal capital to reproduce and give birth nea…
227	exclude_title	exclude_title		EK	KH		exclude_title				WoS_Scopus											Hablutzel, PI; Vanhove, MPM; Deschepper, P; Gregoir, AF; Roose, AK; Volckaert, FAM; Raeymaekers, JAM	2017	Parasite escape through trophic specialization in a species flock	JOURNAL OF EVOLUTIONARY BIOLOGY	30	7	1437	1445	10.1111/jeb.13111	Adaptive radiation occurs when species diversify rapidly to occupy an array of ecological niches. As opportunities for parasite infection and transmission may greatly vary among these niches, adaptive radiation is expected to be associated with a turnover of the parasite community. As major agents of natural and sexual selection, parasites may play a central role in host diversification. The stud…
228	exclude_title	exclude_title		EK	KH		exclude_title				WoS_Scopus											Hayes, TB; Hansen, M	2017	From silent spring to silent night: Agrochemicals and the anthropocene	ELEMENTA-SCIENCE OF THE ANTHROPOCENE	5				10.1525/elementa.246	We are now living in the Anthropocene, the first time in Earth's history when synthetic chemicals-created by humans-are damaging the planet and contributing to a major loss of biodiversity. Pesticides are a particular problem in this regard. Agricultural practices changed dramatically following World War II. Methods for the production of nitrogen for manufacturing explosives were adapted for use …
229	include	include		EK	KH		exclude_full_text			322, 3350	WoS_Scopus	yes	no	NA	exclude_full_text	laboratory experiment, samples collected in nature, but no coordinates or information of the ecological context given	no_population	JM	no			Heggenes, J; Odland, A; Chevalier, T; Ahlberg, J; Berg, A; Larsson, H; Bjerketvedt, DK	2017	Herbivore grazing-or trampling? Trampling effects by a large ungulate in cold high-latitude ecosystems	ECOLOGY AND EVOLUTION	7	16	6423	6431	10.1002/ece3.3130	Mammalian herbivores have important top-down effects on ecological processes and landscapes by generating vegetation changes through grazing and trampling. For free-ranging herbivores on large landscapes, trampling is an important ecological factor. However, whereas grazing is widely studied, low-intensity trampling is rarely studied and quantified. The cold-adapted northern tundra reindeer (Rang…
230	exclude_title	exclude_abstract		EK	KH		exclude_abstract			323, 3463	WoS_Scopus											Henden, JA; Ims, RA; Fuglei, E; Pedersen, AO	2017	Changed Arctic-alpine food web interactions under rapid climate warming: implication for ptarmigan research	WILDLIFE BIOLOGY					10.2981/wlb.00240	Ptarmigan are herbivorous birds that are year-round residents of alpine and arctic ecosystems. presently subjected to the most rapid climate warming on earth. Yet, compared to other bird taxa there has been little climate impact research on ptarmigan. Ptarmigan population dynamics, in particular in the sub/low-arctic, appears to be strongly influenced by complex interactions with a suite of funct…
231	exclude_title	exclude_abstract		EK	KH		exclude_abstract				WoS_Scopus											Hobbie, EA; Shamhart, J; Sheriff, M; Ouimette, AP; Trappe, M; Schuur, EAG; Hobbie, JE; Boonstra, R; Barnes, BM	2017	Stable isotopes and radiocarbon assess variable importance of plants and fungi in diets of arctic ground squirrels	ARCTIC ANTARCTIC AND ALPINE RESEARCH	49	3	487	500	10.1657/AAAR0016-062	Arctic ground squirrels (Urocitellus parryii) rely primarily on dietary protein derived from plants to fuel gluconeogenesis during hibernation, yet fungal sporocarps may be an important, yet overlooked, protein source. Fungivory levels depend on sporocarp productivity, which varies with the dominant plant species and is higher on acidic than on non-acidic soils. To test whether these factors alte…
232	exclude_title	exclude_abstract		EK	KH		exclude_abstract	not herbivory effects on plants		324	WoS_Scopus											Hogrefe, KR; Patil, VP; Ruthrauff, DR; Meixell, BW; Budde, ME; Hupp, JW; Ward, DH	2017	Normalized Difference Vegetation Index as an Estimator for Abundance and Quality of Avian Herbivore Forage in Arctic Alaska	REMOTE SENSING	9	12			10.3390/rs9121234	Tools that can monitor biomass and nutritional quality of forage plants are needed to understand how arctic herbivores may respond to the rapidly changing environment at high latitudes. The Normalized Difference Vegetation Index (NDVI) has been widely used to assess changes in abundance and distribution of terrestrial vegetative communities. However, the efficacy of NDVI to measure seasonal chang…
233	exclude_title	include		EK	KH		exclude_full_text			325	WoS_Scopus	yes	yes	include	exclude_full_text	human perspectives	no_outcome	OG	no			Horstkotte, T; Utsi, TA; Larsson-Blind, A; Burgess, P; Johansen, B; Kayhko, J; Oksanen, L; Forbes, BC	2017	Human-animal agency in reindeer management: Sami herders' perspectives on vegetation dynamics under climate change	ECOSPHERE	8	9			10.1002/ecs2.1931	Many primary livelihoods in Arctic and sub-Arctic regions experience accelerating effects of environmental change. The often close connection between indigenous peoples and their respective territories allows them to make detailed observations of how these changes transform the landscapes where they practice their daily activities. Here, we report Sami reindeer herders' observations based on thei…
234	include	co-author	include	EK	KH	IK	include				WoS_Scopus	yes	yes	include	include			MT	yes			Hoset, KS; Ruffino, L; Tuomi, M; Oksanen, T; Oksanen, L; Makynen, A; Johansen, B; Moe, T	2017	Changes in the Spatial Configuration and Strength of Trophic Control Across a Productivity Gradient During a Massive Rodent Outbreak	ECOSYSTEMS	20	8	1421	1435	10.1007/s10021-017-0124-1	Understanding the determinants of spatial and temporal differences in the relative strength of consumer-resource interactions is an important endeavour in ecology. Here, we explore the necessary conditions for temporal shifts in the relative strength of rodent-plant interactions in an area characterised by profound spatial differences in trophic control, with predator-prey interactions prevailing…
235	include	exclude_abstract		EK	KH		exclude_full_text				WoS_Scopus	yes	no	NA	exclude_full_text	It is a concept paper	no_outcome_data	JM	no			Howison, RA; Olff, H; van de Koppel, J; Smit, C	2017	Biotically driven vegetation mosaics in grazing ecosystems: the battle between bioturbation and biocompaction	ECOLOGICAL MONOGRAPHS	87	3	363	378	10.1002/ecm.1259	Grazing ecosystems ranging from the Arctic tundra to tropical savannas are often characterized by small-scale mosaics of herbivore-preferred and herbivore-avoided patches, promoting plant biodiversity and resilience. The three leading explanations for bistable patchiness in grazed ecosystems are (1) herbivore-driven nutrient cycling, (2) plant-growth-water-infiltration feedback under aridity, and…
236	exclude_abstract	include		EK	KH		exclude_full_text				WoS_Scopus	yes	no	NA	exclude_full_text	conceptual paper, not measuring effects of herbivores	no_outcome	JM	no			Humphries, MM; Studd, EK; Menzies, AK; Boutin, S	2017	To Everything There Is a Season: Summer-to-Winter Food Webs and the Functional Traits of Keystone Species	INTEGRATIVE AND COMPARATIVE BIOLOGY	57	5	961	976	10.1093/icb/icx119	From a trophic perspective, a seasonal increase in air temperature and photoperiod propagates as bottom-up pulse of primary production by plants, secondary production by herbivores, and tertiary production by carnivores. However, food web seasonality reflects not only abiotic variation in temperature and photoperiod, but also the composition of the biotic community and their functional responses …
237	exclude_title	exclude_title		EK	KH		exclude_title				WoS_Scopus											Hupp, JW; Ward, DH; Hogrefe, KR; Sedinger, JS; Martin, PD; Stickney, AA; Obritschkewitsch, T	2017	Growth of Black Brant and Lesser Snow Goose Goslings in Northern Alaska	JOURNAL OF WILDLIFE MANAGEMENT	81	5	846	857	10.1002/jwmg.21246	Gosling body mass can affect first year survival, recruitment, adult body size, and future fecundity of geese, and can serve as an indicator of forage availability and quality on brood-rearing areas. From 2012-2014 we measured body mass of 76 black brant (Branta bernicla nigricans) and 268 lesser snow goose (Chen caerulescens caerulescens) goslings of known age on the Colville River Delta (CRD) o…
238	exclude_title	exclude_title		EK	KH		remove_duplicate			327	WoS_Scopus											Iturrate-Garcia, M; Heijmans, MMPD; Schweingruber, FH; Maximov, TC; Niklaus, PA; Schaepman-Strub, G	2017	Shrub growth rate and bark responses to soil warming and nutrient addition - A dendroecological approach in a field experiment	DENDROCHRONOLOGIA	45		12	22	10.1016/j.dendro.2017.07.001	Tundra shrubs are slow-growing species limited by low air temperature and scarce nutrient availability. However, shrub expansion has been widely observed in the Arctic during the last decades and attributed to climate warming. Shift in shrub growth, wood structure and abundance affects the surface albedo and permafrost thawing and these changes may feedback to climate. Despite the importance of s…
239	co-author	include	include	EK	KH	IK	include	no abstract		240	WoS_Scopus	yes	yes	include	include			MT	yes			Kaarlejarvi, E; Eskelinen, A; Olofsson, J	2017	Herbivores rescue diversity in warming tundra by modulating trait-dependent species losses and gains (vol 8, 419, 2017)	NATURE COMMUNICATIONS	8				10.1038/s41467-017-02129-4
240	co-author	duplicate		EK	KH		remove_duplicate			239	WoS_Scopus											Kaarlejarvi, E; Eskelinen, A; Olofsson, J	2017	Herbivores rescue diversity in warming tundra by modulating trait-dependent species losses and gains	NATURE COMMUNICATIONS	8				10.1038/s41467-017-00554-z	Climate warming is altering the diversity of plant communities but it remains unknown which species will be lost or gained under warming, especially considering interactions with other factors such as herbivory and nutrient availability. Here, we experimentally test effects of warming, mammalian herbivory and fertilization on tundra species richness and investigate how plant functional traits aff…
241	exclude_title	exclude_title		EK	KH		remove_duplicate			330	WoS_Scopus											Kaltenborn, BP; Linnell, JDC; Thomassen, J; Lindhjem, H	2017	Complacency or resilience? Perceptions of environmental and social change in Lofoten and Vesteralen in northern Norway	OCEAN & COASTAL MANAGEMENT	138		29	37	10.1016/j.ocecoaman.2017.01.010	Arctic and northern coastal regions are among the least developed in the world in terms of density of settlements, population and resource exploitation. It is often assumed that these regions will be frontiers of future change, conflict and opportunity due to climate change, new transportation routes, geopolitical tensions and increasing demands for their natural resources. But to what degree do …
242	exclude_abstract	exclude_abstract		EK	KH		exclude_abstract	not herbivory effects on plants			WoS_Scopus											Karlsen, SR; Tommervik, H; Johansen, B; Riseth, JA	2017	Future forest distribution on Finnmarksvidda, North Norway	CLIMATE RESEARCH	73	2019-02-01	125	133	10.3354/cr01459	Finnmarksvidda is Norway's largest mountain plateau, located in the Arctic/alpineboreal transition area. The area is also a central winter grazing area for the reindeer herds of the indigenous Sami people. This study develops a bioclimatic-based model to simulate future potential vegetation, with a focus on forest types. The model utilizes a bioclimatic study in the region, where vegetation types…
243	exclude_title	exclude_abstract		EK	KH		exclude_abstract				WoS_Scopus											Katano, I; Mitsuhashi, H; Doi, H; Isobe, Y; Oishi, T	2017	Distribution and drift dispersal dynamics of a caddisfly grazer in response to resource abundance and its ontogeny	ROYAL SOCIETY OPEN SCIENCE	4	1			10.1098/rsos.160732	Stream grazers have a major impact on food web structure and the productivity of stream ecosystems; however, studies on the longitudinal (upstream versus downstream) and temporal changes in their drift dynamics and resulting distributions remain limited. Here, we investigated the longitudinal and temporal distributions and drift propensity of a trichopteran grazer, the caddisfly, Micrasema quadri…
244	include	include		EK	KH		exclude_full_text				WoS_Scopus	yes	yes	include	exclude_full_text	Authors studied boreal Scots pine forest. Although the study area is in the Arctic, it is located in the zone of the last intact forest landscapes in Fennoscandia, where large areas of undisturbed subarctic Scots pine (Pinus sylvestris L.) forests occur.	no_population	MT	no			Koster, K; Koster, E; Kulmala, L; Berninger, F; Pumpanen, J	2017	Are the climatic factors combined with reindeer grazing affecting the soil CO2 emissions in subarctic boreal pine forest?	CATENA	149		616	622	10.1016/j.catena.2016.06.011	In this work, we investigated how the reindeer grazing in subarctic boreal Scots pine forests and climate (air temperature and the amount of precipitation) affects soil temperature, soil water content, and ultimately the CO2 efflux from forest soils. The study was carried out in years 2013 and 2014, where 2013 was an extremely dry year (especially the summer), while 2014 was a "normal" year. Our …
245	include	exclude_abstract		EK	KH		exclude_full_text				WoS_Scopus	yes	yes	include	exclude_full_text	Study focused on mountain birch and Norway spruce forests; no mention of forest-tundra or ecotone habitats. Study area is about 135-190 km south of the treeline	no_population	MT	no			Kozlov, MV; Zverev, V; Zvereva, EL	2017	Combined effects of environmental disturbance and climate warming on insect herbivory in mountain birch in subarctic forests: Results of 26-year monitoring	SCIENCE OF THE TOTAL ENVIRONMENT	601		802	811	10.1016/j.scitotenv.2017.05.230	Both pollution and climate affect insect-plant interactions, but the combined effects of these two abiotic drivers of global change on insect herbivory remain almost unexplored. From 1991 to 2016, we monitored the population densities of 25 species or species groups of insects feeding on mountain birch (Betula pubescens ssp. czerepanovii) in 29 sites and recorded leaf damage by insects in 21 site…
246	exclude_title	exclude_title		EK	KH		exclude_title				WoS_Scopus											Krajewska, M; Szymczak-Zyla, M; Kowalewska, G	2017	Algal pigments in Hornsund (Svalbard) sediments as biomarkers of Arctic productivity and environmental conditions	POLISH POLAR RESEARCH	38	4	423	443	10.1515/popore-2017-0025	Pigments (chloropigments-a and carotenoids) in sediments and macroalgae samples, collected in Hornsund, in July 2015 and July 2016, were analysed (HPLC) in this work. In spite of the aerobic conditions and the periodic intensive solar irradiation in the Arctic environment, neither of which favour pigment preservation in water column and surface sediments, our results indicate that these compounds…
247	exclude_title	exclude_title		EK	KH		exclude_title			331	WoS_Scopus											Kryukov, VY; Tyurin, MV; Tomilova, OG; Yaroslavtseva, ON; Kryukova, NA; Duisembekov, BA; Tokarev, YS; Glupov, VV	2017	Immunosuppression of Insects by the Venom of Habrobracon hebetor Increases the Sensitivity of Bait Method for the Isolation of Entomopathogenic Fungi from Soils	BIOLOGY BULLETIN	44	4	401	405	10.1134/S1062359017030050	We evaluated the susceptibility of Galleria mellonella larvae immunosuppressed by the venom of Habrobracon hebetor to soil entomopathogenic ascomycetes with the use of bait method. It was found that the sensitivity of the modified method was significantly (by almost 200 times) increased as compared with the standard procedure, which provided the isolation of fungi when their abundance was extreme…
248	exclude_title	exclude_title		EK	KH		exclude_title				WoS_Scopus											Laiho, R; Penttila, T; Fritze, H	2017	Reindeer droppings may increase methane production potential in subarctic wetlands	SOIL BIOLOGY & BIOCHEMISTRY	113		260	262	10.1016/j.soilbio.2017.06.017	Reindeer (Rangifer tarandus) herding is a major land-use form in northern Eurasian peatlands, especially subarctic fens. Nevertheless, the impacts of reindeer grazing on the functioning of peatland ecosystems remain virtually unexplored. Here we show with a laboratory incubation study that reindeer droppings may stimulate methane production in peat soils, a phenomenon that should be quantified at…
249	exclude_abstract	exclude_abstract		EK	KH		exclude_abstract				WoS_Scopus											Lameris, TK; Jochems, F; van der Graaf, AJ; Andersson, M; Limpens, J; Nolet, BA	2017	Forage plants of an Arctic-nesting herbivore show larger warming response in breeding than wintering grounds, potentially disrupting migration phenology	ECOLOGY AND EVOLUTION	7	8	2652	2660	10.1002/ece3.2859	During spring migration, herbivorous waterfowl breeding in the Arctic depend on peaks in the supply of nitrogen-rich forage plants, following a green wave of grass growth along their flyway to fuel migration and reproduction. The effects of climate warming on forage plant growth are expected to be larger at the Arctic breeding grounds than in temperate wintering grounds, potentially disrupting th…
250	exclude_title	exclude_abstract		EK	KH		exclude_abstract				WoS_Scopus											Langlois, A; Johnson, CA; Montpetit, B; Royer, A; Blukacz-Richards, EA; Neave, E; Dolant, C; Roy, A; Arhonditsis, G; Kim, DK; Kaluskar, S; Brucker, L	2017	Detection of rain-on-snow (ROS) events and ice layer formation using passive microwave radiometry: A context for Peary caribou habitat in the Canadian Arctic	REMOTE SENSING OF ENVIRONMENT	189		84	95	10.1016/j.rse.2016.11.006	Over the past four decades, amplified warming in the Arctic has led to numerous consequences. Of particular relevance, negative anomalies of snow and sea ice cover, glacier retreat, and the extended melt of Greenland combined with increasing temperature at double the rate of the rest of the planet have been observed in the Arctic. Several studies have suggested that another response to the curren…
251	exclude_title	exclude_title		EK	KH		exclude_title				WoS_Scopus											Lanoe, FB; Reuther, JD; Holmes, CE; Hodgins, GWL	2017	Human paleoecological integration in subarctic eastern Beringia	QUATERNARY SCIENCE REVIEWS	175		85	96	10.1016/j.quascirev.2017.10.003	We contribute to the understanding of megafauna extinction and human dispersal in subarctic eastern Beringia by focusing on changes in the trophic dynamics of the large mammal community as well as the ecological role of humans as a predator and competitor. We reconstruct habitat use by megafauna and humans throughout the Pleistocene-Holocene boundary based on zooarchaeological data and stable iso…
252	include	include		EK	KH		include			332	WoS_Scopus	yes	yes	include	include			MT	yes			Lara, MJ; Johnson, DR; Andresen, C; Hollister, RD; Tweedie, CE	2017	Peak season carbon exchange shifts from a sink to a source following 50+years of herbivore exclusion in an Arctic tundra ecosystem	JOURNAL OF ECOLOGY	105	1	122	131	10.1111/1365-2745.12654	1. To date, the majority of our knowledge regarding the impacts of herbivory on arctic ecosystem function has been restricted to short-term (<5 years) exclusion or manipulation experiments. Our understanding of long-term responses of sustained herbivory and/or herbivore exclusion on arctic tundra ecosystem function is severely limited. 2. Recent evidence suggests lemming population outbreaks, whi…
253	exclude_title	exclude_abstract		EK	KH		exclude_abstract				WoS_Scopus											Le Moullec, M; Pedersen, AO; Yoccoz, NG; Aanes, R; Tufto, J; Hansen, BB	2017	Ungulate population monitoring in an open tundra landscape: distance sampling versus total counts	WILDLIFE BIOLOGY					10.2981/wlb.00299	Researchers and wildlife managers strive for low bias and high precision (i.e. high accuracy) when estimating animal population sizes. Distance sampling is currently one of the most widely used monitoring methods. However, it relies on strict sampling designs and modeling assumptions that can be difficult to meet in the field. Here, we use data from two sub-populations of non-migratory wild Svalb…
254	exclude_title	exclude_title		EK	KH		exclude_title				WoS_Scopus											Li, WW; Wang, SZ	2017	PolarGlobe: A web-wide virtual globe system for visualizing multidimensional, time-varying, big climate data	INTERNATIONAL JOURNAL OF GEOGRAPHICAL INFORMATION SCIENCE	31	8	1562	1582	10.1080/13658816.2017.1306863	The increasing research interest in global climate change and the rise of the public awareness have generated a significant demand for new tools to support effective visualization of big climate data in a cyber environment such that anyone from any location with an Internet connection and a web browser can easily view and comprehend the data. In response to the demand, this paper introduces a new…
255	include	include		EK	KH		include			3323	WoS_Scopus	yes	yes	include	include			MT	yes			Little, CJ; Cutting, H; Alatalo, J; Cooper, EJ	2017	Short-term herbivory has long-term consequences in warmed and ambient high Arctic tundra	ENVIRONMENTAL RESEARCH LETTERS	12	2			10.1088/1748-9326/aa579d	Climate change is occurring across the world, with effects varying by ecosystem and region but already occurring quickly in high-latitude and high-altitude regions. Biotic interactions are important in determining ecosystem response to such changes, but few studies have been long-term in nature, especially in the High Arctic. Mesic tundra plots on Svalbard, Norway, were subjected to grazing at tw…
256	exclude_title	exclude_title		EK	KH		exclude_title				WoS_Scopus											Liu, SX; Li, ZL	2017	Reflecting and scattering of acoustic wave from sea ices	ACTA PHYSICA SINICA	66	23			10.7498/aps.66.234301	In order to build an efficient underwater acoustic sensor network in the Arctic Ocean environment, transmission characteristics of under-ice acoustic channels need comprehensive understanding. The reflecting and scattering of acoustic waves from sea ices have great influences on under-ice acoustic channels. Both topology and structure of sea surface ices are very complex and variable. The physica…
257	exclude_title	exclude_abstract		EK	KH		exclude_abstract			333	WoS_Scopus											Loginov, VG; Ignatyeva, MN; Balashenko, VV	2017	Harm to the Resources of Traditional Nature Management and Its Economic Evaluation	EKONOMIKA REGIONA-ECONOMY OF REGION	13	2	396	409	10.17059/2017-2-6	The Yamal region occupies the fifth part of the Yamal-Nenets Autonomous District. Therefore it is one of the territories where traditional natural resource management is mainly developing. Its key branches are reindeer herding and fisheries. The major problems in the development of industries are due to an active industrial and transport exploitation of the tundra zone; the situation in reindeer …
258	include	include		EK	KH		include	coordinates were wrong in the Coordinates_scoring text (missing minus sign for W coord), so this study was excluded based on coordinates, but I think it should be included -- it is from Nuuk			WoS_Scopus	yes	yes	include	include			ICB	yes			Lund, M; Raundrup, K; Westergaard-Nielsen, A; Lopez-Blanco, E; Nymand, J; Aastrup, P	2017	Larval outbreaks in West Greenland: Instant and subsequent effects on tundra ecosystem productivity and CO2 exchange	AMBIO	46		S26	S38	10.1007/s13280-016-0863-9	Insect outbreaks can have important consequences for tundra ecosystems. In this study, we synthesise available information on outbreaks of larvae of the noctuid moth Eurois occulta in Greenland. Based on an extensive dataset from a monitoring programme in Kobbefjord, West Greenland, we demonstrate effects of a larval outbreak in 2011 on vegetation productivity and CO2 exchange. We estimate a decr…
259	exclude_title	exclude_title		EK	KH		exclude_title				WoS_Scopus											MacMillan, GA; Chetelat, J; Heath, JP; Mickpegak, R; Amyot, M	2017	Rare earth elements in freshwater, marine, and terrestrial ecosystems in the eastern Canadian Arctic	ENVIRONMENTAL SCIENCE-PROCESSES & IMPACTS	19	10	1336	1345	10.1039/c7em00082k	Few ecotoxicological studies exist for rare earth elements (REEs), particularly field-based studies on their bioaccumulation and food web dynamics. REE mining has led to significant environmental impacts in several countries (China, Brazil, U.S.), yet little is known about the fate and transport of these contaminants of emerging concern. Northern ecosystems are potentially vulnerable to REE enric…
260	exclude_title	exclude_title		EK	KH		exclude_title				WoS_Scopus											Majaneva, M; Blomster, J; Muller, S; Autio, R; Majaneva, S; Hyytiainen, K; Nagai, S; Rintala, JM	2017	Sea-ice eukaryotes of the Gulf of Finland, Baltic Sea, and evidence for herbivory on weakly shade-adapted ice algae	EUROPEAN JOURNAL OF PROTISTOLOGY	57		1	15	10.1016/j.ejop.2016.10.005	To determine community composition and physiological status of early spring sea-ice organisms, we collected sea-ice, slush and under-ice water samples from the Baltic Sea. We combined light microscopy, HPLC pigment analysis and pyrosequencing, and related the biomass and physiological status of sea-ice algae with the protistan community composition in a new way in the area. In terms of biomass, c…
261	include	exclude_abstract		EK	KH		exclude_full_text	Iceland -- but exclude_full_text because it is a review (not presenting original data)			WoS_Scopus	yes	yes	exclude_site_coordinates	exclude_full_text	review (not presenting original data)	no_outcome_data	ICB	no			Marteinsdottir, B; Barrio, IC; Jonsdottir, IS	2017	Assessing the Ecological Impacts of Extensive Sheep Grazing in Iceland	ICELANDIC AGRICULTURAL SCIENCES	30		55	72	10.16886/IAS.2017.07	The sustainability of sheep grazing in Iceland has been repeatedly questioned as in some areas high stocking rates have been associated with extensive soil erosion and ecosystem degradation. We synthesized all available information on the effects of sheep grazing on vegetation, soil properties and other organisms in the rangelands of Iceland, with special focus on the grey literature. We compiled…
262	include	include		EK	KH		exclude_full_text			334	WoS_Scopus	yes	no		exclude_full_text	review paper, no primary data	no_outcome_data	EMS	no			Martin, AC; Jeffers, ES; Petrokofsky, G; Myers-Smith, I; Macias-Fauria, M	2017	Shrub growth and expansion in the Arctic tundra: an assessment of controlling factors using an evidence-based approach	ENVIRONMENTAL RESEARCH LETTERS	12	8			10.1088/1748-9326/aa7989	Woody shrubs have increased in biomass and expanded into new areas throughout the PanArctic tundra biome in recent decades, which has been linked to a biome-wide observed increase in productivity. Experimental, observational, and socio-ecological research suggests that air temperature-and to a lesser degree precipitation-trends have been the predominant drivers of this change. However, a progress…
263	exclude_title	exclude_title		EK	KH		exclude_title				WoS_Scopus											Meiners, KM; Arndt, S; Bestley, S; Krumpen, T; Ricker, R; Milnes, M; Newbery, K; Freier, U; Jarman, S; King, R; Proud, R; Kawaguchi, S; Meyer, B	2017	Antarctic pack ice algal distribution: Floe-scale spatial variability and predictability from physical parameters	GEOPHYSICAL RESEARCH LETTERS	44	14	7382	7390	10.1002/2017GL074346	Antarctic pack ice serves as habitat for microalgae which contribute to Southern Ocean primary production and serve as important food source for pelagic herbivores. Ice algal biomass is highly patchy and remains severely undersampled by classical methods such as spatially restricted ice coring surveys. Here we provide an unprecedented view of ice algal biomass distribution, mapped (as chlorophyll…
264	exclude_title	exclude_title		EK	KH		exclude_title				WoS_Scopus											Michelsen, HK; Nilssen, EM; Pedersen, T; Reigstad, M; Svensen, C	2017	Spatial patterns of spring meroplankton along environmental gradients in a sub-Arctic fjord	AQUATIC BIOLOGY	26		185	197	10.3354/ab00686	The spatial patterns in abundance and composition of benthic invertebrate larvae (meroplankton), the correlation between these patterns and environmental variables (temperature, salinity and chl a) and the relative abundance of meroplankton in the mesozooplankton community were investigated in the sub-Arctic Porsangerfjord, Norway (70 degrees N). Zooplankton samples and CTD-profiles were collecte…
265	exclude_title	exclude_title		EK	KH		exclude_title				WoS_Scopus											Michelsen, HK; Svensen, C; Reigstad, M; Nilssen, EM; Pedersen, T	2017	Seasonal dynamics of meroplankton in a high-latitude fjord	JOURNAL OF MARINE SYSTEMS	168		17	30	10.1016/j.jmarsys.2016.12.001	Knowledge on the seasonal timing and composition of pelagic larvae of many benthic invertebrates, referred to as meroplankton, is limited for high-latitude fjords and coastal areas. We investigated the seasonal dynamics of meroplankton in the sub-Arctic Porsangerfjord (70 degrees N), Norway, by examining their seasonal changes in relation to temperature, chlorophyll a and salinity. Samples were c…
266	exclude_title	exclude_title		EK	KH		exclude_title				WoS_Scopus											Nakajima, R; Yamazaki, H; Lewis, LS; Khen, A; Smith, JE; Nakatomi, N; Kurihara, H	2017	Planktonic trophic structure in a coral reef ecosystem - Grazing versus microbial food webs and the production of mesozooplankton	PROGRESS IN OCEANOGRAPHY	156		104	120	10.1016/j.pocean.2017.06.007	The relative contributions of grazing versus microbial food webs to the production of mesozooplankton communities in coral reef ecosystems remains an important and understudied field of inquiry. Here, we investigated the biomass and production of component organisms within these two food webs, and compared them to those of mesozooplankton on a coral reef in Okinawa, Japan throughout four seasons …
267	exclude_title	exclude_abstract		EK	KH		exclude_abstract				WoS_Scopus											Normand, S; Hoye, TT; Forbes, BC; Bowden, JJ; Davies, AL; Odgaard, BV; Riede, F; Svenning, JC; Treier, UA; Willerslev, R; Wischnewski, J	2017	Legacies of Historical Human Activities in Arctic Woody Plant Dynamics	ANNUAL REVIEW OF ENVIRONMENT AND RESOURCES, VOL 42	42		541	567	10.1146/annurev-environ-110615-085454	Recent changes in arctic vegetation might not be driven by climate change alone. Legacies of human activities have received little attention as a contributing factor. We examine the extent to which traditional human activities (hunting, herding, fire, wood extraction, and agriculture) have had lasting effects on arctic woody plant communities and therefore might continue to affect biome-wide resp…
268	include	include		EK	KH		exclude_full_text				WoS_Scopus	yes	yes	include	exclude_full_text	Study focused on mountain birch forests in the subarctic zone in northern Sweden with Lake Torneträsk; no mention of forest-tundra or ecotone habitats.	no_population	MT	no			Olsson, PO; Heliasz, M; Jin, HX; Eklundh, L	2017	Mapping the reduction in gross primary productivity in subarctic birch forests due to insect outbreaks	BIOGEOSCIENCES	14	6	1703	1719	10.5194/bg-14-1703-2017	It is projected that forest disturbances, such as insect outbreaks, will have an increasingly negative impact on forests with a warmer climate. These disturbance events can have a substantial impact on forests' ability to absorb atmospheric CO2, and may even turn forests from carbon sinks into carbon sources; hence, it is important to develop methods both to monitor forest disturbances and to qua…
269	exclude_abstract	exclude_abstract		EK	KH		exclude_abstract				WoS_Scopus											Onatibia, GR; Reyes, MF; Aguiar, MR	2017	Fine-scale root community structure and below-ground responses to grazing show independence from above-ground patterns	JOURNAL OF VEGETATION SCIENCE	28	6	1097	1106	10.1111/jvs.12571	Question: Root biomass distribution and below-ground processes are the main drivers of plant community structure and dynamics in arid rangelands. However, despite their relevance, below-ground plant responses to disturbance regimes remain poorly understood. This knowledge is a pressing issue since most of our ideas derive from extrapolating above-ground ecological theory and data. Here, we asked …
270	exclude_title	exclude_abstract		EK	KH		exclude_abstract				WoS_Scopus											Ouellet, F; Langlois, A; Blukacz-Richards, EA; Johnson, CA; Royer, A; Neave, E; Larter, NC	2017	Spatialization of the SNOWPACK snow model for the Canadian Arctic to assess Peary caribou winter grazing conditions	PHYSICAL GEOGRAPHY	38	2	143	158	10.1080/02723646.2016.1274200	Peary caribou is the northernmost designatable unit for caribou species, and its population has declined by about 70% over the last three generations. The Committee on the Status of Endangered Wildlife in Canada identified difficult grazing conditions through the snow cover as being the most significant factor contributing to this decline. This study focuses on a spatially explicit assessment too…
271	exclude_title	exclude_title		EK	KH		exclude_title				WoS_Scopus											Park, JS	2017	A race against time: habitat alteration by snow geese prunes the seasonal sequence of mosquito emergence in a subarctic brackish landscape	POLAR BIOLOGY	40	3	553	561	10.1007/s00300-016-1978-y	Species compositions in highly seasonal habitats often exhibit predictable patterns through time. However, the roles that ecological interactions play in shaping the sequence of species phenologies through a season are largely unexplored. Across the tundra on the Hudson Bay Lowlands, extensive foraging by lesser snow goose populations has been driving alterations to the landscape. Here, I show th…
272	include	exclude_title		EK	KH		exclude_full_text				WoS_Scopus	yes	yes	include	exclude_full_text	Study focused on treeline birch forest near Abisko, Sweden; no mention of forest-tundra or ecotone habitats	no_population	MT	no			Parker, TC; Sadowsky, J; Dunleavy, H; Subke, JA; Frey, SD; Wookey, PA	2017	Slowed Biogeochemical Cycling in Sub-arctic Birch Forest Linked to Reduced Mycorrhizal Growth and Community Change after a Defoliation Event	ECOSYSTEMS	20	2	316	330	10.1007/s10021-016-0026-7	Sub-arctic birch forests (Betula pubescens Ehrh. ssp. czerepanovii) periodically suffer large-scale defoliation events caused by the caterpillars of the geometrid moths Epirrita autumnata and Operophtera brumata. Despite their obvious influence on ecosystem primary productivity, little is known about how the associated reduction in belowground C allocation affects soil processes. We quantified th…
273	exclude_title	exclude_title		EK	KH		exclude_title				WoS_Scopus											Pasternak, AF; Drits, AV; Flint, MV	2017	Feeding, Egg Production, and Respiration Rate of Pteropods Limacina in Arctic Seas	OCEANOLOGY	57	1	122	129	10.1134/S000143701701012X	The feeding, egg production, and respiration rate of the dominant pteropod Limacina helicina have been studied in Russia's Arctic seas. The sinking rates of fecal pellets and dead individuals have been measured to estimate their role in vertical carbon flux. As has been shown, the rate of ecophysiological processes taking place in the pteropods is higher than that of copepods, the main consumers …
274	exclude_title	exclude_title		EK	KH		exclude_title				WoS_Scopus											Paulsen, ML; Riisgaard, K; St John, M; Thingstad, TF; Nielsen, TG	2017	Heterotrophic nanoflagellate grazing facilitates subarctic Atlantic spring bloom development	AQUATIC MICROBIAL ECOLOGY	78	3	161	176	10.3354/ame01807	The subarctic Atlantic phytoplankton spring bloom is one of the largest biological features of the ocean; however, processes initiating the bloom are still not well understood. We hypothesize that the microbial grazing food chain plays an important role in creating a pre-bloom condition with top-down control of small-sized phytoplankton, thus paving the way for a diatom-dominated spring bloom. To…
275	exclude_title	exclude_title		EK	KH		exclude_title				WoS_Scopus											Peeters, B; Veiberg, V; Pedersen, AO; Stien, A; Irvine, RJ; Aanes, R; S'Ther, BE; Strand, O; Hansen, BB	2017	Climate and density dependence cause changes in adult sex ratio in a large Arctic herbivore	ECOSPHERE	8	2			10.1002/ecs2.1699	Variation in adult sex ratio (ASR) affects population demography and dynamics of large mammals. The mechanisms behind this variation are largely unclear, but may be partly related to climatic drivers and density dependence operating differently on the adult male and female segments of the population. Here, we examine such drivers of annual changes in ASR in the predator-free wild Svalbard reindee…
276	exclude_title	exclude_title		EK	KH		exclude_title				WoS_Scopus											Puig, S; Rosi, MI; Videla, F; Mendez, E	2017	Flexibility in the food selection by the European hare (Lepus europaeus) along the altitudinal gradient of the Southern Andean Precordillera (Argentina)	MAMMAL RESEARCH	62	1	75	87	10.1007/s13364-016-0288-7	Predictions derived from the optimal foraging theory are interesting to test on wild herbivores living in mountain environments, considering the expected vegetation changes across altitudinal gradients. A lower food richness and a more generalist diet are expected as altitude increases, with higher diet diversity and a shift to browsing as food availability decreases seasonally. With broad diets …
277	exclude_title	exclude_title		EK	KH		exclude_title			337	WoS_Scopus											Rey, F; Gobet, E; van Leeuwen, JFN; Gilli, A; van Raden, UJ; Hafner, A; Wey, O; Rhiner, J; Schmocker, D; Zund, J; Tinner, W	2017	Vegetational and agricultural dynamics at Burgaschisee (Swiss Plateau) recorded for 18,700 years by multi-proxy evidence from partly varved sediments	VEGETATION HISTORY AND ARCHAEOBOTANY	26	6	571	586	10.1007/s00334-017-0635-x	Little is known about the timing and the vegetation dynamics shortly after the Last Glacial Maximum (LGM) on the Swiss Plateau 19,000-15,000 cal bp. Subsequent Late Glacial and Holocene vegetation changes are better known; however, it is unclear if the few available palynological and macrofossil records are able to capture the entire vegetation variability of the region. A new palaeoecological mu…
278	exclude_abstract	exclude_abstract		EK	KH		exclude_abstract				WoS_Scopus											Rinas, CL; Dial, RJ; Sullivan, PF; Smeltz, TS; Tobin, SC; Loso, M; Geck, JE	2017	Thermal segregation drives patterns of alder and willow expansion in a montane ecosystem subject to climate warming	JOURNAL OF ECOLOGY	105	4	935	946	10.1111/1365-2745.12737	1. Tall-shrub expansion into low-statured communities, a hallmark of recent vegetative change across tundra ecosystems, involves three major genera: Alnus, Betula and Salix. Which genus expands most into tundra landscapes will determine ecosystem properties. 2. We show that Alnus and Salix shrubs segregate thermal space (elevation 9 insolation) and colonize tundra landscapes differently in respon…
279	exclude_title	exclude_abstract		EK	KH		exclude_abstract				WoS_Scopus											Ross, MV; Alisauskas, RT; Douglas, DC; Kelletti, DK	2017	Decadal declines in avian herbivore reproduction: density-dependent nutrition and phenological mismatch in the Arctic	ECOLOGY	98	7	1869	1883	10.1002/ecy.1856	A full understanding of population dynamics depends not only on estimation of mechanistic contributions of recruitment and survival, but also knowledge about the ecological processes that drive each of these vital rates. The process of recruitment in particular may be protracted over several years, and can depend on numerous ecological complexities until sexually mature adulthood is attained. We …
280	include	exclude_abstract		EK	KH		exclude_full_text			281	WoS_Scopus	yes	yes	include	exclude_full_text	habitat use study, no response of plants on herbivory	no_outcome	MT, EMS	yes			Rozenfeld, SB; Sheremetev, IS; Baranyuk, VV	2017	THE LESSER SNOW GOOSE ON WRANGEL ISLAND: TROPHIC RELATIONS AND THE CHOICE OF REPRODUCTIVE HABITATS	ZOOLOGICHESKY ZHURNAL	96	5	511	521	10.7868/S0044513417030102	The Lesser Snow Goose (Anser caerulescens caerulescens) is one of the most abundant geese globally. Its nesting distribution area which mostly lies in North America is presently expanding, with the numbers over the last 50 years grown from 1 to 15 million. Yet this goose species which has been exterminated in Eurasia fails to recover its historical range. The only large breeding colony in Eurasia…
281	include	duplicate		EK	KH		remove_duplicate			280	WoS_Scopus											Rozenfeld, SB; Sheremetyev, IS; Baranyuk, VV	2017	The Lesser Snow Goose on Wrangel Island: Trophic Interactions with Ruminants and Breeding Habitat Selection	BIOLOGY BULLETIN	44	9	1035	1045	10.1134/S1062359017090102	The lesser snow goose (Anser caerulescens caerulescens) has been exterminated across a vast area of Eurasia. At present, it is unable to regenerate there, though its population in North America has reached fifteen million. In Eurasia, the only major nesting colony still persists on Wrangel Island, where the geese use the trophic resources together with ruminants. An assessment of the competitive …
282	exclude_title	exclude_title		EK	KH		exclude_title				WoS_Scopus											Sanchez, ME; Chimner, RA; Hribljan, JA; Lilleskov, EA; Suarez, E	2017	Carbon dioxide and methane fluxes in grazed and undisturbed mountain peatlands in the Ecuadorian Andes	MIRES AND PEAT	19				10.19189/MaP.2017.OMB.277	Peatlands are widespread throughout the tropical Andean paramo. Despite the large carbon stocks in these ecosystems, carbon dioxide (CO2) and methane (CH4) flux data are lacking. In addition, cattle grazing is widespread in the paramo and could alter gas fluxes. Therefore, our objectives were to measure CO2 and CH4 fluxes with the static chamber technique in an undisturbed and in an intensively c…
283	exclude_abstract	exclude_title		EK	KH		exclude_abstract				WoS_Scopus											Sardans, J; Grau, O; Chen, HYH; Janssens, IA; Ciais, P; Piao, SL; Penuelas, J	2017	Changes in nutrient concentrations of leaves and roots in response to global change factors	GLOBAL CHANGE BIOLOGY	23	9	3849	3856	10.1111/gcb.13721	Global change impacts on biogeochemical cycles have been widely studied, but our understanding of whether the responses of plant elemental composition to global change drivers differ between above-and belowground plant organs remains incomplete. We conducted a meta-analysis of 201 reports including 1,687 observations of studies that have analyzed simultaneously N and P concentrations changes in l…
284	exclude_title	exclude_title		EK	KH		exclude_title				WoS_Scopus											Sato, M; Shiozaki, T; Hashihama, F	2017	Distribution of mixotrophic nanoflagellates along the latitudinal transect of the central North Pacific	JOURNAL OF OCEANOGRAPHY	73	2	159	168	10.1007/s10872-016-0393-x	To elucidate the ecological importance of mixotrophic nanoflagellates in the open ocean and the environmental factors that regulate their abundance, we surveyed latitudinal distributions of autotrophic, mixotrophic and heterotrophic nanoflagellates in the central North Pacific Ocean along a transect at 170A degrees W. Mixotrophic nanoflagellates significantly contributed (26-64 %) to total bacter…
285	exclude_title	exclude_title		EK	KH		exclude_title				WoS_Scopus											Schibalski, A; Lehtonen, A; Hickler, T; Schroder, B	2017	Identifying important topics for model refinement in a widely used process-based model informed by correlative model analyses in a boreal forest	SILVA FENNICA	51	4			10.14214/sf.6977	Models attempting to predict treeline shifts in changing climates must include the relevant ecological processes in sufficient detail. A previous correlative model study has pointed to nutrients, competition, and temperature as the most important factors shaping the treelines of Pinus sylvestris L., Picea abies (L.) H. Karst. and Betula pubescens Ehrh. in Finnish Lapland. Here, we applied a widel…
286	exclude_abstract	exclude_abstract		EK	KH		exclude_abstract				WoS_Scopus											Schmidt, NM; Hardwick, B; Gilg, O; Hoye, TT; Krogh, PH; Meltofte, H; Michelsen, A; Mosbacher, JB; Raundrup, K; Reneerkens, J; Stewart, L; Wirta, H; Roslin, T	2017	Interaction webs in arctic ecosystems: Determinants of arctic change?	AMBIO	46		S12	S25	10.1007/s13280-016-0862-x	How species interact modulate their dynamics, their response to environmental change, and ultimately the functioning and stability of entire communities. Work conducted at Zackenberg, Northeast Greenland, has changed our view on how networks of arctic biotic interactions are structured, how they vary in time, and how they are changing with current environmental change: firstly, the high arctic in…
287	include	exclude_abstract		EK	KH		exclude_full_text				WoS_Scopus	yes	yes	exclude	exclude_full_text	no plant response to herbivory studied, study on trophic overlap	no_outcome	MT, EMS	yes			Sheremetyev, IS; Rozenfeld, SB; Gruzdev, AP	2017	Dietary overlap among ruminants, geese, and lemmings of Wrangel Island in summer	RUSSIAN JOURNAL OF ECOLOGY	48	6	532	538	10.1134/S1067413617060091	Trends in the dynamics of herbivore community related to trophic competition in summer have been analyzed on Wrangel Island. The results show that the trophic spectra overlap considerably, resources are partitioned on the principle "weak competitors after strong competitors," and community dynamics in the absence of extermination depend on specific competitive advantages related to the width of f…
288	include	exclude_abstract		EK	KH		include	effects on soil			WoS_Scopus	yes	yes	include	include			AK, ICB	yes			Sitters, J; te Beest, M; Cherif, M; Giesler, R; Olofsson, J	2017	Interactive Effects Between Reindeer and Habitat Fertility Drive Soil Nutrient Availabilities in Arctic Tundra	ECOSYSTEMS	20	7	1266	1277	10.1007/s10021-017-0108-1	Herbivores impact nutrient availability and cycling, and the net effect of herbivory on soil nutrients is generally assumed to be positive in nutrient-rich environments and negative in nutrient-poor ones. This is, however, far from a uniform pattern, and there is a recognized need to investigate any interactive effects of herbivory and habitat fertility (i.e., plant C/N ratios) on soil nutrient a…
289	exclude_title	exclude_title		EK	KH		exclude_title				WoS_Scopus											Sorensen, HL; Thamdrup, B; Jeppesen, E; Rysgaard, S; Glud, RN	2017	Nutrient availability limits biological production in Arctic sea ice melt ponds	POLAR BIOLOGY	40	8	1593	1606	10.1007/s00300-017-2082-7	Every spring and summer melt ponds form at the surface of polar sea ice and become habitats where biological production may take place. Previous studies report a large variability in the productivity, but the causes are unknown. We investigated if nutrients limit the productivity in these first-year ice melt ponds by adding nutrients to three enclosures ([1] PO43-, [2] NO3-, and [3] PO43- and NO3…
290	include	include		EK	KH		include				WoS_Scopus	yes	yes	include	include			OG	yes			Speed, JDM; Austrheim, G	2017	The importance of herbivore density and management as determinants of the distribution of rare plant species	BIOLOGICAL CONSERVATION	205		77	84	10.1016/j.biocon.2016.11.030	Herbivores are often drivers of ecosystem states and dynamics and in many situations are managed either as livestock or through controlled or exploitative hunting of wild populations. Changes in herbivore density can affect the composition of plant communities. Management of herbivore densities could therefore be regulated to benefit plant species of conservation concern. In this study we use a u…
291	exclude_title	exclude_title		EK	KH		exclude_title				WoS_Scopus											Steinberg, DK; Landry, MR	2017	Zooplankton and the Ocean Carbon Cycle	ANNUAL REVIEW OF MARINE SCIENCE, VOL 9	9		413	444	10.1146/annurev-marine-010814-015924	Marine zooplankton comprise a phylogenetically and functionally diverse assemblage of protistan and metazoan consumers that occupy multiple trophic levels in pelagic food webs. Within this complex network, carbon flows via alternative zooplankton pathways drive temporal and spatial variability in production-grazing coupling, nutrient cycling, export, and transfer efficiency to higher trophic leve…
292	include	exclude_title		EK	KH		exclude_full_text				WoS_Scopus	yes	yes	include	exclude_full_text	natural history note on polar bears eating plants, but not really on impacts of herbivory	no_outcome	MV, OG	no			Stempniewicz, L	2017	Polar bears observed climbing steep slopes to graze on scurvy grass in Svalbard	POLAR RESEARCH	36				10.1080/17518369.2017.1326453	It is well known that polar bears feed on vegetation. Here, I report novel observations of polar bears grazing on polar scurvy grass (Cochlearia groenlandica) at the foot of a large seabird colony on a cliff on Spitsbergen, Svalbard, in the summers of 2005, 2006, 2009, 2014 and 2015. Why they choose such energy-costly climbing to feed on plants is not clear. One possibility is that they may be su…
293	exclude_title	exclude_title		EK	KH		exclude_title				WoS_Scopus											Tahmasebi, F; Longstaffe, FJ; Zazula, G; Bennett, B	2017	Nitrogen and carbon isotopic dynamics of subarctic soils and plants in southern Yukon Territory and its implications for paleoecological and paleodietary studies	PLOS ONE	12	8			10.1371/journal.pone.0183016	We examine here the carbon and nitrogen isotopic compositions of bulk soils( 8 topsoil and 7 subsoils, including two soil profiles) and five different plant parts of 79 C-3 plants from two main functional groups: herbs and shrubs/subshrubs, from 18 different locations in grass-lands of southern Yukon Territory, Canada( eastern shoreline of Kluane Lake and White-horse area). The Kluane Lake region…
294	exclude_abstract	exclude_abstract		EK	KH		exclude_abstract				WoS_Scopus											Thompson, DP; Barboza, PS	2017	Seasonal energy and protein requirements for Siberian reindeer (Rangifer tarandus)	JOURNAL OF MAMMALOGY	98	6	1558	1567	10.1093/jmammal/gyx132	During summer and early autumn, reindeer and caribou (Rangifer tarandus) must exceed daily maintenance requirements for protein and energy to replenish body reserves for winter survival and reproduction. We estimated the maintenance requirements and the incremental costs of mass gain of captive female Siberian reindeer (R. t. tarandus) during summer and autumn by a mass balance approach. Intake (…
295	include	include		EK	KH		exclude_site_text				WoS_Scopus	yes	no	exclude_site_text				JM	no			Vandegehuchte, ML; van der Putten, WH; Duyts, H; Schutz, M; Risch, AC	2017	Aboveground mammal and invertebrate exclusions cause consistent changes in soil food webs of two subalpine grassland types, but mechanisms are system-specific	OIKOS	126	2	212	223	10.1111/oik.03341	Ungulates, smaller mammals, and invertebrates can each affect soil biota through their influence on vegetation and soil characteristics. However, direct and indirect effects of the aboveground biota on soil food webs remain to be unraveled. We assessed effects of progressively excluding aboveground large-, medium- and small-sized mammals as well as invertebrates on soil nematode diversity and fee…
296	exclude_title	exclude_abstract		EK	KH		exclude_abstract				WoS_Scopus											Vanneste, T; Michelsen, O; Graae, BJ; Kyrkjeeide, MO; Holien, H; Hassel, K; Lindmo, S; Kapas, RE; De Frenne, P	2017	Impact of climate change on alpine vegetation of mountain summits in Norway	ECOLOGICAL RESEARCH	32	4	579	593	10.1007/s11284-017-1472-1	Climate change is affecting the composition and functioning of ecosystems across the globe. Mountain ecosystems are particularly sensitive to climate warming since their biota is generally limited by low temperatures. Cryptogams such as lichens and bryophytes are important for the biodiversity and functioning of these ecosystems, but have not often been incorporated in vegetation resurvey studies…
297	exclude_abstract	exclude_abstract		EK	KH		exclude_abstract				WoS_Scopus											Veiberg, V; Loe, LE; Albon, SD; Irvine, RJ; Tveraa, T; Ropstad, E; Stien, A	2017	Maternal winter body mass and not spring phenology determine annual calf production in an Arctic herbivore	OIKOS	126	7	980	987	10.1111/oik.03815	Warming of the Arctic has resulted in earlier snowmelt and green-up of plants in spring, potentially disrupting the synchrony between plant phenology and breeding phenology in herbivores. A negative relationship between offspring survival in West Greenland caribou and the timing of vegetation emergence was the first finding of such a mismatch in Arctic mammals. However, other studies indicate tha…
298	exclude_title	exclude_abstract		EK	KH		exclude_abstract				WoS_Scopus											Vindstad, OPL; Jepsen, JU; Klinghardt, M; Ek, M; Ims, RA	2017	Salvage logging of mountain birch after geometrid outbreaks: Ecological context determines management outcomes	FOREST ECOLOGY AND MANAGEMENT	405		81	91	10.1016/j.foreco.2017.09.027	Outbreaks of pest insects occasionally cause mortality of entire forest stands. Salvage logging of affected stands is the most common management response to such events. Logging may aid stand recovery by increasing the production and establishment of saplings, or stimulating the production of basal sprouts in sprouting tree species. However, the outcome of logging may depend on the ecological con…
299	include	include		EK	KH		exclude_site_coordinates	not all study sites in the arctic, include only sites 299c and 299d			WoS_Scopus	yes	yes	exclude_site_coordinates	include			MW	yes			Vowles, T; Gunnarsson, B; Molau, U; Hickler, T; Klemedtsson, L; Bjork, RG	2017	Expansion of deciduous tall shrubs but not evergreen dwarf shrubs inhibited by reindeer in Scandes mountain range	JOURNAL OF ECOLOGY	105	6	1547	1561	10.1111/1365-2745.12753	1. One of the most palpable effects of warming in Arctic ecosystems is shrub expansion above the tree line. However, previous studies have found that reindeer can influence plant community responses to warming and inhibit shrubification of the tundra. 2. We revisited grazed (ambient) and ungrazed study plots (exclosures), at the southern as well as the northern limits of the Swedish alpine region…
300	include	include		EK	KH		exclude_site_coordinates	2 study sites. The location 300b was outside the study area			WoS_Scopus	yes	yes	exclude_site_coordinates	include			ICB	yes			Vowles, T; Lovehav, C; Molau, U; Bjork, RG	2017	Contrasting impacts of reindeer grazing in two tundra grasslands	ENVIRONMENTAL RESEARCH LETTERS	12	3			10.1088/1748-9326/aa62af	Plant communities in Arctic and alpine areas are changing due to higher temperatures and longer vegetation periods and it is uncertain how this will affect plant-herbivore dynamics. For instance, relatively fast-growing, deciduous shrub species that are the most responsive to warming may also be the most targeted by herbivores such as reindeer, giving less palatable evergreen shrubs the chance to…
301	exclude_title	exclude_abstract		EK	KH		exclude_abstract				WoS_Scopus											Wang, XM; Rybczynski, N; Harington, CR; White, SC; Tedford, RH	2017	A basal ursine bear (Protarctos abstrusus) from the Pliocene High Arctic reveals Eurasian affinities and a diet rich in fermentable sugars	SCIENTIFIC REPORTS	7				10.1038/s41598-017-17657-8	The skeletal remains of a small bear (Protarctos abstrusus) were collected at the Beaver Pond fossil site in the High Arctic (Ellesmere I., Nunavut). This mid-Pliocene deposit has also yielded 12 other mammals and the remains of a boreal-forest community. Phylogenetic analysis reveals this bear to be basal to modern bears. It appears to represent an immigration event from Asia, leaving no living …
302	exclude_title	exclude_abstract		EK	KH		exclude_abstract				WoS_Scopus											Weegman, MD; Bearhop, S; Hilton, GM; Walsh, AJ; Griffin, L; Resheff, YS; Nathan, R; Fox, AD	2017	Using accelerometry to compare costs of extended migration in an arctic herbivore	CURRENT ZOOLOGY	63	6	667	674	10.1093/cz/zox056	Understanding how individuals manage costs during the migration period is challenging because individuals are difficult to follow between sites; the advent of hybrid Global Positioning System-acceleration (ACC) tracking devices enables researchers to link spatial and temporal attributes of avian migration with behavior for the first time ever. We fitted these devices on male Greenland white-front…
303	exclude_title	exclude_abstract		EK	KH		exclude_abstract				WoS_Scopus											Wielgolaski, FE; Hofgaard, A; Holtmeier, FK	2017	Sensitivity to environmental change of the treeline ecotone and its associated biodiversity in European mountains	CLIMATE RESEARCH	73	2019-02-01	151	166	10.3354/cr01474	Transition zones between mountain forests and treeless tundra, i.e. treeline ecotones, are characterized by great regional variety. In this paper, we discuss the biodiversity in various trophic levels in treeline ecotones throughout Europe, with particular focus on recent changes in land use and climate in northern and central mountains. In northernmost Europe, mountain birch prevails, while coni…
304	include	include		EK	KH		exclude_full_text				WoS_Scopus	yes	no	NA	exclude_full_text	modeling study	no_study_design	JM	no			Yu, Q; Epstein, H; Engstrom, R; Walker, D	2017	Circumpolar arctic tundra biomass and productivity dynamics in response to projected climate change and herbivory	GLOBAL CHANGE BIOLOGY	23	9	3895	3907	10.1111/gcb.13632	Satellite remote sensing data have indicated a general 'greening' trend in the arctic tundra biome. However, the observed changes based on remote sensing are the result of multiple environmental drivers, and the effects of individual controls such as warming, herbivory, and other disturbances on changes in vegetation biomass, community structure, and ecosystem function remain unclear. We apply Ar…
305	exclude_abstract	exclude_abstract		EK	KH		exclude_abstract			341	WoS_Scopus											Zamin, TJ; Cote, SD; Tremblay, JP; Grogan, P	2017	Experimental warming alters migratory caribou forage quality	ECOLOGICAL APPLICATIONS	27	7	2061	2073	10.1002/eap.1590/full	Global declines in caribou and reindeer (Rangifer) populations have drawn attention to the myriad of stressors that these Arctic and boreal forest herbivores currently face. Arctic warming has resulted in increased tundra shrub growth and therefore Rangifer forage quantity. However, its effects on forage quality have not yet been addressed although they may be critical to Rangifer body condition …
306	exclude_title	exclude_title		EK	KH		exclude_title				WoS_Scopus											Zazula, GD; MacPhee, RDE; Southon, J; Nalawade-Chavan, S; Reyes, AV; Hewitson, S; Hall, E	2017	A case of early Wisconsinan "over-chill": New radiocarbon evidence for early extirpation of western camel (Camelops hestemus) in eastern Beringia	QUATERNARY SCIENCE REVIEWS	171		48	57	10.1016/j.quascirev.2017.06.031	There are comparatively few fossils that document the presence of the Pleistocene western camel (Camelops hestemus) in the unglaciated regions of Alaska and Yukon, northwestern North America (eastern Beringia). It has been previously reported on the basis of stratigraphic and radiocarbon data that this species was present within this region from the Sangamonian interglaciation (Marine Isotope Sta…
307	exclude_title	include		EK	KH		include			342	WoS_Scopus	yes	yes	include	include			JF, MS	yes			Zhou, JK; Prugh, L; Tape, KD; Kofinas, G; Kielland, K	2017	The role of vegetation structure in controlling distributions of vertebrate herbivores in Arctic Alaska	ARCTIC ANTARCTIC AND ALPINE RESEARCH	49	2	291	304	10.1657/AAAR0016-058	Climate-driven shrub expansion is altering the distribution of animal communities in the Arctic. A better understanding of habitat requirements is needed to accurately predict the response of herbivore communities to shrub expansion. We examined patterns of browsing by moose (Alces alces), snowshoe hare (Lepus americanus), and ptarmigan (Lagopus lagopus, L. muta) across the tundra of northern Ala…
308	exclude_title	exclude_title		EK	KH		exclude_title				WoS_Scopus											Zmudczynska-Skarbek, K; Balazy, P	2017	Following the flow of ornithogenic nutrients through the Arctic marine coastal food webs	JOURNAL OF MARINE SYSTEMS	168		31	37	10.1016/j.jmarsys.2016.12.006	Arctic colonial seabirds are recognized as effective fertilizers of terrestrial ecosystems by delivering marine-origin nutrients to the vicinities of their nesting sites. A proportion of this ornithogenic matter is then thought to return to the sea and, concentrated within a smaller area, locally provides additional nutrients for the nearshore marine communities. The aim of this study was to asse…
309	exclude_title	exclude_abstract		EK	KH		exclude_abstract				WoS_Scopus											Zou, YA; Tang, Y; Xie, YH; Zhao, QH; Zhang, H	2017	Response of herbivorous geese to wintering habitat changes: conservation insights from long-term population monitoring in the East Dongting Lake, China	REGIONAL ENVIRONMENTAL CHANGE	17	3	879	888	10.1007/s10113-016-1087-z	The majority of Eastern China's herbivorous geese overwinter in the East Dongting Lake, China, and there is growing concern about how changes in their habitats can affect the goose populations. General linear regressions were used to analyze the relationship between changes in the abundances of three herbivorous geese (Eastern Tundra Bean Goose Anser fabalis serrirostris, Lesser White-fronted Gee…
310	co-author	correction of original paper, no author or abstract, probably Kaarlejärvi et al. => duplicate?		EK	KH		remove_correction	correction to already published paper			WoS_Scopus					correction to already published paper						[No author name available]	2017	Correction: Herbivores rescue diversity in warming tundra by modulating trait-dependent species losses and gains (Nature Communications (2017) 8 (419) DOI: 10.1038/s41467-017-00554-z)	Nature Communications	8	1			10.1038/s41467-017-02129-4	The original version of this Article contained errors in Figure 2. The dark green symbols on the scatter plot were light green, and vice versa. These errors have now been corrected in the PDF and HTML versions of the Article. © 2017 The Author(s).
311	exclude_title	exclude_abstract		EK	KH		exclude_abstract				WoS_Scopus											Adaev V.N.	2017	The mountain nenets of the polar urals: Features of traditional culture and landscape use by a local ethnic group	Ural'skij Istoriceskij Vestnik	55	2	25	34		The paper presents the distinctive cultural features of the Ural Mountain Nenets, allowing, in the author's opinion, to consider them as a separate local ethnic group of the Tundra Nenets. The community is called Peh Ter (mountain people). With very little described in scientific literature, these findings would be of interest not only in theoretical terms (on the diff erentiation of local ethnic…
312	exclude_abstract	exclude_abstract		EK	KH		remove_duplicate			195	WoS_Scopus											Beumer L.T., Varpea O., Hansen B.B.	2017	Cratering behaviour and faecal C: N ratio in relation to seasonal snowpack characteristics in a high-arctic ungulate	Polar Research	36	1			10.1080/17518369.2017.1286121	Snow and ice determine winter forage availability for Arctic herbivores. Winter precipitation is anticipated to increase, and icing following warm spells and rain-on-snow (ROS) are likely to become more frequent. While this may reduce herbivore survival, fecundity and population growth, we can also expect behavioural and dietary responses. Here, we tested predictions from optimal foraging theory …
313	exclude_title	exclude_title		EK	KH		exclude_title				WoS_Scopus											Burukovsky R.N.	2017	Feeding ecology of the shrimp Crangon allmanni Kinahan, 1860 (Decapoda, Crangonidae) in the North and White seas	Crustaceana	90	2019-10-07	865	881	10.1163/15685403-00003568	The food composition of the shrimp Crangon allmanni from the Helgoland Trench (North Sea) and Onega Bay (White Sea) is described. The main food items (>60%) include detritus, representatives of about 30 benthic species, dominated by polychaetes, malacostracans, ophiuroids, bivalves and ophistobranchs (Cylichna, Diaphana spp.) as well as plant remains. In the North Sea, C. allmanni is closer to an…
314	exclude_title	exclude_title		EK	KH		remove_duplicate			206	WoS_Scopus											Cleary A.C., Søreide J.E., Freese D., Niehoff B., Gabrielsen T.M.	2017	Feeding by Calanus glacialis in a high arctic fjord: Potential seasonal importance of alternative prey	ICES Journal of Marine Science	74	7	1937	1946	10.1093/icesjms/fsx106	The copepod species Calanus glacialis is an important component of arctic marine food webs, where it is the numerically dominant zooplankton grazer and serves as a major prey item for fish, seabirds, and other predators. These copepods are typically considered to be phytoplanktivorous, although they are also known to feed on microzooplankton, and little is known about their diet in fall and winte…
315	exclude_title	exclude_title		EK	KH		exclude_title				WoS_Scopus											Cullen T.M., Evans D.C.	2017	Erratum to: Palaeoenvironmental drivers of vertebrate community composition in the Belly River Group (Campanian) of Alberta, Canada, with implications for dinosaur biogeography [BMC Ecol, 16, (2016) (52)] DOI: 10.1186/s12898-016-0106-8	BMC Ecology	17	1			10.1186/s12898-016-0111-y	After publication of the original article [1], it was brought to our attention that the phrase 'a lack of sensitivity to subtle environmental gradients casts doubt on these forces acting as a driver of putative endemism of dinosaur populations in the Late Cretaceous of North America' in "Conclusion" section should read 'a lack of sensitivity to subtle environmental gradients casts doubt on these …
316	exclude_title	exclude_abstract		EK	KH		remove_duplicate			212	WoS_Scopus											Descamps S., Aars J., Fuglei E., Kovacs K.M., Lydersen C., Pavlova O., Pedersen Å.Ø., Ravolainen V., Strøm H.	2017	Climate change impacts on wildlife in a High Arctic archipelago – Svalbard, Norway	Global Change Biology	23	2	490	502	10.1111/gcb.13381	The Arctic is warming more rapidly than other region on the planet, and the northern Barents Sea, including the Svalbard Archipelago, is experiencing the fastest temperature increases within the circumpolar Arctic, along with the highest rate of sea ice loss. These physical changes are affecting a broad array of resident Arctic organisms as well as some migrants that occupy the region seasonally.…
317	exclude_title	exclude_title		EK	KH		remove_duplicate			214	WoS_Scopus											Elliott S., Jeffery N., Hunke E., Deal C., Jin M., Wang S., Smith E.E., Oestreicher S.	2017	Strategies for the simulation of sea ice organic chemistry: Arctic tests and development	Geosciences (Switzerland)	7	3	1	38	10.3390/geosciences7030052	A numerical mechanism connecting ice algal ecodynamics with the buildup of organic macromolecules is tested within modeled pan-Arctic brine channels. The simulations take place of?ine in a reduced representation of sea ice geochemistry. Physical driver quantities derive from the global sea ice code CICE, including snow cover, thickness and internal temperature. The framework is averaged over ten …
318	co-author	duplicate		EK	KH		remove_duplicate			216	WoS_Scopus											Eskelinen A., Kaarlejärvi E., Olofsson J.	2017	Herbivory and nutrient limitation protect warming tundra from lowland species’ invasion and diversity loss	Global Change Biology	23	1	245	255	10.1111/gcb.13397	Herbivory and nutrient limitation can increase the resistance of temperature-limited systems to invasions under climate warming. We imported seeds of lowland species to tundra under factorial treatments of warming, fertilization, herbivore exclusion and biomass removal. We show that warming alone had little impact on lowland species, while exclusion of native herbivores and relaxation of nutrient…
319	exclude_title	exclude_abstract		EK	KH		exclude_abstract				WoS_Scopus											Eythórsson E., Tombre I.M., Madsen J.	2017	Goose management schemes to resolve conflicts with agriculture: Theory, practice and effects	Ambio	46		231	240	10.1007/s13280-016-0884-4	In 2012, the four countries hosting the Svalbard population of pink-footed goose Anser brachyrhynchus along its flyway launched an International Species Management Plan for the population. One of the aims was to reduce conflicts between geese and agriculture to an acceptable level. Since 2006, Norway has offered subsidies to farmers that provide refuge areas for geese on their land. We evaluate t…
320	exclude_title	exclude_title		EK	KH		exclude_title				WoS_Scopus											Galloway D.	2017	Restoring the rangelands	Methods for Sustainability Research			265	279	10.4337/9781786432735.00029	Rangelands, defined as arid and semi-arid grasslands, scrublands and tundra, make up approximately 50 percent of the earth’s terrestrial surfaces. Historically the lack of rain and its irregularity meant they were used for nomadic grazing. Today due to a range of factors, including grazing pressure, most rangelands are significantly degraded. At the same time, many have become major mineral and e…
321	exclude_abstract	exclude_abstract		EK	KH		exclude_abstract				WoS_Scopus											Guillemot T., Bichet V., Gauthier E., Zocatelli R., Massa C., Richard H.	2017	Environmental responses of past and recent agropastoral activities on south Greenlandic ecosystems through molecular biomarkers	Holocene	27	6	783	795	10.1177/0959683616675811	Paleoenvironmental studies previously performed on Lake Igaliku revealed two agropastoral phases in south Greenland: the Norse settlement from AD 986 to ca. AD 1450 and the recent installation of sheep farmers, since the 1920s. To improve the knowledge of the timing and magnitude of the Greenlandic agropastoral activities, a lipid inventory was realized and compared with biological and geochemica…
322	include	duplicate		EK	KH		remove_duplicate			229, 3350	WoS_Scopus											Heggenes J., Odland A., Chevalier T., Ahlberg J., Berg A., Larsson H., Bjerketvedt D.K.	2017	Herbivore grazing—or trampling? Trampling effects by a large ungulate in cold high-latitude ecosystems	Ecology and Evolution	7	16	6423	6431	10.1002/ece3.3130	Mammalian herbivores have important top-down effects on ecological processes and landscapes by generating vegetation changes through grazing and trampling. For free-ranging herbivores on large landscapes, trampling is an important ecological factor. However, whereas grazing is widely studied, low-intensity trampling is rarely studied and quantified. The cold-adapted northern tundra reindeer (Rang…
323	include	exclude_abstract		EK	KH		remove_duplicate			230, 3463	WoS_Scopus	yes	no	NA	exclude_full_text	review		JM	no			Henden J.-A., Ims R.A., Fuglei E., Pedersen Å.Ø.	2017	Changed Arctic-alpine food web interactions under rapid climate warming: Implication for ptarmigan research	Wildlife Biology	2017				10.2981/wlb.00240	Ptarmigan are herbivorous birds that are year-round residents of alpine and arctic ecosystems - presently subjected to the most rapid climate warming on earth. Yet, compared to other bird taxa there has been little climate impact research on ptarmigan. Ptarmigan population dynamics, in particular in the sub/low-arctic, appears to be strongly influenced by complex interactions with a suite of func…
324	exclude_title	duplicate		EK	KH		remove_duplicate			232	WoS_Scopus											Hogrefe K.R., Patil V.P., Ruthrauff D.R., Meixell B.W., Budde M.E., Hupp J.W., Ward D.H.	2017	Normalized difference vegetation index as an estimator for abundance and quality of Avian Herbivore Forage in Arctic Alaska	Remote Sensing	9	12			10.3390/rs9121234	Tools that can monitor biomass and nutritional quality of forage plants are needed to understand how arctic herbivores may respond to the rapidly changing environment at high latitudes. The Normalized Difference Vegetation Index (NDVI) has been widely used to assess changes in abundance and distribution of terrestrial vegetative communities. However, the efficacy of NDVI to measure seasonal chang…
325	exclude_title	duplicate		EK	KH		remove_duplicate			233	WoS_Scopus											Horstkotte T., Utsi T.A.A., Larsson-Blind A., Burgess P., Johansen B., Kayhk J., Oksanen L., Forbes B.C.	2017	Human–animal agency in reindeer management: Sami herders’ perspectives on vegetation dynamics under climate change	Ecosphere	8	9			10.1002/ecs2.1931	Many primary livelihoods in Arctic and sub-Arctic regions experience accelerating effects of environmental change. The often close connection between indigenous peoples and their respective territories allows them to make detailed observations of how these changes transform the landscapes where they practice their daily activities. Here, we report Sami reindeer herders’ observations based on thei…
326	exclude_title	exclude_title		EK	KH		exclude_title				WoS_Scopus											Huntsinger L., Sayre N.F.	2017	Landscape stewardship for rangelands	The Science and Practice of Landscape Stewardship			284	305	10.1017/9781316499016.029	Rangelands encompass between one-third and one-half of the ice-free land on Earth (Fig. 15.1). They are lands on which the vegetation is predominantly grasses, grass-like plants, forbs, or shrubs suitable for grazing or browsing; grasslands, steppe, tundra, scrublands and savannas are all considered rangelands (Booker et al. 2013) and provide multiple environmental benefits. Hunting, trekking, ca…
327	exclude_title	include		EK	KH		exclude_full_text			238	WoS_Scopus	yes	yes	include	exclude_full_text	effects of warming and nutrient addition on shrub dendro	no_outcome	MV, OG	no			Iturrate-Garcia M., Heijmans M.M.P.D., Schweingruber F.H., Maximov T.C., Niklaus P.A., Schaepman-Strub G.	2017	Shrub growth rate and bark responses to soil warming and nutrient addition – A dendroecological approach in a field experiment	Dendrochronologia	45		12	22	10.1016/j.dendro.2017.07.001	Tundra shrubs are slow-growing species limited by low air temperature and scarce nutrient availability. However, shrub expansion has been widely observed in the Arctic during the last decades and attributed to climate warming. Shift in shrub growth, wood structure and abundance affects the surface albedo and permafrost thawing and these changes may feedback to climate. Despite the importance of s…
328	exclude_title	exclude_abstract		EK	KH		exclude_abstract			185	WoS_Scopus											John Anderson N., Saros J.E., Bullard J.E., Cahoon S.M.P., McGowan S., Bagshaw E.A., Barry C.D., Bindler R., Burpee B.T., Carrivick J.L., Fowler R.A., Fox A.D., Fritz S.C., Giles M.E., Hamerlik L., Ingeman-Nielsen T., Law A.C., Mernild S.H., Northington R.M., Osburn C.L., Pla-Rabès S., Post E., Telling J., Stroud D.A., Whiteford E.J., Yallop M.L., Yde J.C.	2017	The arctic in the twenty-first century: Changing biogeochemical linkages across a paraglacial landscape of Greenland	BioScience	67	2	118	133	10.1093/biosci/biw158	The Kangerlussuaq area of southwest Greenland encompasses diverse ecological, geomorphic, and climate gradients that function over a range of spatial and temporal scales. Ecosystems range from the microbial communities on the ice sheet and moisture-stressed terrestrial vegetation (and their associated herbivores) to freshwater and oligosaline lakes. These ecosystems are linked by a dynamic glacio…
329	co-author	duplicate		EK	KH		remove_correction				WoS_Scopus											Kaarlejärvi E., Eskelinen A., Olofsson J.	2017	Erratum: Author Correction: Herbivores rescue diversity in warming tundra by modulating trait-dependent species losses and gains (Nature communications (2017) 8 1 (419))	Nature communications	8	1	2283		10.1038/s41467-017-02129-4	The original version of this Article contained errors in Figure 2. The dark green symbols on the scatter plot were light green, and vice versa. These errors have now been corrected in the PDF and HTML versions of the Article.
330	exclude_title	exclude_abstract		EK	KH		exclude_abstract			241	WoS_Scopus											Kaltenborn B.P., Linnell J.D.C., Thomassen J., Lindhjem H.	2017	Complacency or resilience? Perceptions of environmental and social change in Lofoten and Vesterålen in northern Norway	Ocean and Coastal Management	138		29	37	10.1016/j.ocecoaman.2017.01.010	Arctic and northern coastal regions are among the least developed in the world in terms of density of settlements, population and resource exploitation. It is often assumed that these regions will be frontiers of future change, conflict and opportunity due to climate change, new transportation routes, geopolitical tensions and increasing demands for their natural resources. But to what degree do …
331	exclude_title	exclude_title		EK	KH		remove_duplicate			247	WoS_Scopus											Kryukov V.Y., Tyurin M.V., Tomilova O.G., Yaroslavtseva O.N., Kryukova N.A., Duisembekov B.A., Tokarev Y.S., Glupov V.V.	2017	Immunosuppression of insects by the venom of Habrobracon hebetor increases the sensitivity of bait method for the isolation of entomopathogenic fungi from soils	Biology Bulletin	44	4	401	405	10.1134/S1062359017030050	We evaluated the susceptibility of Galleria mellonella larvae immunosuppressed by the venom of Habrobracon hebetor to soil entomopathogenic ascomycetes with the use of bait method. It was found that the sensitivity of the modified method was significantly (by almost 200 times) increased as compared with the standard procedure, which provided the isolation of fungi when their abundance was extreme…
332	include	duplicate		EK	KH		remove_duplicate			252	WoS_Scopus											Lara M.J., Johnson D.R., Andresen C., Hollister R.D., Tweedie C.E.	2017	Peak season carbon exchange shifts from a sink to a source following 50+ years of herbivore exclusion in an Arctic tundra ecosystem	Journal of Ecology	105	1	122	131	10.1111/1365-2745.12654	To date, the majority of our knowledge regarding the impacts of herbivory on arctic ecosystem function has been restricted to short-term (&lt;5 years) exclusion or manipulation experiments. Our understanding of long-term responses of sustained herbivory and/or herbivore exclusion on arctic tundra ecosystem function is severely limited. Recent evidence suggests lemming population outbreaks, which …
333	exclude_title	duplicate		EK	KH		remove_duplicate			257	WoS_Scopus											Loginov V.G., Ignatyeva M.N., Balashenko V.V.	2017	Harm to the resources of traditional nature management and its economic evaluation	Economy of Region	13	2	396	409	10.17059/2017-2-6	The Yamal region occupies the fifth part of the Yamal-Nenets Autonomous District. Therefore it is one of the territories where traditional natural resource management is mainly developing. Its key branches are reindeer herding and fisheries. The major problems in the development of industries are due to an active industrial and transport exploitation of the tundra zone; the situation in reindeer …
334	include	duplicate		EK	KH		remove_duplicate			262	WoS_Scopus											Martin A.C., Jeffers E.S., Petrokofsky G., Myers-Smith I., MacIas-Fauria M.	2017	Shrub growth and expansion in the Arctic tundra: An assessment of controlling factors using an evidence-based approach	Environmental Research Letters	12	8			10.1088/1748-9326/aa7989	Woody shrubs have increased in biomass and expanded into new areas throughout the Pan-Arctic tundra biome in recent decades, which has been linked to a biome-wide observed increase in productivity. Experimental, observational, and socio-ecological research suggests that air temperature - and to a lesser degree precipitation - trends have been the predominant drivers of this change. However, a pro…
335	exclude_title	exclude_title		EK	KH		exclude_title				WoS_Scopus											Pond C.M.	2017	The evolution of mammalian adipose tissues	Adipose Tissue Biology: Second Edition			1	59	10.1007/978-3-319-52031-5_1	Anatomical organization, genes and metabolic pathways in white, beige and brown adipose tissues are traced from their invertebrate origins through lower vertebrates to mammals and birds. Invertebrate storage organs and adipose tissues of lower vertebrates are also metabolic regulators. In large turtles, some depots are thermogenic or insulators. Reptilian, avian and mammalian adipocytes sort fatt…
336	exclude_title	exclude_title		EK	KH		exclude_title				WoS_Scopus											Rajakumari V., Kalyanaraman Rajagopal I., Mohanasundaram S.	2017	Endophytic fungi a novel source of bioactive compounds for Pharmaceutical industry	International Journal of Research in Pharmaceutical Sciences	8	3	451	454		Over the past two decades, remarkable progress has been made to further elucidate the significances of endophytic fungi. The prime focus being the treasure of products which are of medically important. They are found to be anticancer, antioxidants, antifungal, etc. Similarly, in recent years a tremendous progress has been made on developing them into an important medical tool in the therapy of va…
337	exclude_title	exclude_title		EK	KH		remove_duplicate			277	WoS_Scopus											Rey F., Gobet E., van Leeuwen J.F.N., Gilli A., van Raden U.J., Hafner A., Wey O., Rhiner J., Schmocker D., Zünd J., Tinner W.	2017	Vegetational and agricultural dynamics at Burgäschisee (Swiss Plateau) recorded for 18,700 years by multi-proxy evidence from partly varved sediments	Vegetation History and Archaeobotany	26	6	571	586	10.1007/s00334-017-0635-x	Little is known about the timing and the vegetation dynamics shortly after the Last Glacial Maximum (LGM) on the Swiss Plateau 19,000–15,000 cal bp. Subsequent Late Glacial and Holocene vegetation changes are better known; however, it is unclear if the few available palynological and macrofossil records are able to capture the entire vegetation variability of the region. A new palaeoecological mu…
338	exclude_title	exclude_title		EK	KH		exclude_title				WoS_Scopus											Tattoni C., Ianni E., Geneletti D., Zatelli P., Ciolli M.	2017	Landscape changes, traditional ecological knowledge and future scenarios in the Alps: A holistic ecological approach	Science of the Total Environment	579		27	36	10.1016/j.scitotenv.2016.11.075	In recent decades, a dramatic landscape change has occurred in the European alpine region: open areas have been naturally recolonized by forests as traditional agricultural and forest activities were reduced and reorganized. Land use changes (LUC) are generally measured through GIS and photo interpretation techniques, but despite many studies focused on this phenomenon and its effects on biodiver…
339	include	exclude_abstract		EK	KH		exclude_full_text				WoS_Scopus	yes	yes	include	exclude_full_text	isotopic composition of different plants as diet of caribou	no_comparator	MV, OG	no			Vansomeren L.L., Barboza P.S., Gustine D.D., Syndonia Bret-Harte M.	2017	Variation in ?15N and ?13C values of forages for Arctic caribou: effects of location, phenology and simulated digestion	Rapid Communications in Mass Spectrometry	31	9	813	820	10.1002/rcm.7849	Rationale: The use of stable isotopes for dietary estimates of wildlife assumes that there are consistent differences in isotopic ratios among diet items, and that the differences in these ratios between the diet item and the animal tissues (i.e., fractionation) are predictable. However, variation in isotopic ratios and fractionation of ?13C and ?15N values among locations, seasons, and forages a…
340	exclude_title	exclude_title		EK	KH		exclude_title				WoS_Scopus											Vernet M., Richardson T.L., Metfies K., Eva-Maria Nöthig, Peeken I.	2017	Models of plankton community changes during a warm water anomaly in Arctic waters show altered trophic pathways with minimal changes in carbon export	Frontiers in Marine Science	4	MAY			10.3389/fmars.2017.00160	Carbon flow through pelagic food webs is an expression of the composition, biomass and activity of phytoplankton as primary producers. In the near future, severe environmental changes in the Arctic Ocean are expected to lead to modifications of phytoplankton communities. Here, we used a combination of linear inverse modeling and ecological network analysis to study changes in food webs before, du…
341	exclude_title	duplicate		EK	KH		remove_duplicate			305	WoS_Scopus											Zamin T.J., Côté S.D., Tremblay J.-P., Grogan P.	2017	Experimental warming alters migratory caribou forage quality:	Ecological Applications	27	7	2061	2073	10.1002/eap.1590	Global declines in caribou and reindeer (Rangifer) populations have drawn attention to the myriad of stressors that these Arctic and boreal forest herbivores currently face. Arctic warming has resulted in increased tundra shrub growth and therefore Rangifer forage quantity. However, its effects on forage quality have not yet been addressed although they may be critical to Rangifer body condition …
342	exclude_title	duplicate		EK	KH		remove_duplicate			307	WoS_Scopus											Zhou J., Prugh L., Tape K.D., Kofinas G., Kielland K.	2017	The role of vegetation structure in controlling distributions of vertebrate herbivores in arctic Alaska	Arctic, Antarctic, and Alpine Research	49	2	291	304	10.1657/AAAR0016-058	Climate-driven shrub expansion is altering the distribution of animal communities in the Arctic. A better understanding of habitat requirements is needed to accurately predict the response of herbivore communities to shrub expansion. We examined patterns of browsing by moose (Alces alces), snowshoe hare (Lepus americanus), and ptarmigan (Lagopus lagopus, L. muta) across the tundra of northern Ala…
343	exclude_title	exclude_abstract		EK	KH		exclude_abstract				WoS_Scopus											Alfsnes, K; Hobaek, A; Weider, LJ; Hessen, DO	2016	Birds, nutrients, and climate change: mtDNA haplotype diversity of Arctic Daphnia on Svalbard revisited	POLAR BIOLOGY	39	8	1425	1437	10.1007/s00300-015-1868-8	Ecosystems in the high Arctic are in transition due to climate change and species shifts. On the Svalbard archipelago, the average annual temperature has increased by more than 2 A degrees C over the past 30 years, and there has been a striking increase in breeding populations of geese. Birds serve as a dominant source of nutrients (via faeces) and may also serve as vectors of dispersal of many s…
344	exclude_title	exclude_title		EK	KH		exclude_title				WoS_Scopus											Amundson, CL; Traub, NJ; Smith-Herron, AJ; Flint, PL	2016	Helminth community structure in two species of arctic-breeding waterfowl	INTERNATIONAL JOURNAL FOR PARASITOLOGY-PARASITES AND WILDLIFE	5	3	263	272	10.1016/j.ijppaw.2016.09.002	Climate change is occurring rapidly at high latitudes, and subsequent changes in parasite communities may have implications for hosts including wildlife and humans. Waterfowl, in particular, harbor numerous parasites and may facilitate parasite movement across broad geographic areas due to migratory movements. However, little is known about helminth community structure of waterfowl at northern la…
345	include	include		EK	KH		exclude_full_text			468, 3320, 3466	WoS_Scopus	yes	yes	include	exclude_full_text	no relevant response variables	no_outcome	AK, ICB	no			Anderson, HB; Speed, JDM; Madsen, J; Pedersen, AO; Tombre, IM; van der Wal, R	2016	Late snow melt moderates herbivore disturbance of the Arctic tundra	ECOSCIENCE	23	2019-02-01	29	39	10.1080/11956860.2016.1212684	Resilience of tundra vegetation to disturbance by herbivores can be low and lead to ecosystem state shifts. Pink-footed geese Anser brachyrhynchus are the most numerous herbivore on Svalbard and disturb vegetation when foraging for below-ground plant biomass (grubbing). We assessed grubbing extent (occurrence of vegetation disturbance) and intensity (proportion of vegetation disturbed) in 2006/07…
346	exclude_title	exclude_title		EK	KH		exclude_title				WoS_Scopus											Arendt, KE; Agersted, MD; Sejr, MK; Juul-Pedersen, T	2016	Glacial meltwater influences on plankton community structure and the importance of top-down control (of primary production) in a NE Greenland fjord	ESTUARINE COASTAL AND SHELF SCIENCE	183		123	135	10.1016/j.ecss.2016.08.026	Freshwater runoff from the Greenland Ice Sheet (GIS) can be an important driver influencing plankton community structure in Greenland fjords. In the present study, we describe physical, taxonomic and functional differences in the plankton community in Young Sound, a NE Greenland fjord, from the inner fjord close to the GIS towards the coastal region in late summer. The fjord is influenced by runo…
347	exclude_title	exclude_abstract		EK	KH		exclude_abstract				WoS_Scopus											Auger-Methe, M; Derocher, AE; DeMars, CA; Plank, MJ; Codling, EA; Lewis, MA	2016	Evaluating random search strategies in three mammals from distinct feeding guilds	JOURNAL OF ANIMAL ECOLOGY	85	5	1411	1421	10.1111/1365-2656.12562	1. Searching allows animals to find food, mates, shelter and other resources essential for survival and reproduction and is thus among the most important activities performed by animals. Theory predicts that animals will use random search strategies in highly variable and unpredictable environments. Two prominent models have been suggested for animals searching in sparse and heterogeneous environ…
348	exclude_title	exclude_title		EK	KH		exclude_title				WoS_Scopus											Bandara, K; Varpe, O; Soreide, JE; Wallenschus, J; Berge, J; Eiane, K	2016	Seasonal vertical strategies in a high-Arctic coastal zooplankton community	MARINE ECOLOGY PROGRESS SERIES	555		49	64	10.3354/meps11831	We studied the larger (> 1000 mu m) size fraction of zooplankton in an Arctic coastal water community in Billefjorden, Svalbard ( 78 degrees 40' N), Norway, in order to describe seasonal vertical distributions of the dominant taxa in relation to environmental variability. Calanus spp. numerically dominated the herbivores; Aglantha digitale, Mertensia ovum, Beroe cucumis, and Parasagitta elegans w…
349	exclude_title	exclude_abstract		EK	KH		exclude_abstract				WoS_Scopus											Barrett, RT; Hollister, RD	2016	Arctic plants are capable of sustained responses to long-term warming	POLAR RESEARCH	35				10.3402/polar.v35.25405	Previous studies have shown that Arctic plants typically respond to warming with increased growth and reproductive effort and accelerated phenology, and that the magnitude of these responses is likely to change over time. We investigated the effects of long-term experimental warming on plant growth (leaf length) and reproduction (inflorescence height, reproductive phenology and reproductive effor…
350	exclude_title	co-author	exclude_abstract	EK	KH	IK	exclude_abstract				WoS_Scopus											Barrio, IC; Bueno, CG; Gartzia, M; Soininen, EM; Christie, KS; Speed, JDM; Ravolainen, VT; Forbes, BC; Gauthier, G; Horstkotte, T; Hoset, KS; Hoye, TT; Jonsdottir, IS; Levesque, E; Morsdorf, MA; Olofsson, J; Wookey, PA; Hik, DS	2016	Biotic interactions mediate patterns of herbivore diversity in the Arctic	GLOBAL ECOLOGY AND BIOGEOGRAPHY	25	9	1108	1118	10.1111/geb.12470	AimUnderstanding the forces shaping biodiversity patterns, particularly for groups of organisms with key functional roles, will help predict the responses of ecosystems to environmental changes. Our aim was to evaluate the relative role of different drivers in shaping the diversity patterns of vertebrate herbivores, a group of organisms exerting a strong trophic influence in terrestrial Arctic ec…
351	include	include		EK	KH		exclude_site_coordinates	Kluane, SW Yukon		469	WoS_Scopus	yes	yes	exclude_site_coordinates								Barrio, IC; Bueno, CG; Hik, DS	2016	Warming the tundra: reciprocal responses of invertebrate herbivores and plants	OIKOS	125	1	20	28	10.1111/oik.02190	Rapid warming in northern ecosystems is simultaneously influencing plants, herbivores and the interactions among them. Recent studies suggest that herbivory could buffer plant responses to environmental change, but this has only been shown for vertebrate herbivores so far. The role of invertebrate herbivory in tundra ecosystems is often overlooked, but can be relevant in determining the structure…
352	exclude_title	exclude_title		EK	KH		exclude_title			3334, 3465	WoS_Scopus											Barrio, IC; Hik, DS; Jonsdottir, IS; Bueno, CG; Morsdorf, MA; Ravolainen, VT	2016	Herbivory Network: An international, collaborative effort to study herbivory in Arctic and alpine ecosystems	POLAR SCIENCE	10	3	297	302	10.1016/j.polar.2016.03.001	Plant-herbivore interactions are central to the functioning of tundra ecosystems, but their outcomes vary over space and time. Accurate forecasting of ecosystem responses to ongoing environmental changes requires a better understanding of the processes responsible for this heterogeneity. To effectively address this complexity at a global scale, coordinated research efforts, including multi-site c…
353	include	include		EK	KH		exclude_site_text				WoS_Scopus	yes	no	exclude_site_text				JM	no			Birkemoe, T; Bergmann, S; Hasle, TE; Klanderud, K	2016	Experimental warming increases herbivory by leaf-chewing insects in an alpine plant community	ECOLOGY AND EVOLUTION	6	19	6955	6962	10.1002/ece3.2398	Climate warming is predicted to affect species and trophic interactions worldwide, and alpine ecosystems are expected to be especially sensitive to changes. In this study, we used two ongoing climate warming (open-top chambers) experiments at Finse, southern Norway, to examine whether warming had an effect on herbivory by leaf-chewing insects in an alpine Dryas heath community. We recorded feedin…
354	exclude_title	exclude_title		EK	KH		exclude_title				WoS_Scopus											Boas, SW; Slotsbo, S; Silva, ALP; Larsen, MM; Damgaard, C; Holmstrup, M	2016	Increased frequency of freeze-thaw events in a future climate can significantly increase negative effects of copper on enchytraeids	APPLIED SOIL ECOLOGY	107		272	278	10.1016/j.apsoil.2016.06.011	Many anthropogenic activities negatively affect the environment and stress the organisms living there. Metals are some of the most common contaminants in temperate climate soils, and recent mining activities in subarctic and arctic regions further emphasize the need for focus on the environmental impact in cold climate regions. The present study investigated how the combination of sub-zero temper…
355	exclude_title	exclude_title		EK	KH		exclude_title				WoS_Scopus											Boeskorov, GG; Potapova, OR; Protopopov, AV; Plotnikov, VV; Agenbroad, LD; Kirikov, KS; Pavlov, IS; Shchelchkova, MV; Belolyubskii, IN; Tomshin, MD; Kowalczyk, R; Davydov, SP; Kolesov, SD; Tikhonov, AN; van der Plicht, J	2016	The Yukagir Bison: The exterior morphology of a complete frozen mummy of the extinct steppe bison, Bison priscus from the early Holocene of northern Yakutia, Russia	QUATERNARY INTERNATIONAL	406		94	110	10.1016/j.quaint.2015.11.084	The paper presents analyses of the exterior morphology of one of the extinct and dominating species of the Late Pleistocene megafauna of Eurasia, the steppe bison, Bison priscus. The frozen mummy of the Yukagir Bison found in northern Yakutia, Russia represents the most complete specimen of this species in the world. It belongs to a young, 4.1-4.5 year old male, which dates back about 10,500 cal …
356	exclude_title	exclude_title		EK	KH		exclude_title				WoS_Scopus											Boissonnot, L; Niehoff, B; Hagen, W; Soreide, JE; Graeve, M	2016	Lipid turnover reflects life-cycle strategies of small-sized Arctic copepods	JOURNAL OF PLANKTON RESEARCH	38	6	1420	1432	10.1093/plankt/fbw076	This study aimed at understanding how life-cycle strategies of the primarily herbivorous Pseudocalanus minutus and the omnivorous Oithona similis are reflected by their lipid carbon turnover capacities. The copepods were collected in Billefjorden, Svalbard, and fed with C-13 labeled flagellates and diatoms during 3 weeks. Fatty acid (FA) and fatty alcohol compositions were determined by gas chrom…
357	exclude_title	exclude_title		EK	KH		exclude_title				WoS_Scopus											Boonstra, R; Andreassen, HP; Boutin, S; Husek, J; Ims, RA; Krebs, CJ; Skarpe, C; Wabakken, P	2016	Why Do the Boreal Forest Ecosystems of Northwestern Europe Differ from Those of Western North America?	BIOSCIENCE	66	9	722	734	10.1093/biosci/biw080	The boreal forest is one of the largest terrestrial biomes on Earth. Conifers normally dominate the tree layer across the biome, but other aspects of ecosystem structure and dynamics vary geographically. The cause of the conspicuous differences in the understory vegetation and the herbivore-predator cycles between northwestern Europe and western North America presents an enigma. Ericaceous dwarf …
358	exclude_abstract	exclude_abstract		EK	KH		exclude_abstract				WoS_Scopus											Boulanger-Lapointe, N; Levesque, E; Baittinger, C; Schmidt, NM	2016	Local variability in growth and reproduction of Salix arctica in the High Arctic	POLAR RESEARCH	35				10.3402/polar.v35.24126	Arctic terrestrial ecosystems are heterogeneous because of the strong influences of microtopography, soil moisture and snow accumulation on vegetation distribution. The interaction between local biotic and abiotic factors and global climate patterns will influence species responses to climate change. Salix arctica (Arctic willow) is a structuring species, ubiquitous and widespread, and as such is…
359	exclude_abstract	exclude_abstract		EK	KH		exclude_abstract				WoS_Scopus											Brathen, KA; Lortie, C	2016	A portfolio effect of shrub canopy height on species richness in both stressful and competitive environments	FUNCTIONAL ECOLOGY	30	1	60	69	10.1111/1365-2435.12458	1. Facilitating effects of benefactor plants on plant species richness have been commonly tested in stressful habitats because competitive effects are assumed to predominate in more productive habitats. Here, we examine this assumption by testing whether benefactor plants can nonetheless be facilitating in competitive environments. 2. We provide a conceptual framework describing how a trait of be…
360	exclude_title	exclude_title		EK	KH		exclude_title				WoS_Scopus											Calero-Bernal, R; Cerqueira-Cezar, CK; Verma, SK; Mowery, J; Carmena, D; Beckmen, K; Dubey, JP	2016	Sarcocystis arctica (Apicomplexa: Sarcocystidae): ultrastructural description and its new host record, the Alaskan wolf (Canis lupus)	PARASITOLOGY RESEARCH	115	7	2893	2897	10.1007/s00436-016-5067-5	Sarcocystis sarcocysts are common in muscles of herbivores but are rare in muscles of carnivores. Here, we report sarcocysts in the muscles of a gray wolf (Canis lupus) from Alaska, USA, for the first time. Sarcocysts extracted from the tongue of the wolf were up to 900 mu m long and slender and appeared to have a relatively thin wall by light microscope. By transmission electron microscopy, the …
361	exclude_title	exclude_title		EK	KH		exclude_title				WoS_Scopus											Campbell, K; Mundy, CJ; Landy, JC; Delaforge, A; Michel, C; Rysgaard, S	2016	Community dynamics of bottom-ice algae in Dease Strait of the Canadian Arctic	PROGRESS IN OCEANOGRAPHY	149		27	39	10.1016/j.pocean.2016.10.005	Sea ice algae are a characteristic feature in ice-covered seas, contributing a significant fraction of the total primary production in many areas and providing a concentrated food source of high nutritional value to grazers in the spring. Algae respond to physical changes in the sea ice environment by modifying their cellular carbon, nitrogen and pigment content, and by adjusting their photophysi…
362	exclude_title	exclude_title		EK	KH		exclude_title				WoS_Scopus											Campbell, RG; Ashjian, CJ; Sherr, EB; Sherr, BF; Lomas, MW; Ross, C; Alatalo, P; Gelfman, C; Van Keuren, D	2016	Mesozooplankton grazing during spring sea-ice conditions in the eastern Bering Sea	DEEP-SEA RESEARCH PART II-TOPICAL STUDIES IN OCEANOGRAPHY	134		157	172	10.1016/j.dsr2.2015.11.003	Mesozooplanlcton (copepods and euphausiids) grazing rates and prey preferences were determined during a series of three research cruises to the eastern Bering Sea in spring 2008, 2009, and 2010. Chlorophyll was dominated by large cells ( > 5 mu m), especially at bloom locations where they usually comprised greater than 90% of the total chlorophyll biomass. The relative importance of microzooplank…
363	include	exclude_abstract		EK	KH		exclude_full_text	include 363 i,j,k,l exclude a,b,c,d,e,f,g,h		472	WoS_Scopus	yes	yes	include_site_coordinates, see comments	exclude_full_text	not relevant outcome: focuses on the herbivore (describes patterns of species diversity of chrysomelid beetles on Salix along a broad latitudinal gradient, but does not measure their effects on plants)	no_outcome	ICB	no			Canty, R; Ruzzier, E; Cronk, Q; Percy, D	2016	Salix transect of Europe: patterns in the most abundant chrysomelid beetle (Coleoptera: Chrysomelidae) herbivores of willow from Greece to Arctic Norway	BIODIVERSITY DATA JOURNAL	4				10.3897/BDJ.4.e10194	Background Chrysomelid beetles associated with willow (Salix spp.) were surveyed at 41 sites across Europe, from Greece (lat. 38.8 degrees N) to arctic Norway (lat. 69.7 degrees N). New information In all, 34 willow-associated chrysomelid species were encountered, of which eight were very abundant. The abundant species were: Crepidodera aurata Marsham, 1802 at 27 sites, Phratora vitellinae (Linna…
364	include	include		EK	KH		include			473	WoS_Scopus	yes	yes	include	include			DE	yes			Damgaard, C; Raundrup, K; Aastrup, P; Langen, PL; Feilberg, J; Nabe-Nielsen, J	2016	Arctic resilience: no evidence of vegetation change in response to grazing and climate changes in South Greenland	ARCTIC ANTARCTIC AND ALPINE RESEARCH	48	3	531	549	10.1657/AAAR0016-005	Recent studies suggest that climate changes may have a strong impact on the vegetation composition in Arctic ecosystems, causing increasing dominance of woody species. Evidence from short-term studies on the effects of herbivory indicates that this effect may be counteracted by grazing, but it has not yet been studied whether the effect is persistent and general. Here, we present the results from…
365	include	include		EK	KH		exclude_full_text				WoS_Scopus	yes	yes	include	exclude_full_text	fertilization experiment, consequences to herbivores only discussed	no_comparator	MV, OG	no			De Long, JR; Sundqvist, MK; Gundale, MJ; Giesler, R; Wardle, DA	2016	Effects of elevation and nitrogen and phosphorus fertilization on plant defence compounds in subarctic tundra heath vegetation	FUNCTIONAL ECOLOGY	30	2	314	325	10.1111/1365-2435.12493	Plant chemical and structural defence compounds are well known to impact upon herbivory of fresh leaves and influence decomposition rates after leaf senescence. A number of theories predict that alleviating nutrient limitation and reducing other environmental stressors will result in decreased production of plant chemical defences. In this study, we measured plant defence properties [total polyph…
366	include	include		EK	KH		remove_duplicate			483	WoS_Scopus											den Herder, M; Helle, S; Niemela, P; Henttonen, H; Helle, T	2016	Large herbivore grazing limits small-mammal densities in Finnish Lapland	ANNALES ZOOLOGICI FENNICI	53	2019-04-03	154	164		Grazing by large mammals can affect small-mammal populations by modifying the ground-layer vegetation, which provides them with food and shelter. The aim of this study was to investigate the impact of semi-domesticated reindeer grazing on small-mammal abundance in boreal forests/subarctic tundra ecosystems in a large-scale exclosure experiment in northernmost Finnish Lapland. In our experiment sp…
367	exclude_title	exclude_title		EK	KH		exclude_title				WoS_Scopus											Deshpande, BN; Crevecoeur, S; Matveev, A; Vincent, WF	2016	Bacterial production in subarctic peatland lakes enriched by thawing permafrost	BIOGEOSCIENCES	13	15	4411	4427	10.5194/bg-13-4411-2016	Peatlands extend over vast areas of the northern landscape. Within some of these areas, lakes and ponds are changing in size as a result of permafrost thawing and erosion, resulting in mobilization of the carbon-rich peatland soils. Our aims in the present study were to characterize the particle, carbon and nutrient regime of a set of thermokarst (thaw) lakes and their adjacent peatland permafros…
368	exclude_title	exclude_abstract		EK	KH		exclude_abstract				WoS_Scopus											Dial, RJ; Smeltz, TS; Sullivan, PF; Rinas, CL; Timm, K; Geck, JE; Tobin, SC; Golden, TS; Berg, EC	2016	Shrubline but not treeline advance matches climate velocity in montane ecosystems of south-central Alaska	GLOBAL CHANGE BIOLOGY	22	5	1841	1856	10.1111/gcb.13207	Tall shrubs and trees are advancing into many tundra and wetland ecosystems but at a rate that often falls short of that predicted due to climate change. For forest, tall shrub, and tundra ecosystems in two pristine mountain ranges of Alaska, we apply a Bayesian, error-propagated calculation of expected elevational rise (climate velocity), observed rise (biotic velocity), and their difference (bi…
369	exclude_title	exclude_abstract		EK	KH		exclude_abstract				WoS_Scopus											Douhard, M; Loe, LE; Stien, A; Bonenfant, C; Irvine, RJ; Veiberg, V; Ropstad, E; Albon, S	2016	The influence of weather conditions during gestation on life histories in a wild Arctic ungulate	PROCEEDINGS OF THE ROYAL SOCIETY B-BIOLOGICAL SCIENCES	283	1841			10.1098/rspb.2016.1760	The internal predictive adaptive response (internal PAR) hypothesis predicts that individuals born in poor conditions should start to reproduce earlier if they are likely to have reduced performance in later life. However, whether this is the case remains unexplored in wild populations. Here, we use longitudinal data from a long-term study of Svalbard reindeer to examine age-related changes in ad…
370	exclude_title	exclude_title		EK	KH		exclude_title				WoS_Scopus											Eri, K; Kudo, I	2016	Significant contribution of lytic mortality to bacterial production and DOC cycles in Funka Bay, Japan	JOURNAL OF OCEANOGRAPHY	72	2	177	187	10.1007/s10872-015-0316-2	A modified dilution experiment was conducted to evaluate the relative contribution of viral lysis and protozoan grazing to the mortalities of heterotrophic bacteria in Funka Bay, a subarctic coastal bay. The experiment included the stepwise dilution of the original seawater with virus-free seawater (10 kDa ultrafiltered) to change the encounter rate of both virus and protozoa to heterotrophic bac…
371	include	include		EK	KH		include				WoS_Scopus	yes	yes	include	include			MV, OG	yes			Eskelinen, A; Saccone, P; Spasojevic, MJ; Virtanen, R	2016	Herbivory mediates the long-term shift in the relative importance of microsite and propagule limitation	JOURNAL OF ECOLOGY	104	5	1326	1334	10.1111/1365-2745.12592	Microsite and propagule limitation are predicted to jointly influence plant community assembly and diversity, with shifts in their relative contributions under different ecological conditions. Mammalian herbivory can also exhibit strong impact on community assembly and diversity. However, to date few studies have considered how herbivory might interact with propagule and microsite limitation and …
372	exclude_title	exclude_title		EK	KH		exclude_title				WoS_Scopus											Evenset, A; Hallanger, IG; Tessmann, M; Warner, N; Ruus, A; Borga, K; Gabrielsen, GW; Christensen, G; Renaud, PE	2016	Seasonal variation in accumulation of persistent organic pollutants in an Arctic marine benthic food web	SCIENCE OF THE TOTAL ENVIRONMENT	542		108	120	10.1016/j.scitotenv.2015.10.092	The aim of the present study was to investigate seasonal variation in persistent organic pollutant (POP) concentrations, as well as food-web biomagnification, in an Arctic, benthic marine community. Macrozoobenthos, demersal fish and common eiders were collected both inside and outside of Kongsfjorden, Svalbard, during May, July and October 2007. The samples were analysed for a selection of legac…
373	exclude_title	exclude_title		EK	KH		exclude_title			477	WoS_Scopus											Fiorillo, AR; McCarthy, PJ; Flaig, PP	2016	A multi-disciplinary perspective on habitat preferences among dinosaurs in a Cretaceous Arctic greenhouse world, North Slope, Alaska (Prince Creek Formation: lower Maastrichtian)	PALAEOGEOGRAPHY PALAEOCLIMATOLOGY PALAEOECOLOGY	441		377	389	10.1016/j.palaeo.2015.07.024	The Prince Creek Formation of northern Alaska is the most abundant source of polar dinosaur remains in the world, and now, corroborating data from this well-studied rock unit allow for making inferences about the paleoecological preferences for these extinct polar animals. The rock unit records high-latitude, alluvial sedimentation and soil formation on a low-gradient, muddy coastal plain. Compou…
374	exclude_abstract	exclude_abstract		EK	KH		exclude_abstract				WoS_Scopus											Fokkema, W; de Boer, W; van der Jeugd, HP; Dokter, A; Nolet, BA; De Kok, LJ; Elzenga, JTM; Olff, H	2016	The nature of plant adaptations to salinity stress has trophic consequences	OIKOS	125	6	804	811	10.1111/oik.02757	In different ecosystems herbivores highly prefer particular plant species. This is often explained in a stoichiometric framework of nutrient-based plant adaptations to herbivory. We hypothesize that such super-palatability can also arise as an evolutionary by-product of osmoregulatory adaptations of plants to stressful environmental conditions, as salinity, drought and cold. Here, we investigate …
375	exclude_title	exclude_title		EK	KH		exclude_title				WoS_Scopus											Franson, JC; Flint, PL; Schmutz, JA	2016	Blood selenium concentrations in female Pacific black brant molting in Arctic Alaska: Relationships with age and habitat salinity	MARINE POLLUTION BULLETIN	111	2019-02-01	453	455	10.1016/j.marpolbul.2016.06.110	Blood samples collected from 81 female Pacific black brant (Branta bernicla nigricans) molting near Teshekpuk Lake, Alaska, were analyzed for selenium concentration. The concentration of selenium in blood of after second year (hatched two or more years ago) females (0.84 mu g/g wet weight) was significantly greater than the concentration in second year (hatched the previous year) females (0.61 mu…
376	exclude_title	exclude_title		EK	KH		exclude_title			478	WoS_Scopus											Gao, QZ; Schwartz, MW; Zhu, WQ; Wan, YF; Qin, XB; Ma, X; Liu, S; Williamson, MA; Peters, CB; Li, Y	2016	Changes in Global Grassland Productivity during 1982 to 2011 Attributable to Climatic Factors	REMOTE SENSING	8	5			10.3390/rs8050384	Open, Grass-and Forb-Dominated (OGFD) ecosystems, including tundra, tropical grasslands and savanna, provide habitat for both wild and domesticated large ungulate herbivores. These ecosystems exist across a wide temperature gradient from the Arctic regions to the Equator, but are confined to a narrow set of moisture conditions that range from arid deserts to forest-dominated systems. Primary prod…
377	exclude_title	exclude_title		EK	KH		exclude_title			479	WoS_Scopus											Garcia-Gonzalez, R; Aldezabal, A; Laskurain, NA; Margalida, A; Novoa, C	2016	Factors Affecting Diet Variation in the Pyrenean Rock Ptarmigan (Lagopus muta pyrenaica): Conservation Implications	PLOS ONE	11	2			10.1371/journal.pone.0148614	The Pyrenean rock ptarmigan (Lagopus muta pyrenaica) lives at one of the southernmost limits of the ptarmigan range. Their small population sizes and the impacts of global changes are limiting factors in the conservation of this threatened subspecies. An effective conservation policy requires precise basic knowledge of a species' food and habitat requirements, information that is practically non-…
378	exclude_title	exclude_title		EK	KH		exclude_title			480	WoS_Scopus											Gharajehdaghipour, T; Roth, JD; Fafard, PM; Markham, JH	2016	Arctic foxes as ecosystem engineers: increased soil nutrients lead to increased plant productivity on fox dens	SCIENTIFIC REPORTS	6				10.1038/srep24020	Top predators can provide fundamental ecosystem services such as nutrient cycling, and their impact can be even greater in environments with low nutrients and productivity, such as Arctic tundra. We estimated the effects of Arctic fox (Vulpes lagopus) denning on soil nutrient dynamics and vegetation production near Churchill, Manitoba in June and August 2014. Soils from fox dens contained higher …
379	exclude_title	include		EK	KH		exclude_full_text				WoS_Scopus	yes	yes	include	exclude_full_text	not relevant exposure: review of studies manipulating nutrient availability; although they discuss the consequences to herbivores, they do not measure effects of herbivory directly	no_exposure	ICB	no			Gough, L; Bettez, ND; Slavik, KA; Bowden, WB; Giblin, AE; Kling, GW; Laundre, JA; Shaver, GR	2016	Effects of long-term nutrient additions on Arctic tundra, stream, and lake ecosystems: beyond NPP	OECOLOGIA	182	3	653	665	10.1007/s00442-016-3716-0	Primary producers form the base of food webs but also affect other ecosystem characteristics, such as habitat structure, light availability, and microclimate. Here, we examine changes caused by 5-30+ years of nutrient addition and resulting increases in net primary productivity (NPP) in tundra, streams, and lakes in northern Alaska. The Arctic provides an important opportunity to examine how ecos…
380	include	exclude_abstract		EK	KH		include				WoS_Scopus	yes	yes	include	include			AK, ICB	yes			Greyson-Gaito, CJ; Barbour, MA; Rodriguez-Cabal, MA; Crutsinger, GM; Henry, GHR	2016	Freedom to move: Arctic caterpillar (Lepidoptera) growth rate increases with access to new willows (Salicaceae)	CANADIAN ENTOMOLOGIST	148	6	673	682	10.4039/tce.2016.22	Movement between host plants during the growing season is a common behaviour among insect herbivores, although the mechanisms promoting these movements are poorly understood for many systems. Two possible reasons why insect herbivores relocate include compensating for host plant quantity and/or quality changes and the avoidance of natural enemies. The Arctic caterpillar (Gynaephora groenlandica (…
381	exclude_title	exclude_title		EK	KH		exclude_title				WoS_Scopus											Gutierrez-Rodriguez, A; Selph, KE; Landry, MR	2016	Phytoplankton growth and microzooplankton grazing dynamics across vertical environmental gradients determined by transplant in situ dilution experiments	JOURNAL OF PLANKTON RESEARCH	38	2	271	289	10.1093/plankt/fbv074	The Costa Rica Dome (CRD) represents a classic case of the bloom-forming capacity of small phytoplankton. Unlike other upwelling systems, autotrophic biomass in the CRD is dominated by picocyanobacteria and small eukaryotes that outcompete larger diatoms and reach extremely high biomass levels. We investigated responses of the subsurface phytoplankton community of the CRD to changes associated wi…
382	include	exclude_abstract		EK	KH		exclude_full_text				WoS_Scopus	yes	no	NA	exclude_full_text	concept/meta-analysis paper	no_outcome_data	JM	no			He, Q; Silliman, BR	2016	Consumer control as a common driver of coastal vegetation worldwide	ECOLOGICAL MONOGRAPHS	86	3	278	294	10.1002/ecm.1221/suppinfo	Rapid, global, anthropogenic alteration of food webs in ecosystems necessitates a better understanding of how consumers regulate natural communities. We provide a global synthesis of consumer control of vegetation in coastal wetlands, where the domineering role of physical factors such as nutrient and salinity, rather than consumers, has been emphasized for decades. Using a data set of 1748 measu…
383	exclude_abstract	exclude_abstract		EK	KH		exclude_abstract				WoS_Scopus											Hejcman, M; Hejcmanova, P; Pavlu, V; Thorhallsdottir, AG	2016	Forage quality of leaf fodder from the main woody species in Iceland and its potential use for livestock in the past and present	GRASS AND FORAGE SCIENCE	71	4	649	658	10.1111/gfs.12224	Woody species played, and in many Nordic regions still play, a very important role in livestock feeding. However, forage quality (contents of macroelements and fibre fractions) of the leaves of common woody species is often inadequate. The aim of our study was to determine forage quality of leaves of Betula nana, Betula pubescens, Salix lanata, Salix phylicifolia and Sorbus aucuparia from Iceland…
384	exclude_title	exclude_title		EK	KH		exclude_title				WoS_Scopus											Hildebrandt, N; Sartoris, FJ; Schulz, KG; Riebesell, U; Niehoff, B	2016	Ocean acidification does not alter grazing in the calanoid copepods Calanus finmarchicus and Calanus glacialis	ICES JOURNAL OF MARINE SCIENCE	73	3	927	936	10.1093/icesjms/fsv226	It is currently under debate whether organisms that regulate their acid base status under environmental hypercapnia demand additional energy. This could impair animal fitness, but might be compensated for via increased ingestion rates when food is available. No data are yet available for dominant Calanus spp. from boreal and Arctic waters. To fill this gap, we incubated Calanus glacialis at 390, …
385	exclude_title	exclude_title		EK	KH		exclude_title				WoS_Scopus											Holub, B; Lanczont, M; Madeyska, T	2016	EXAMPLES OF LANDSCAPE RECONSTRUCTIONS NEAR THE EASTERN RANGE OF THE MAGDALENIAN OCCUPATION (SE POLAND) BASED ON GIS ANALYSIS	ANTHROPOLOGIE-INTERNATIONAL JOURNAL OF HUMAN DIVERSITY AND EVOLUTION	54	3	205	230		SE Poland - the Carpathian foreland and the northern part of the Carpathian Mountains - is a marginal, easternmost part of the area settled by Magdalenian people. Several sites of this culture were investigated in this area by archaeologists and naturalists during the last decades. Based on the results of those studies, landscape of the surroundings of three Magdalenian camps (within direct penet…
386	exclude_title	exclude_title		EK	KH		exclude_title			485	WoS_Scopus											Honda, MC; Kawakami, H; Matsumoto, K; Wakita, M; Fujiki, T; Mino, Y; Sukigara, C; Kobari, T; Uchimiya, M; Kaneko, R; Saino, T	2016	Comparison of sinking particles in the upper 200 m between subarctic station K2 and subtropical station S1 based on drifting sediment trap experiments	JOURNAL OF OCEANOGRAPHY	72	3	373	386	10.1007/s10872-015-0280-x	Drifting sediment trap experiments were conducted during various seasons to elucidate the characteristics of particles sinking through the upper 200 m of the water column in the western Pacific at subarctic station K2 and subtropical station S1. The sinking particle flux increased when primary productivity was high at each station, during June-July at K2 and during February at S1. Biogenic opal (…
387	exclude_title	exclude_title		EK	KH		exclude_title			486	WoS_Scopus											Jalkanen, R	2016	Synthesis and New Observations on Needle Pathogens of Larch in Northern Finland	FORESTS	7	1			10.3390/f7010025	Needle pathogens of larch (Larix spp.) in the Nordic countries are under-studied. Their incidence in Finland tends to be low and local, and this may be a function of enemy release, since species of larch were introduced to the region. Here, the ecology and incidence of larch needle pathogens and the abiotic factors that also affect larch in northern Finland are reviewed. Field observations and re…
388	exclude_title	exclude_title		EK	KH		exclude_title				WoS_Scopus											Kasumyan, AO	2016	Taste attractiveness of free amino acids and their physicochemical and biological properties (as exemplified by fishes)	JOURNAL OF EVOLUTIONARY BIOCHEMISTRY AND PHYSIOLOGY	52	4	271	281	10.1134/S0022093016040013	Using fishes (32 species, 11 families) as an example, the relationship between the taste attractiveness of free amino acids (L-isomers) and their physicochemical and biological properties was analyzed. It was shown that essential amino acids, most nutritionally required for an organism, have lower taste attractiveness for fishes than nonessential amino acids. Only in 6 of the 32 tested species (s…
389	include	exclude_abstract		EK	KH		exclude_full_text	not herbivory effects on plants			WoS_Scopus	yes	yes	include	exclude_full_text	no herbivory effects on plants	no_outcome	JM	no			Kelsey, KC; Leffler, AJ; Beard, KH; Schmutz, JA; Choi, RT; Welker, JM	2016	Interactions among vegetation, climate, and herbivory control greenhouse gas fluxes in a subarctic coastal wetland	JOURNAL OF GEOPHYSICAL RESEARCH-BIOGEOSCIENCES	121	12	2960	2975	10.1002/2016JG003546	High-latitude ecosystems are experiencing the most rapid climate changes globally, and in many areas these changes are concurrent with shifts in patterns of herbivory. Individually, climate and herbivory are known to influence biosphere-atmosphere greenhouse gas (GHG) exchange; however, the interactive effects of climate and herbivory in driving GHG fluxes have been poorly quantified, especially …
390	exclude_title	exclude_abstract		EK	KH		exclude_abstract				WoS_Scopus											Kerfahi, D; Tripathi, BM; Porazinska, DL; Park, J; Go, R; Adams, JM	2016	Do tropical rain forest soils have greater nematode diversity than High Arctic tundra? A metagenetic comparison of Malaysia and Svalbard	GLOBAL ECOLOGY AND BIOGEOGRAPHY	25	6	716	728	10.1111/geb.12448	Aim Latitudinal differences in diversity have long fascinated ecologists. It is unclear whether small soil animals such as nematodes show latitudinal differences in diversity. Based on hypotheses concerning the basis for greater tropical diversity, and by analogy with other groups, we predicted (1) greater alpha diversity in the equatorial tropics than the High Arctic, (2) greater beta and gamma …
391	exclude_title	exclude_title		EK	KH		exclude_title				WoS_Scopus											Kiedrowicz, A; Rector, BG; Zawierucha, K; Szydlo, W; Skoracka, A	2016	Phytophagous mites (Acari: Eriophyoidea) recorded from Svalbard, including the description of a new species	POLAR BIOLOGY	39	8	1359	1368	10.1007/s00300-015-1858-x	Eriophyoid mites (Eriophyoidea) are minute phytophagous mites with great economic importance and great invasive potential. In spite of their demonstrated impact on ecosystem functions, knowledge of eriophyoid mite fauna in the Arctic is lacking. To date, only eight eriophyoid mite species have been recorded from the entire region north of the Arctic Circle. The Svalbard archipelago is one of the …
392	exclude_title	exclude_title		EK	KH		exclude_title				WoS_Scopus											Klodd, AE; Nippert, JB; Ratajczak, Z; Waring, H; Phoenix, GK	2016	Tight coupling of leaf area index to canopy nitrogen and phosphorus across heterogeneous tallgrass prairie communities	OECOLOGIA	182	3	889	898	10.1007/s00442-016-3713-3	Nitrogen (N) and phosphorus (P) are limiting nutrients for many plant communities worldwide. Foliar N and P along with leaf area are among the most important controls on photosynthesis and hence productivity. However, foliar N and P are typically assessed as species level traits, whereas productivity is often measured at the community scale. Here, we compared the community-level traits of leaf ar…
393	exclude_title	exclude_title		EK	KH		exclude_title			487	WoS_Scopus											Kopylov, AI; Sazhin, AF; Zabotkina, EA; Romanenko, AV; Romanova, ND; Makarevich, PR; Wenger, MP	2016	Viruses, Bacteria, and Heterotrophic Nanoflagellates in Laptev Sea Plankton	OCEANOLOGY	56	6	789	798	10.1134/S0001437016050052	The paper considers the concentrations and functional characteristics of viruses, bacteria, and heterotrophic nanoflagellates determined for the first time in the Laptev Sea in August-September, 2014. The abundance of bacteria, viruses, and heterotrophic nanoflagellates varied from 110.1 x 10(3) to 828.4 x 103 cells/mL, from 384.2 x 10(3) to 2932.8 x 10(3) particles/mL, and from 108 to 651 cells/…
394	exclude_title	exclude_title		EK	KH		exclude_title				WoS_Scopus											Kosobokova, KN; Hirche, HJ	2016	A seasonal comparison of zooplankton communities in the Kara Sea - With special emphasis on overwintering traits	ESTUARINE COASTAL AND SHELF SCIENCE	175		146	156	10.1016/j.ecss.2016.03.030	Siberian marginal seas cover large parts of the marine Arctic and host unique zooplankton communities. Detailed knowledge of their community structure and life history traits is a prerequisite to predict their response to ongoing and future climate and anthropogenic changes although winter data is extremely rare. Here data are presented from winter samples (February and April) in four biogeograph…
395	exclude_title	exclude_abstract		EK	KH		exclude_abstract				WoS_Scopus											Kozlov, MV; Skoracka, A; Zverev, V; Lewandowski, M; Zvereva, EL	2016	Two Birch Species Demonstrate Opposite Latitudinal Patterns in Infestation by Gall-Making Mites in Northern Europe	PLOS ONE	11	11			10.1371/journal.pone.0166641	Latitudinal patterns in herbivory, i.e. variations in plant losses to animals with latitude, are generally explained by temperature gradients. However, earlier studies suggest that geographical variation in abundance and diversity of gall-makers may be driven by precipitation rather than by temperature. To test the above hypothesis, we examined communities of eriophyoid mites (Acari: Eriophyoidea…
396	exclude_title	exclude_title		EK	KH		exclude_title				WoS_Scopus											Lalande, C; Moriceau, B; Leynaert, A; Morata, N	2016	Spatial and temporal variability in export fluxes of biogenic matter in Kongsfjorden	POLAR BIOLOGY	39	10	1725	1738	10.1007/s00300-016-1903-4	The marine ecosystem of Kongsfjorden experiences large variations in primary productivity due to pronounced seasonal variations in sunlight, glacier melt, and ice cover. The objective of this study was to assess spatial and seasonal variability in the downward export of biogenic matter in Kongsfjorden. Short-term sediment traps were deployed for periods ranging from 21 to 52 h at three stations f…
397	exclude_title	exclude_title		EK	KH		exclude_title				WoS_Scopus											Le Moigne, FAC; Henson, SA; Cavan, E; Georges, C; Pabortsava, K; Achterberg, EP; Ceballos-Romero, E; Zubkov, M; Sanders, RJ	2016	What causes the inverse relationship between primary production and export efficiency in the Southern Ocean?	GEOPHYSICAL RESEARCH LETTERS	43	9	4457	4466	10.1002/2016GL068480	The ocean contributes to regulating atmospheric CO2 levels, partly via variability in the fraction of primary production (PP) which is exported out of the surface layer (i.e., the e ratio). Southern Ocean studies have found that contrary to global-scale analyses, an inverse relationship exists between e ratio and PP. This relationship remains unexplained, with potential hypotheses being (i) large…
398	exclude_title	exclude_title		EK	KH		exclude_title				WoS_Scopus											Lee, YJ; Matrai, PA; Friedrichs, MAM; Saba, VS; Aumont, O; Babin, M; Buitenhuis, ET; Chevallier, M; de Mora, L; Dessert, M; Dunne, JP; Ellingsen, IH; Feldman, D; Frouin, R; Gehlen, M; Gorgues, T; Ilyina, T; Jin, MB; John, JG; Lawrence, J; Manizza, M; Menkes, CE; Perruche, C; Le Fouest, V; Popova, EE; Romanou, A; Samuelsen, A; Schwinger, J; Seferian, R; Stock, CA; Tjiputra, J; Tremblay, B; Ueyoshi…	2016	Net primary productivity estimates and environmental variables in the Arctic Ocean: An assessment of coupled physical-biogeochemical models	JOURNAL OF GEOPHYSICAL RESEARCH-OCEANS	121	12	8635	8669	10.1002/2016JC011993	The relative skill of 21 regional and global biogeochemical models was assessed in terms of how well the models reproduced observed net primary productivity (NPP) and environmental variables such as nitrate concentration (NO3), mixed layer depth (MLD), euphotic layer depth (Z(eu)), and sea ice concentration, by comparing results against a newly updated, quality-controlled in situ NPP database for…
399	exclude_title	exclude_title		EK	KH		exclude_title				WoS_Scopus											Li, KZ; Doubleday, AJ; Galbraith, MD; Hoperoft, RR	2016	High abundance of salps in the coastal Gulf of Alaska during 2011: A first record of bloom occurrence for the northern Gulf	DEEP-SEA RESEARCH PART II-TOPICAL STUDIES IN OCEANOGRAPHY	132		136	145	10.1016/j.dsr2.2016.04.009	Atypical high abundances of two salp species occurred in the coastal Gulf of Alaska during 2011. Salpa aspera dominated numerically in aggregate form during spring, and became uncommon during summer, while Cyclosalpa bakeri increased from low during spring to high abundance during summer. Both species were absent, or nearly so, by fall. C. bakeri abundance was positively correlated to surface tem…
400	exclude_title	exclude_title		EK	KH		exclude_title				WoS_Scopus											Li, YM; Lin, QY; Wang, SP; Li, XZ; Liu, WT; Luo, CY; Zhang, ZH; Zhu, XX; Jiang, LL; Li, XN	2016	Soil bacterial community responses to warming and grazing in a Tibetan alpine meadow	FEMS MICROBIOLOGY ECOLOGY	92	1			10.1093/femsec/fiv152	Warming and grazing significantly affect the structure and function of an alpine meadow ecosystem. Yet, the responses of soil microbes to these disturbances are not well understood. Controlled asymmetrical warming (+1.2/1.7 degrees C during daytime/nighttime) with grazing experiments were conducted to study microbial response to warming, grazing and their interactions. Significant interactive eff…
401	exclude_title	exclude_abstract		EK	KH		exclude_abstract				WoS_Scopus											Little, CJ; Wheeler, JA; Sedlacek, J; Cortes, AJ; Rixen, C	2016	Small-scale drivers: the importance of nutrient availability and snowmelt timing on performance of the alpine shrub Salix herbacea	OECOLOGIA	180	4	1015	1024	10.1007/s00442-015-3394-3	Alpine plant communities are predicted to face range shifts and possibly extinctions with climate change. Fine-scale environmental variation such as nutrient availability or snowmelt timing may contribute to the ability of plant species to persist locally; however, variation in nutrient availability in alpine landscapes is largely unmeasured. On three mountains around Davos, Switzerland, we deplo…
402	exclude_title	exclude_title		EK	KH		exclude_title				WoS_Scopus											Liu, HS; Miao, ZW	2016	Responses of above- and below-ground carbon stocks to environmental drivers in Tibetan Alpine grasslands	JOURNAL OF ENVIRONMENTAL ENGINEERING AND LANDSCAPE MANAGEMENT	24	1	1	9	10.3846/16486897.2015.1071709	Paucity in the knowledge of responses of grassland carbon dynamics to environmental variables constrains our ability to predict future ecosystem productivity. The aim of this study was to investigate differential responses of above- and below-ground carbon stocks to environmental drivers in Tibetan alpine Plateau at both regional and local scales. Variance partitioning and non-linear regression b…
403	exclude_abstract	exclude_abstract		EK	KH		exclude_abstract				WoS_Scopus											Loe, LE; Hansen, BB; Stien, A; Albon, SD; Bischof, R; Carlsson, A; Irvine, RJ; Meland, M; Rivrud, IM; Ropstad, E; Veiberg, V; Mysterud, A	2016	Behavioral buffering of extreme weather events in a high-Arctic herbivore	ECOSPHERE	7	6			10.1002/ecs2.1374	As global warming advances, there is a growing concern about the impact of extreme weather events on ecosystems. In the Arctic, more frequent unseasonal warm spells and rain-on-snow events in winter cause changes in snow-pack properties, including ground icing. Such extreme weather events are known to have severe effects across trophic levels, for instance, causing die-offs of large herbivores. H…
404	exclude_title	exclude_title		EK	KH		exclude_title				WoS_Scopus											Mannisto, M; Ganzert, L; Tiirola, M; Haggblom, MM; Stark, S	2016	Do shifts in life strategies explain microbial community responses to increasing nitrogen in tundra soil?	SOIL BIOLOGY & BIOCHEMISTRY	96		216	228	10.1016/j.soilbio.2016.02.012	Subarctic tundra soils store large quantities of the global organic carbon (C) pool as the decomposition of plant litter and soil organic matter is limited by low temperatures and limiting nutrients. Mechanisms that drive organic matter decomposition are still poorly understood due to our limited knowledge of microbial communities and their responses to changing conditions. In subarctic tundra la…
405	exclude_title	exclude_title		EK	KH		exclude_title				WoS_Scopus											Meunier, CL; Gundale, MJ; Sanchez, IS; Liess, A	2016	Impact of nitrogen deposition on forest and lake food webs in nitrogen-limited environments	GLOBAL CHANGE BIOLOGY	22	1	164	179	10.1111/gcb.12967	Increased reactive nitrogen (N-r) deposition has raised the amount of N available to organisms and has greatly altered the transfer of energy through food webs, with major consequences for trophic dynamics. The aim of this review was to: (i) clarify the direct and indirect effects of N-r deposition on forest and lake food webs in N-limited biomes, (ii) compare and contrast how aquatic and terrest…
406	exclude_abstract	exclude_title		EK	KH		exclude_abstract				WoS_Scopus											Miles, VV; Esau, I	2016	Spatial heterogeneity of greening and browning between and within bioclimatic zones in northern West Siberia	ENVIRONMENTAL RESEARCH LETTERS	11	11			10.1088/1748-9326/11/11/115002	Studies of the normalized difference vegetation index (NDVI) have found broad changes in vegetation productivity in high northern latitudes in the past decades, including increases in NDVI ('greening') in tundra regions and decreases ('browning') in forest regions. The causes of these changes are not well understood but have been attributed to a variety of factors. We use Moderate Resolution Imag…
407	exclude_title	exclude_abstract		EK	KH		exclude_abstract				WoS_Scopus											Mino, Y; Sukigara, C; Honda, MC; Kawakami, H; Matsumoto, K; Wakita, M; Kitamura, M; Fujiki, T; Sasaoka, K; Abe, O; Kaiser, J; Saino, T	2016	Seasonal variations in the nitrogen isotopic composition of settling particles at station K2 in the western subarctic North Pacific	JOURNAL OF OCEANOGRAPHY	72	6	819	836	10.1007/s10872-016-0381-1	Intensive observations using hydrographical cruises and moored sediment trap deployments during 2010 and 2012 at station K2 in the North Pacific Western Subarctic Gyre (WSG) revealed seasonal changes in delta N-15 of both suspended and settling particles. Suspended particles (SUS) were collected from depths between the surface and 200 m; settling particles by drifting sediment traps (DST; 100-200…
408	include	include		EK	KH		include			490	WoS_Scopus	yes	yes	include	include			JF, MS	yes			Mosbacher, JB; Kristensen, DK; Michelsen, A; Stelvig, M; Schmidt, NM	2016	Quantifying muskox plant biomass removal and spatial relocation of nitrogen in a high arctic tundra ecosystem	ARCTIC ANTARCTIC AND ALPINE RESEARCH	48	2	229	240	10.1657/AAAR0015-034	The muskox (Ovibos moschatus), a key species in the arctic tundra, is the only large bodied herbivore in Northeast Greenland. Here, we quantify the biomass removal and fecal deposition by muskoxen during the snow-free period in the years 1996 to 2013 in the high arctic tundra ecosystem at Zackenberg, Northeast Greenland.We show that despite high densities, muskoxen removed only 0.17% and 0.04% of…
409	exclude_title	exclude_abstract		EK	KH		exclude_abstract				WoS_Scopus											Mosbacher, JB; Michelsen, A; Stelvig, M; Hendrichsen, DK; Schmidt, NM	2016	Show Me Your Rump Hair and I Will Tell You What You Ate - The Dietary History of Muskoxen (Ovibos moschatus) Revealed by Sequential Stable Isotope Analysis of Guard Hairs	PLOS ONE	11	4			10.1371/journal.pone.0152874	The nutritional state of animals is tightly linked to the ambient environment, and for northern ungulates the state strongly influences vital population demographics, such as pregnancy rates. Continuously growing tissues, such as hair, can be viewed as dietary records of animals over longer temporal scales. Using sequential data on nitrogen stable isotopes (delta N-15) in muskox guard hairs from …
410	exclude_title	exclude_title		EK	KH		exclude_title				WoS_Scopus											Nichols, RV; Akesson, M; Kjellander, P	2016	Diet Assessment Based on Rumen Contents: A Comparison between DNA Metabarcoding and Macroscopy	PLOS ONE	11	6			10.1371/journal.pone.0157977	Dietary choices are central to our understanding of ecology and evolution. Still, many aspects of food choice have been hampered by time consuming procedures and methodological problems. Faster and cheaper methods, such as DNA metabarcoding, have therefore been widely adopted. However, there is still very little empirical support that this new method is better and more accurate compared to the cl…
411	exclude_title	include		EK	KH		include	include 411a,b,c,d exclude 411e,f			WoS_Scopus	yes	yes	include_site_coordinates, see comments	include			ICB	yes			Pape, R; Loffler, J	2016	Spatial patterns of alpine phytomass, primary productivity, and related calorific resources	ECOSPHERE	7	6			10.1002/ecs2.1347	There is an obvious need for a better understanding of the drivers of local spatial heterogeneity in alpine phytomass. Facing challenges in scaling relations with data available either at biome-scale or at plot-scale we wanted to disentangle the driving forces behind spatial patterns of phytomass, productivity, and energy content in alpine reindeer pastures. Our hypothesis was that we would find …
412	exclude_title	exclude_title		EK	KH		exclude_title			493	WoS_Scopus											Parsa, A; Smith, D	2016	Remote Sensing of Sea Ice Using Co- and Cross-Polarization Measurements with Shipborne Radar	INTERNATIONAL JOURNAL OF OFFSHORE AND POLAR ENGINEERING	26	4	321	326	10.17736/ijope.2016.aj06	The ability of cross-polarized X-band radar to differentiate different ice states, including new ice, nilas, young ice (including grey ice and grey-white ice), and thin first-year ice, is investigated. Cross-polarized X-band radar is employed on the Canadian Coast Guard Ship (CCGS) Henry Larsen, which is capable of measuring the depolarization characteristics of sea ice. The CCGS Henry Larsen rec…
413	exclude_abstract	exclude_title		EK	KH		exclude_abstract				WoS_Scopus											Perreault, N; Levesque, E; Fortier, D; Lamarque, LJ	2016	Thermo-erosion gullies boost the transition from wet to mesic tundra vegetation	BIOGEOSCIENCES	13	4	1237	1253	10.5194/bg-13-1237-2016	Continuous permafrost zones with well-developed polygonal ice-wedge networks are particularly vulnerable to climate change. Thermo-mechanical erosion can initiate the development of gullies that lead to substantial drainage of adjacent wet habitats. How vegetation responds to this particular disturbance is currently unknown but has the potential to significantly disrupt function and structure of …
414	exclude_title	exclude_title		EK	KH		exclude_title				WoS_Scopus											Pilfold, NW; Hedman, D; Stirling, I; Derocher, AE; Lunn, NJ; Richardson, E	2016	Mass Loss Rates of Fasting Polar Bears	PHYSIOLOGICAL AND BIOCHEMICAL ZOOLOGY	89	5	377	388	10.1086/687988	Polar bears (Ursus maritimus) have adapted to an annual cyclic regime of feeding and fasting, which is extreme in seasonal sea ice regions of the Arctic. As a consequence of climate change, sea ice breakup has become earlier and the duration of the open-water period through which polar bears must rely on fat reserves has increased. To date, there is limited empirical data with which to evaluate t…
415	exclude_abstract	exclude_title		EK	KH		exclude_abstract				WoS_Scopus											Post, E; Kerby, J; Pedersen, C; Steltzer, H	2016	Highly individualistic rates of plant phenological advance associated with arctic sea ice dynamics	BIOLOGY LETTERS	12	12			10.1098/rsbl.2016.0332	We analysed 12 years of species-specific emergence dates of plants at a Low-Arctic site near Kangerlussuaq, Greenland to investigate associations with sea ice dynamics, a potential contributor to local temperature variation in near-coastal tundra. Species displayed highly variable rates of phenological advance, from a maximum of -2.55 +/- 0.17 and -2.93 +/- 0.51 d yr(-1) among a graminoid and for…
416	exclude_title	exclude_title		EK	KH		exclude_title				WoS_Scopus											Pree, B; Kuhlisch, C; Pohnert, G; Sazhin, AF; Jakobsen, HH; Paulsen, ML; Frischer, ME; Stoecker, D; Nejstgaard, JC; Larsen, A	2016	A simple adjustment to test reliability of bacterivory rates derived from the dilution method	LIMNOLOGY AND OCEANOGRAPHY-METHODS	14	2	114	123	10.1002/lom3.10076	Quantification of grazing losses of marine heterotrophic bacteria is critical for understanding nutrient and carbon pathways in aquatic systems. The dilution method is a commonly used experimental approach for quantifying bacterivory. However, valid estimates of grazing rates obtained using this method depend on several methodological assumptions including that the method does not influence speci…
417	exclude_title	exclude_title		EK	KH		exclude_title				WoS_Scopus											Ray, JL; Althammer, J; Skaar, KS; Simonelli, P; Larsen, A; Stoecker, D; Sazhin, A; Ijaz, UZ; Quince, C; Nejstgaard, JC; Frischer, M; Pohnert, G; Troedsson, C	2016	Metabarcoding and metabolome analyses of copepod grazing reveal feeding preference and linkage to metabolite classes in dynamic microbial plankton communities	MOLECULAR ECOLOGY	25	21	5585	5602	10.1111/mec.13844	In order to characterize copepod feeding in relation to microbial plankton community dynamics, we combined metabarcoding and metabolome analyses during a 22-day seawater mesocosm experiment. Nutrient amendment of mesocosms promoted the development of haptophyte (Phaeocystis pouchetii)- and diatom (Skeletonema marinoi)-dominated plankton communities in mesocosms, in which Calanus sp. copepods were…
418	include	exclude_title		EK	KH		exclude_site_text				WoS_Scopus	yes	no	exclude_site_text				JM	no			Renou-Wilson, F; Muller, C; Moser, G; Wilson, D	2016	To graze or not to graze? Four years greenhouse gas balances and vegetation composition from a drained and a rewetted organic soil under grassland	AGRICULTURE ECOSYSTEMS & ENVIRONMENT	222		156	170	10.1016/j.agee.2016.02.011	Nutrient-poor organic soils under maritime grassland are often located in remote wet locations in the landscape. Leaving these soils without drainage maintenance often raise the water table but continuous management (grazing) means they could remain a source of carbon dioxide (CO2) while also turning into a small source of methane (CH4). Due to geographical and socio-economic reasons, removing th…
419	exclude_title	exclude_title		EK	KH		exclude_title				WoS_Scopus											Reuther, JD; Potter, BA; Holmes, CE; Feathers, JK; Lanoe, FB; Kielhofer, J	2016	The Rosa-Keystone Dunes Field: The geoarchaeology and paleoecology of a late Quaternary stabilized dune field in Eastern Beringia	HOLOCENE	26	12	1939	1953	10.1177/0959683616646190	Stabilized sand sheets and dunes hold a remarkable amount of information on paleoenvironmental conditions under which late Quaternary landscapes evolved in northern subarctic regions. We provide the results of a project focused on understanding the development of lowland environments and ecosystems, including dunes and sand sheets, which were critical habitat for early human occupations in subarc…
420	include	include		EK	KH		include			495	WoS_Scopus	yes	yes	include	include			NY	yes			Ricca, MA; Miles, AK; Van Vuren, DH; Eviner, VT	2016	Impacts of introduced Rangifer on ecosystem processes of maritime tundra on subarctic islands	ECOSPHERE	7	3			10.1002/ecs2.1219	Introductions of mammalian herbivores to remote islands without predators provide a natural experiment to ask how temporal and spatial variation in herbivory intensity alter feedbacks between plant and soil processes. We investigated ecosystem effects resulting from introductions of Rangifer tarandus (hereafter "Rangifer") to native mammalian predator- and herbivore-free islands in the Aleutian a…
421	exclude_title	exclude_title		EK	KH		exclude_title				WoS_Scopus											Riis, T; Christoffersen, KS; Baattrup-Pedersen, A	2016	Mosses in High-Arctic lakes: in situ measurements of annual primary production and decomposition	POLAR BIOLOGY	39	3	543	552	10.1007/s00300-015-1806-9	Aquatic mosses are important primary producers in High-Arctic lakes, but little information is available on their contribution to the overall production in these lakes. In order to predict effects of climate change on whole-lake ecosystem characteristics, more knowledge is needed on the role of moss in primary production, the extent of nutrient limitation of moss primary production and whether mo…
422	include	co-author	include	EK	KH	IK	include			497	WoS_Scopus	yes	yes	include	include			ICB	yes			Ruffino, L; Oksanen, T; Hoset, KS; Tuomi, M; Oksanen, L; Korpimaki, E; Bugli, A; Hobson, KA; Johansen, B; Makynen, A	2016	Predator-rodent-plant interactions along a coast-inland gradient in Fennoscandian tundra	ECOGRAPHY	39	9	871	883	10.1111/ecog.01758	Spatial variation in the strength of trophic cascades in arctic tundra has been related to flows of subsidies across ecosystem boundaries. Here, we ask whether the input of marine subsidies in tundra systems would cause spatial variation in the strength of rodent-plant interactions between coastal areas, where predators have access to marine-derived resources, and non-subsidized inland areas of n…
423	exclude_title	exclude_title		EK	KH		exclude_title				WoS_Scopus											Runge, JA; Fields, DM; Thompson, CRS; Shema, SD; Bjelland, RM; Durif, CMF; Skiftesvik, AB; Browman, HI	2016	End of the century CO2 concentrations do not have a negative effect on vital rates of Calanus finmarchicus, an ecologically critical planktonic species in North Atlantic ecosystems	ICES JOURNAL OF MARINE SCIENCE	73	3	937	950	10.1093/icesjms/fsv258	The Subarctic copepod, Calanus finmarchicus, is an ecologically critical foundation species throughout the North Atlantic Ocean. Any change in the abundance and distribution of C. finmarchicus would have profound effects on North Atlantic pelagic ecosystems and the services that they support, particularly on the coastal shelves located at the southern margins of the species' range. We tested the …
424	include	include		EK	KH		include			498	WoS_Scopus	yes	yes	include	include			NY	yes			Saccone, P; Virtanen, R	2016	Extrapolating multi-decadal plant community changes based on medium-term experiments can be risky: evidence from high-latitude tundra	OIKOS	125	1	76	85	10.1111/oik.02399	For most experimental studies the short-term responses to manipulation often differ from the long-term changes in the community composition, dynamics or functioning. Such discrepancy limits the translation of experimental results into key ecological topics such as global environmental change. Here we analyzed plant community dynamics from a 23-year transplant experiment in the Fennoscandian mount…
425	exclude_title	exclude_abstract		EK	KH		exclude_abstract			499	WoS_Scopus											Salgado-Flores, A; Hagen, LH; Ishaq, SL; Zamanzadeh, M; Wright, ADG; Pope, PB; Sundset, MA	2016	Rumen and Cecum Microbiomes in Reindeer (Rangifer tarandus tarandus) Are Changed in Response to a Lichen Diet and May Affect Enteric Methane Emissions	PLOS ONE	11	5			10.1371/journal.pone.0155213	Reindeer (Rangifer tarandus tarandus) are large Holarctic herbivores whose heterogeneous diet has led to the development of a unique gastrointestinal microbiota, essential for the digestion of arctic flora, which may include a large proportion of lichens during winter. Lichens are rich in plant secondary metabolites, which may affect members of the gut microbial consortium, such as the methane-pr…
426	exclude_title	exclude_abstract		EK	KH		exclude_abstract				WoS_Scopus											Santangelo, JS; Kotanen, PM	2016	Nonsystemic fungal endophytes increase survival but reduce tolerance to simulated herbivory in subarctic Festuca rubra	ECOSPHERE	7	5			10.1002/ecs2.1260	Plant-microbial symbioses are widespread in nature and can shape the ecology and evolution of hosts and interacting symbionts. Fungal endophytes-fungi that live asymptomatically within plant tissues-are a pervasive group of symbionts well known for their role in mediating host-responses to biotic and abiotic stresses. However, they also may become pathogenic and often impose metabolic costs on ho…
427	exclude_abstract	exclude_abstract		EK	KH		exclude_abstract				WoS_Scopus											Schaefer, JA; Mahoney, SP; Weir, JN; Luther, JG; Soulliere, CE	2016	Decades of habitat use reveal food limitation of Newfoundland caribou	JOURNAL OF MAMMALOGY	97	2	386	393	10.1093/jmammal/gyv184	Identifying limiting factors is fundamental to understanding and conserving mammals, yet it often requires long-term data for long-lived species. Numerical changes of migratory caribou (Rangifer tarandus), for example, may unfold over decades, but few studies have examined habitat use at similar timeframes. We analyzed multiple decades of habitat use by caribou in Newfoundland, Canada, coincident…
428	include	exclude_title		EK	KH		exclude_full_text				WoS_Scopus	yes	no	NA	exclude_full_text	Literature review and metanalysis	no_outcome_data	JM	no	RB	exclude_full_text	Schweizer, D; Jones, HP; Holmes, ND	2016	Literature Review and Meta-Analysis of Vegetation Responses to Goat and European Rabbit Eradications on Islands	PACIFIC SCIENCE	70	1	55	71	10.2984/70.1.5	Introduced goats and European rabbits have caused devastating effects on island vegetation, and many successful efforts to eradicate these introduced animals have taken place mainly since the 1950s, Yet, a comprehensive review of vegetation response to goat and rabbit eradications is lacking. We conducted a literature search for articles on vegetation assessments before and after eradications. We…
429	exclude_abstract	exclude_abstract		EK	KH		exclude_abstract				WoS_Scopus											Sedinger, JS; Nicolai, CA; VanDellen, AW; Leach, AG; Wilson, HM; Anthony, RM	2016	Predation and reduced grazing interact to reduce recruitment and population growth in Black Brant	CONDOR	118	2	433	444	10.1650/CONDOR-15-109.1	Dynamics of avian populations may be governed by a complex interaction between immediate effects of predation and longer-term trophic feedbacks between individuals and their foods. We used a long-term study of uniquely marked Black Brant geese (Branta bernicla nigricans) to estimate recruitment into the breeding population. We related recruitment to nest success, which directly affects recruitmen…
430	exclude_title	exclude_title		EK	KH		exclude_title			500	WoS_Scopus											Selyutina, IY; Zibzeev, EG	2016	Ontogenetic structure and vitality of the cenopopulations of Oxytropis sulphurea (Fisch ex DC.) Ledeb. in different ecocenotic conditions of Rudny Altai and the Saur Ridge	CONTEMPORARY PROBLEMS OF ECOLOGY	9	3	355	365	10.1134/S1995425516030148	This article presents the results of an analysis of ontogenetic and vitality structure of seven cenopopulations of Oxytropis sulphurea (Fisch. ex DC.) Ledeb. in the high-altitude conditions of Rydny Altai (Ivanovsky and Prohodnoi ridges) and the Saur Ridge. In the study of the demographic structure it has been determined that most populations from undisturbed habitats are characterized by left-si…
431	exclude_title	exclude_title		EK	KH		exclude_title				WoS_Scopus											Shen, Y; Fichot, CG; Liang, SK; Benner, R	2016	Biological hot spots and the accumulation of marine dissolved organic matter in a highly productive ocean margin	LIMNOLOGY AND OCEANOGRAPHY	61	4	1287	1300	10.1002/lno.10290	Concentrations of dissolved organic carbon (DOC) and major biochemicals (amino acids and carbohydrates) were measured during five cruises (2009-2010) to the Louisiana margin in the northern Gulf of Mexico. Concentrations of amino acids and carbohydrates were elevated at mid-salinities and were indicative of plankton production of dissolved organic matter (DOM) in surface waters. Hot spots of two …
432	exclude_title	exclude_title		EK	KH		exclude_title				WoS_Scopus											Simo-Matchim, AG; Gosselin, M; Blais, M; Gratton, Y; Tremblay, JE	2016	Seasonal variations of phytoplankton dynamics in Nunatsiavut fjords (Labrador, Canada) and their relationships with environmental conditions	JOURNAL OF MARINE SYSTEMS	156		56	75	10.1016/j.jmarsys.2015.11.007	We assessed phytoplankton dynamics and its environmental control in four Labrador fjords (Nachvak, Saglek, Okak, and Anaktalak) during summer, early fall and late fall. Primary production and chlorophyll a (chl a) biomass were measured at seven optical depths, including the depth of subsurface chl a maximum (SCM). Phytoplankton abundance, size structure and taxonomy were determined at the SCM. Pr…
433	exclude_title	exclude_title		EK	KH		exclude_title			503	WoS_Scopus											Sokolov, AA; Sokolova, NA; Ims, RA; Brucker, L; Ehrich, D	2016	Emergent Rainy Winter Warm Spells May Promote Boreal Predator Expansion into the Arctic	ARCTIC	69	2	121	129	10.14430/arctic4559	Climate change has been characterized as the most serious threat to Arctic biodiversity. In addition to gradual changes such as climate warming, extreme weather events, such as melting temperatures in winter and rain on snow, can have profound consequences for ecosystems. Rain-on-snow events lead to the formation of ice layers in the snow pack, which can restrict access to forage plants and cause…
434	exclude_title	exclude_title		EK	KH		exclude_title				WoS_Scopus											Song, HJ; Kang, JJ; Kim, BK; Joo, H; Yang, EJ; Park, J; Lee, SH; Lee, SH	2016	High protein production of phytoplankton in the Amundsen Sea	DEEP-SEA RESEARCH PART II-TOPICAL STUDIES IN OCEANOGRAPHY	123		50	57	10.1016/j.dsr2.2015.07.015	The Amundsen Sea polynya is one of the largest and most productive polynyas in the Southern Ocean and has recently experienced a rapid change in sea ice coverage. However, very little is known about current physiological status of phytoplankton and its quality as food for pelagic herbivores and consequently higher trophic levels in the Amundsen Sea. Using a C-13 isotope tracer technique, macromol…
435	exclude_title	exclude_title		EK	KH		exclude_title				WoS_Scopus											Stecher, A; Neuhaus, S; Lange, B; Frickenhaus, S; Beszteri, B; Kroth, PG; Valentin, K	2016	rRNA and rDNA based assessment of sea ice protist biodiversity from the central Arctic Ocean	EUROPEAN JOURNAL OF PHYCOLOGY	51	1	31	46	10.1080/09670262.2015.1077395	Sea ice is a large and diverse ecosystem contributing significantly to primary production in ice-covered regions. In the Arctic Ocean, sea ice consists of mixed multi-year ice (MYI), often several metres thick, and thinner first-year ice (FYI). Current global warming is most severe in Arctic regions; as a consequence, summer sea ice cover is decreasing and MYI is disappearing at an alarming rate.…
436	include	include		EK	KH		exclude_site_text	site is in central Mexico			WoS_Scopus	yes	no	exclude_site_text				JM	no			Suarez-Pina, J; Rueda-Almazan, JE; Ayestaran, LM; Alcala, RE	2016	Effect of light environment on intra-specific variation in herbivory in the carnivorous plant Pinguicula moranensis (Lentibulariaceae)	JOURNAL OF PLANT INTERACTIONS	11	1	146	151	10.1080/17429145.2016.1231851	Identifying the factors that affect a plant's probability of being found and damaged by herbivores has been a central topic in the study of herbivory. Although herbivory could have important negative consequences on carnivorous plants, their interaction with herbivores remains largely unexplored. We evaluated the effect of spatial variation in light environment (sunny, shade and full-shade sites)…
437	exclude_title	exclude_title		EK	KH		exclude_title				WoS_Scopus											Taipale, SJ; Galloway, AWE; Aalto, SL; Kahilainen, KK; Strandberg, U; Kankaala, P	2016	Terrestrial carbohydrates support freshwater zooplankton during phytoplankton deficiency	SCIENTIFIC REPORTS	6				10.1038/srep30897	Freshwater food webs can be partly supported by terrestrial primary production, often deriving from plant litter of surrounding catchment vegetation. Although consisting mainly of poorly bioavailable lignin, with low protein and lipid content, the carbohydrates from fallen tree leaves and shoreline vegetation may be utilized by aquatic consumers. Here we show that during phytoplankton deficiency,…
438	include	exclude_abstract		EK	KH		exclude_full_text	All sites can be included		505	WoS_Scopus	yes	yes	include	exclude_full_text	herbivore signs on plants observed, but no comparison between herbivore levels (i.e. lack of relevant comparator)	no_comparator	ICB, EMS	yes	RB	exclude_full_text	Tape, KD; Christie, K; Carroll, G; O'Donnell, JA	2016	Novel wildlife in the Arctic: the influence of changing riparian ecosystems and shrub habitat expansion on snowshoe hares	GLOBAL CHANGE BIOLOGY	22	1	208	219	10.1111/gcb.13058	Warming during the 20th century has changed the arctic landscape, including aspects of the hydrology, vegetation, permafrost, and glaciers, but effects on wildlife have been difficult to detect. The primary aim of this study is to examine the physical and biological processes contributing to the expanded riparian habitat and range of snowshoe hares (Lepus americanus) in northern Alaska. We explor…
439	include	exclude_abstract		EK	KH		exclude_full_text			506	WoS_Scopus	yes	yes	include	exclude_full_text	not relevant outcome: focuses on the herbivore (habitat suitability for moose, but does not measure their effects on plants)	no_outcome	ICB	no			Tape, KD; Gustine, DD; Ruess, RW; Adams, LG; Clark, JA	2016	Range Expansion of Moose in Arctic Alaska Linked to Warming and Increased Shrub Habitat	PLOS ONE	11	4			10.1371/journal.pone.0152636	Twentieth century warming has increased vegetation productivity and shrub cover across northern tundra and treeline regions, but effects on terrestrial wildlife have not been demonstrated on a comparable scale. During this period, Alaskan moose (Alces alces gigas) extended their range from the boreal forest into tundra riparian shrub habitat; similar extensions have been observed in Canada (A. a.…
440	exclude_title	exclude_title		EK	KH		exclude_title				WoS_Scopus											Tarling, GA; Peck, VL; Ward, P; Ensor, NS; Achterberg, E; Tynan, E; Poulton, AJ; Mitchell, E; Zubkov, MV	2016	Effects of acute ocean acidification on spatially-diverse polar pelagic foodwebs: Insights from on-deck microcosms	DEEP-SEA RESEARCH PART II-TOPICAL STUDIES IN OCEANOGRAPHY	127		75	92	10.1016/j.dsr2.2016.02.008	The polar oceans are experiencing some of the largest levels of ocean acidification (OA) resulting from the uptake of anthropogenic carbon dioxide (CO2). Our understanding of the impacts this is having on polar marine communities is mainly derived from studies of single species in laboratory conditions, while the consequences for food web interactions remain largely unknown. This study carried ou…
441	exclude_title	exclude_title		EK	KH		exclude_title				WoS_Scopus											Taylor, DJ; Ballinger, MJ; Medeiros, AS; Kotov, AA	2016	Climate-associated tundra thaw pond formation and range expansion of boreal zooplankton predators	ECOGRAPHY	39	1	43	53	10.1111/ecog.01514	Most of the freshwater component of the Earth's surface is composed of shallow tundra ponds. These high latitude ecosystems have been exposed to a variety of abiotic disturbances associated with recent environmental change. However, the biological significance of these changes remains poorly understood. Here, we characterize the abiotic disturbance to the shallow tundra ponds of northwest Alaska.…
442	include	include		EK	KH		include				WoS_Scopus	yes	yes	include	include			NY	yes			te Beest, M; Sitters, J; Menard, CB; Olofsson, J	2016	Reindeer grazing increases summer albedo by reducing shrub abundance in Arctic tundra	ENVIRONMENTAL RESEARCH LETTERS	11	12			10.1088/1748-9326/aa5128	Previous studies have shown that climate warming is causing shrub cover to increase at high latitudes. Increased shrub cover generally lowers surface albedo, which results in higher energy absorption and further warming. In parts of Fennoscandia, herbivory is known to control vegetation height and abundance, and thus preventing this positive feedback. Here, we combine field measurements of albedo…
443	exclude_title	exclude_title		EK	KH		exclude_title				WoS_Scopus											Tolvanen, A; Kangas, K	2016	Tourism, biodiversity and protected areas - Review from northern Fennoscandia	JOURNAL OF ENVIRONMENTAL MANAGEMENT	169		58	66	10.1016/j.jenvman.2015.12.011	Tourist numbers in northern Fennoscandia outweigh those in other northern boreal - arctic regions, which creates a specific need to evaluate the impacts of tourism. This review 1) identifies patterns and trends in the vegetation and wildlife of northern Fennoscandian terrestrial ecosystems as a consequence of tourism and recreation, 2) discusses the implications of findings in terms of the intens…
444	exclude_abstract	exclude_abstract		EK	KH		exclude_abstract			507	WoS_Scopus											Tyler, NJC; Gregorini, P; Forchhammer, MC; Stokkan, KA; van Oort, BEH; Hazlerigg, DG	2016	Behavioral Timing without Clockwork: Photoperiod-Dependent Trade-Off between Predation Hazard and Energy Balance in an Arctic Ungulate	JOURNAL OF BIOLOGICAL RHYTHMS	31	5	522	533	10.1177/0748730416662778	Occurrence of 24-h rhythms in species apparently lacking functional molecular clockwork indicates that strong circadian mechanisms are not essential prerequisites of robust timing, and that rhythmical patterns may arise instead as passive responses to periodically changing environmental stimuli. Thus, in a new synthesis of grazing in a ruminant (MINDY), crepuscular peaks of activity emerge from i…
445	exclude_abstract	exclude_abstract		EK	KH		exclude_abstract			508	WoS_Scopus											Unander, S; Pedersen, AO; Soininen, EM; Descamps, S; Hornell-Willebrand, M; Fuglei, E	2016	Populations on the limits: survival of Svalbard rock ptarmigan	JOURNAL OF ORNITHOLOGY	157	2	407	418	10.1007/s10336-015-1282-6	Predictable variation in demographic patterns among populations inhabiting extreme environments can be used to direct common management actions. Ptarmigan and other grouse are ecologically important herbivores in Arctic and alpine areas, but survival estimates are lacking for many harvested populations. This hampers more detailed assessment of how this key determinant of population growth rate is…
446	exclude_abstract	exclude_abstract		EK	KH		exclude_abstract			510	WoS_Scopus											Vikhamar-Schuler, D; Isaksen, K; Haugen, JE; Tommervik, H; Luks, B; Schuler, TV; Bjerke, JW	2016	Changes in Winter Warming Events in the Nordic Arctic Region	JOURNAL OF CLIMATE	29	17	6223	6244	10.1175/JCLI-D-15-0763.1	In recent years extreme winter warming events have been reported in arctic areas. These events are characterized as extraordinarily warm weather episodes, occasionally combined with intense rainfall, causing ecological disturbance and challenges for arctic societies and infrastructure. Ground-ice formation due to winter rain or melting prevents ungulates from grazing, leads to vegetation browning…
447	exclude_title	exclude_title		EK	KH		exclude_title				WoS_Scopus											Virtanen, R; Oksanen, L; Oksanen, T; Cohen, J; Forbes, BC; Johansen, B; Kayhko, J; Olofsson, J; Pulliainen, J; Tommervik, H	2016	Where do the treeless tundra areas of northern highlands fit in the global biome system: toward an ecologically natural subdivision of the tundra biome	ECOLOGY AND EVOLUTION	6	1	143	158	10.1002/ece3.1837	According to some treatises, arctic and alpine sub-biomes are ecologically similar, whereas others find them highly dissimilar. Most peculiarly, large areas of northern tundra highlands fall outside of the two recent subdivisions of the tundra biome. We seek an ecologically natural resolution to this long-standing and far-reaching problem. We studied broad-scale patterns in climate and vegetation…
448	exclude_title	exclude_title		EK	KH		exclude_title				WoS_Scopus											Vonnahme, TR; Devetter, M; Zarsky, JD; Sabacka, M; Elster, J	2016	Controls on microalgal community structures in cryoconite holes upon high-Arctic glaciers, Svalbard	BIOGEOSCIENCES	13	3	659	674	10.5194/bg-13-659-2016	Glaciers are known to harbor surprisingly complex ecosystems. On their surface, distinct cylindrical holes filled with meltwater and sediments are considered hot spots for microbial life. The present paper addresses possible biological interactions within the community of prokaryotic cyanobacteria and eukaryotic microalgae (microalgae) and relations to their potential grazers, such as tardigrades…
449	include	include		EK	KH		exclude_full_text	include 449b,c exclude 449a			WoS_Scopus	yes	yes	include_site_coordinates, see comments	exclude_full_text	measured browsing marks in different habitats but not effects of browsing on plants	no_outcome	ICB	yes			Vowles, T; Molau, U; Lindstein, L; Molau, M; Bjork, RG	2016	The impact of shrub browsing by mountain hare and reindeer in subarctic Sweden	PLANT ECOLOGY & DIVERSITY	9	4	421	428	10.1080/17550874.2016.1264017	Background: Climate warming has been causing an increase in tall shrub cover around the Arctic, however, mammalian herbivory has been shown to inhibit shrub expansion. Though the effect of reindeer (Rangifer tarandus) and many other mammals has been widely studied in this context, the role of the mountain hare (Lepus timidus) in subarctic Scandinavia remains unknown.Aims: To quantify browsing fro…
450	exclude_title	exclude_abstract		EK	KH		exclude_abstract	paleo			WoS_Scopus											Wappler, T; Grimsson, F	2016	Before the 'Big Chill': Patterns of plant-insect associations from the Neogene of Iceland	GLOBAL AND PLANETARY CHANGE	142		73	86	10.1016/j.gloplacha.2016.05.003	Iceland is the only known terrestrial place in the subarctic North Atlantic providing a fairly continuous sedimentary and plant fossil record over the past 15 million years. While the basic palaeobotanical framework of this pattern has been well established during the last decade, less attention has been paid to the abundant insect traces on fossil leaves/leaflets. Here, we assess the diversity a…
451	exclude_title	exclude_abstract		EK	KH		exclude_abstract				WoS_Scopus											Weegman, MD; Bearhop, S; Hilton, GM; Walsh, A; Fox, AD	2016	Conditions during adulthood affect cohort-specific reproductive success in an Arctic-nesting goose population	PEERJ	4				10.7717/peerj.2044	Variation in fitness between individuals in populations may be attributed to differing environmental conditions experienced among birth (or hatch) years (i.e., between cohorts). In this study, we tested whether cohort fitness could also be explained by environmental conditions experienced in years post-hatch, using 736 lifelong resighting histories of Greenland white-fronted geese (Anser albifron…
452	exclude_title	exclude_abstract		EK	KH		exclude_abstract			511	WoS_Scopus											Weegman, MD; Bearhop, S; Hilton, GM; Walsh, AJ; Weegman, KM; Hodgson, DJ; Fox, AD	2016	Should I stay or should I go? Fitness costs and benefits of prolonged parent-offspring and sibling-sibling associations in an Arctic-nesting goose population	OECOLOGIA	181	3	809	817	10.1007/s00442-016-3595-4	Theory predicts persistence of long-term family relationships in vertebrates will occur until perceived fitness costs exceed benefits to either parents or offspring. We examined whether increased breeding probability and survival were associated with prolonged parent-offspring and sibling-sibling relationships in a long-lived Arctic migrant herbivore, the Greenland white-fronted goose (Anser albi…
453	exclude_title	exclude_abstract		EK	KH		exclude_abstract				WoS_Scopus											Wegrzyn, M; Wietrzyk, P; Lisowska, M; Klimek, B; Nicia, P	2016	What influences heavy metals accumulation in arctic lichen Cetrariella delisei in Svalbard?	POLAR SCIENCE	10	4	532	540	10.1016/j.polar.2016.10.002	The main aim of this study was to identify variations in heavy metal concentrations in Cetrariella delisei along a transect from a High Arctic glacier forehead to the shoreline as well as determine the main environmental factors influencing the deposition of heavy metals in arctic lichens. The macrolichen Cetrariella delisei appears to be an interesting alternative to those lichen species used in…
454	exclude_abstract	exclude_title		EK	KH		exclude_abstract			512	WoS_Scopus											Werner, JR; Gillis, EA; Boonstra, R; Krebs, CJ	2016	You can hide but you can't run: apparent competition, predator responses and the decline of Arctic ground squirrels in boreal forests of the southwest Yukon	PEERJ	4				10.7717/peerj.2303	Throughout much of North America's boreal forest, the cyclical fluctuations of snowshoe hare populations (Lepus americanus) may cause other herbivores to become entrained in similar cycles. Alternating apparent competition via prey switching followed by positive indirect effects are the mechanisms behind this interaction. Our purpose is to document a change in the role of indirect interactions be…
455	exclude_title	exclude_title		EK	KH		exclude_title				WoS_Scopus											Weydmann, A; Coelho, NC; Serrao, EA; Burzynski, A; Pearson, GA	2016	Pan-Arctic population of the keystone copepod Calanus glacialis	POLAR BIOLOGY	39	12	2311	2318	10.1007/s00300-016-1898-x	The copepod Calanus glacialis is endemic to the Arctic Ocean and peripheral seas and forms a key component of the Arctic marine ecosystems. It is the major contributor to zooplankton biomass, a predominant grazer, and an important prey for seabirds, and fish. As for a planktonic species, its dispersal is expected to be widespread and mediated by ocean currents. However, complex circulation patter…
456	exclude_title	exclude_abstract		EK	KH		exclude_abstract				WoS_Scopus											Wheeler, JA; Cortes, AJ; Sedlacek, J; Karrenberg, S; van Kleunen, M; Wipf, S; Hoch, G; Bossdorf, O; Rixen, C	2016	The snow and the willows: earlier spring snowmelt reduces performance in the low-lying alpine shrub Salix herbacea	JOURNAL OF ECOLOGY	104	4	1041	1050	10.1111/1365-2745.12579	Current changes in shrub abundance in alpine and arctic tundra ecosystems are primarily driven by climate change. However, while taller shrub communities are expanding, dwarf shrub communities show reductions under climate warming, and the mechanisms driving the latter (such as warming temperatures or accelerated spring snowmelt) may be complex. To determine and disentangle the response of a wide…
457	exclude_title	exclude_abstract		EK	KH		exclude_abstract				WoS_Scopus											Wood, KA; Newth, JL; Hilton, GM; Nolet, BA; Rees, EC	2016	Inter-annual variability and long-term trends in breeding success in a declining population of migratory swans	JOURNAL OF AVIAN BIOLOGY	47	5	597	609	10.1111/jav.00819	Population declines among migratory Arctic-breeding birds are a growing concern for conservationists. To inform the conservation of these declining populations, we need to understand how demographic rates such as breeding success are influenced by combinations of extrinsic and intrinsic factors. In this study we examined inter-annual variation and long-term trends in two aspects of the breeding s…
458	exclude_title	exclude_title		EK	KH		exclude_title				WoS_Scopus											Yamada, Y; Nishida, S; Graeve, M; Kattner, G	2016	Lipid and fatty acid/alcohol compositions of the subarctic copepods Neocalanus cristatus and Eucalanus bungii from various depths in the Oyashio region, western North Pacific	COMPARATIVE BIOCHEMISTRY AND PHYSIOLOGY B-BIOCHEMISTRY & MOLECULAR BIOLOGY	198		57	65	10.1016/j.cbpb.2016.04.003	Lipids of Neocalanus cristatus and Eucalanus bungii (C3 to adults), collected in March, May, and December from various depths (0-2000 m) were studied in the Oyashio region, western North Pacific. Total lipid and wax ester contents of younger N. cristatus stages increased during the development, being higher in May than in March and December. Major fatty acids of younger N. cristatus were 16:0, 20…
459	exclude_title	exclude_title		EK	KH		exclude_title				WoS_Scopus											Yang, EJ; Jiang, Y; Lee, S	2016	Microzooplankton herbivory and community structure in the Amundsen Sea, Antarctica	DEEP-SEA RESEARCH PART II-TOPICAL STUDIES IN OCEANOGRAPHY	123		58	68	10.1016/j.dsr2.2015.06.001	We examined microzooplankton abundance, community structure, and grazing impact on phytoplankton in the Amundsen Sea, Western Antarctica, during the early austral summer from December 2010 to January 2011. Our study area was divided into three regions based on topography, hydrographic properties, and trophic conditions: (1) the Oceanic Zone (OZ), with free sea ice and low phytoplankton biomass do…
460	include	include		EK	KH		exclude_full_text				WoS_Scopus	yes	yes	include	exclude_full_text	lab study with no clear ecological context (material from Kevo and Kiruna, no explanation which environmental conditions re-created in the lab)	no_population	NY, EMS	yes			Yli-Pirila, P; Copolovici, L; Kannaste, A; Noe, S; Blande, JD; Mikkonen, S; Klemola, T; Pulkkinen, J; Virtanen, A; Laaksonen, A; Joutsensaari, J; Niinemets, U; Holopainen, JK	2016	Herbivory by an Outbreaking Moth Increases Emissions of Biogenic Volatiles and Leads to Enhanced Secondary Organic Aerosol Formation Capacity	ENVIRONMENTAL SCIENCE & TECHNOLOGY	50	21	11501	11510	10.1021/acs.est.6b02800	In addition to climate warming, greater herbivore pressure is anticipated to enhance the emissions of climate-relevant biogenic volatile organic compounds (VOCs) from boreal and subarctic forests and promote the formation of secondary aerosols (SOA) in the atmosphere. We evaluated the effects of Epirrita autumnata, an outbreaking geometrid moth, feeding and larval density on herbivore-induced VOC…
461	exclude_title	exclude_title		EK	KH		exclude_title				WoS_Scopus											Yokoi, N; Matsuno, K; Ichinomiya, M; Yamaguchi, A; Nishino, S; Onodera, J; Inoue, J; Kikuchi, T	2016	Short-term changes in a microplankton community in the Chukchi Sea during autumn: consequences of a strong wind event	BIOGEOSCIENCES	13	4	913	923	10.5194/bg-13-913-2016	Recent studies indicate an increase in atmospheric turbulence in the Chukchi Sea due to the recent drastic sea-ice reduction during summer months. The importance of the effects of this atmospheric turbulence on the marine ecosystem in this region, however, is not fully understood. To evaluate the effects of atmospheric turbulence on the marine ecosystem, high-frequency sampling (daily) from five …
462	exclude_title	exclude_abstract		EK	KH		exclude_abstract				WoS_Scopus											Yulianto, R; Xuan, TD; Kawamura, K; Lim, J; Yoshitoshi, R; Fan, XY; Gong, Z	2016	Abundance Frequency of Plant Species as Animal Feeds to Determine Ideal Cattle Grazing	INTERNATIONAL LETTERS OF NATURAL SCIENCES	58		70	76	10.18052/www.scipress.com/ILNS.58.70	The objectives of this study were to determine the dominant frequency of plant species, and provide useful information toward the conservation management of animal feed in grazing areas, Hiroshima, Japan. The numbers of plant species were 32 and 21 in spring and summer, respectively. The appearance frequency of plant species more than 50% in the spring, consist of Veronica arvensis (75.57%), Trif…
463	exclude_title	exclude_title		EK	KH		exclude_title				WoS_Scopus											Zacher, K; Bernard, M; Bartsch, I; Wiencke, C	2016	Survival of early life history stages of Arctic kelps (Kongsfjorden, Svalbard) under multifactorial global change scenarios	POLAR BIOLOGY	39	11	2009	2020	10.1007/s00300-016-1906-1	Kelps (brown algae of the order Laminariales) build highly complex and productive underwater forests and possess microscopic and macroscopic life stages. The microscopic stages (spores, gametophytes, juvenile sporophytes) are usually more sensitive to environmental stressors and may form a bottleneck for the survival of the population. Future Arctic kelp forests will be especially affected by ele…
464	exclude_title	exclude_title		EK	KH		exclude_title			513	WoS_Scopus											Zawierucha, K; Ostrowska, M; Vonnahme, TR; Devetter, M; Nawrot, AP; Lehmann, S; Kolicka, M	2016	Diversity and distribution of Tardigrada in Arctic cryoconite holes	JOURNAL OF LIMNOLOGY	75	3	545	559	10.4081/jlimnol.2016.1453	Despite the fact that glaciers and ice sheets have been monitored for more than a century, knowledge on the glacial biota remains poor. Cryoconite holes are water-filled reservoirs on a glacier's surface and one of the most extreme ecosystems for micro-invertebrates. Tardigrada, also known as water bears, are a common inhabitant of cryoconite holes. In this paper we present novel data on the morp…
465	exclude_title	exclude_title		EK	KH		exclude_title			514	WoS_Scopus											Zielinska, S; Kidawa, D; Stempniewicz, L; Los, M; Los, JM	2016	New Insights into the Microbiota of the Svalbard Reindeer Rangifer tarandus platyrhynchus	FRONTIERS IN MICROBIOLOGY	7				10.3389/fmicb.2016.00170	Svalbard reindeer (Rangifer tarandus platyrhynchus) is a non-migratory subspecies of reindeer inhabiting the high-arctic archipelago of Svalbard. In contrast to other Rangifer tarandus subspecies, Svalbard reindeer graze exclusively on natural sources of food and have no chance of ingestion of any crops. We report the use of a non-invasive method for analysis of fecal microbiome by means of seque…
466	include	include		EK	KH		exclude_full_text				WoS_Scopus	yes	yes	include	exclude_full_text	in forest habitat	no_population	NY, EMS	yes			Zvereva, EL; Hunter, MD; Zverev, V; Kozlov, MV	2016	Factors affecting population dynamics of leaf beetles in a subarctic region: The interplay between climate warming and pollution decline	SCIENCE OF THE TOTAL ENVIRONMENT	566		1277	1288	10.1016/j.scitotenv.2016.05.187	Understanding the mechanisms by which abiotic drivers, such as climate and pollution, influence population dynamics of animals is important for our ability to predict the population trajectories of individual species under different global change scenarios. We monitored four leaf beetle species (Coleoptera: Chrysomelidae) feeding on willows (Salix spp.) in 13 sites along a pollution gradient in s…
467	exclude_title	exclude_title		EK	KH		exclude_title				WoS_Scopus											Zwolicki, A; Zmudczynska-Skarbek, K; Matula, J; Wojtun, B; Stempniewicz, L	2016	Differential Responses of Arctic Vegetation to Nutrient Enrichment by Plankton- and Fish-Eating Colonial Seabirds in Spitsbergen	FRONTIERS IN PLANT SCIENCE	7				10.3389/fpls.2016.01959	The role of seabirds as sea-land biovectors of nutrients is well documented. However, no studies have examined whether and how colonial seabirds that differ in diet may influence terrestrial vegetation. Therefore, the purpose of the study was to describe and compare plant communities located in the vicinity of the two most common types of seabird colonies in Arctic, occupied by piscivorous or pla…
468	include	include		EK	KH		remove_duplicate			345, 3320, 3466	WoS_Scopus											Anderson H.B., Speed J.D.M., Madsen J., Pedersen D.A., Tombre I.M., Van Der Wal R.	2016	Late Snow Melt Moderates Herbivore Disturbance of the Arctic Tundra	Ecoscience	23	2019-02-01	29	39	10.1080/11956860.2016.1212684	Resilience of tundra vegetation to disturbance by herbivores can be low and lead to ecosystem state shifts. Pink-footed geese Anser brachyrhynchus are the most numerous herbivore on Svalbard and disturb vegetation when foraging for below-ground plant biomass (grubbing). We assessed grubbing extent (occurrence of vegetation disturbance) and intensity (proportion of vegetation disturbed) in 2006/07…
469	include	duplicate		EK	KH		remove_duplicate			351	WoS_Scopus											Barrio I.C., Bueno C.G., Hik D.S.	2016	Warming the tundra: Reciprocal responses of invertebrate herbivores and plants	Oikos	125	1	20	28	10.1111/oik.02190	Rapid warming in northern ecosystems is simultaneously influencing plants, herbivores and the interactions among them. Recent studies suggest that herbivory could buffer plant responses to environmental change, but this has only been shown for vertebrate herbivores so far. The role of invertebrate herbivory in tundra ecosystems is often overlooked, but can be relevant in determining the structure…
470	include	include		EK	KH		include			3464	WoS_Scopus	yes	yes	include	include			NY	yes			Baubin C., Ehrich D., Ravolainen V., Sokovina S., Ektova S., Sokolova N., Ims R.A., Sokolov A.	2016	First results from an experiment excluding three sizes classes of herbivores from tundra vegetation in southern yamal, Russia	Czech Polar Reports	6	2	132	140	10.5817/CPR2016-2-12	Plant-herbivore relationships are important for the functioning of tundra ecosystems. Here, we report the first results from an exclosure experiment that, something very few studies have done, separated the impact of three sizes of herbivores (small, medium and large) on nine functional groups of plants in the low arctic tundra of the Yamal Peninsula (Russia). Herbivore faeces counts in the exclo…
471	include	exclude_abstract		EK	KH		include				WoS_Scopus	yes	yes	include	include			NY	yes			Beaulieu F., Cuerrier A., Filion V.J., Saleem A., Arnason J.T.	2016	A gall mite, Aceria rhodiolae (Acari: Eriophyidae), altering the phytochemistry of a medicinal plant, Rhodiola rosea (Crassulaceae), in the Canadian Arctic	Journal of Natural History	50	19-20	1237	1263	10.1080/00222933.2015.1103910	The eriophyid mite Aceria rhodiolae (G. Canestrini) is known to induce galls on the flowers and leaves of roseroot, Rhodiola rosea L., in subarctic and alpine regions of Europe. After discovering galls on the inflorescences of roseroot in Nunavik (Québec), northeastern Canada, we examined the mites extracted from the galls and compared them with specimens of A. rhodiolae from Europe. Through morp…
472	include	duplicate		EK	KH		remove_duplicate			363	WoS_Scopus											Canty R., Ruzzier E., Cronk Q., Percy D.	2016	Salix transect of Europe: Patterns in the most abundant chrysomelid beetle (Coleoptera: Chrysomelidae) herbivores of willow from Greece to Arctic Norway	Biodiversity Data Journal	4	1			10.3897/BDJ.4.e10194	Background Chrysomelid beetles associated with willow (Salix spp.) were surveyed at 41 sites across Europe, from Greece (lat. 38.8 °N) to arctic Norway (lat. 69.7 °N). New information In all, 34 willow-associated chrysomelid species were encountered, of which eight were very abundant. The abundant species were: Crepidodera aurata Marsham, 1802 at 27 sites, Phratora vitellinae (Linnaeus, 1758) at …
473	include	duplicate		EK	KH		remove_duplicate			364	WoS_Scopus											Damgaard C., Raundrup K., Aastrup P., Langen P.L., Feilberg J., Nabe-Nielsen J.	2016	Arctic resilience: No evidence of vegetation change in response to Grazing and Climate Changes in South Greenland	Arctic, Antarctic, and Alpine Research	48	3	531	549	10.1657/AAAR0016-005	Recent studies suggest that climate changes may have a strong impact on the vegetation composition in Arctic ecosystems, causing increasing dominance of woody species. Evidence from short-term studies on the effects of herbivory indicates that this effect may be counteracted by grazing, but it has not yet been studied whether the effect is persistent and general. Here, we present the results from…
474	exclude_title	exclude_title		EK	KH		exclude_title				WoS_Scopus											Drits A.V., Nikishina A.B., Semenova T.N., Sergeeva V.M., Solovyev K.A., Flint M.V.	2016	Spatial distribution and feeding of dominant zooplankton species in the Ob River estuary	Oceanology	56	3	382	394	10.1134/S0001437016030048	The distribution and feeding of dominant mesozooplankton species were studied in the estuary of the Ob River and adjacent inner Kara Sea shelf waters in September 2013. It was shown that the spatial distributions of Cyclops sp., Senecella siberica, Limnocalanus macrurus, Mysis oculata, Drepanopus bungei, Jashnovia tolli and Pseudocalanus sp. are related to the specific characteristics of the hydr…
475	exclude_title	exclude_title		EK	KH		exclude_title				WoS_Scopus											Drits A.V., Pasternak A.F., Nikishina A.B., Semenova T.N., Sergeeva V.M., Polukhin A.A., Flint M.V.	2016	The dominant copepods Senecella siberica and Limnocalanus macrurus in the Ob Estuary: ecology in a high-gradient environment	Polar Biology	39	9	1527	1538	10.1007/s00300-015-1878-6	Intensive transformation and sedimentation of suspended matter from riverine runoff occur in estuarine frontal zones. The mesozooplankton community plays an important role in these processes. In the Ob Estuary, the dominant copepods Limnocalanus macrurus and Senecella siberica form dense local aggregations, but only scarce data on the ecology of these species in the estuarine environment are avai…
476	exclude_title	exclude_title		EK	KH		exclude_title			655	WoS_Scopus											Eisert R.	2016	Antarctic Megafauna: The birds and mammals of Antarctica	Exploring the Last Continent: An Introduction to Antarctica			253	290	10.1007/978-3-319-18947-5_13	The megafauna (Greek ????: great; Latin fauna: animal life) of Antarctica is defined by absence. Two classes of vertebrates, reptiles and amphibians, are missing from the continent and its surrounding waters, and Antarctica has lacked true land vertebrates since dinosaurs last roamed the continent in the late Cretaceous. The ocean is the foundation of all vertebrate life in Antarctica, and none o…
477	exclude_title	exclude_title		EK	KH		remove_duplicate			373	WoS_Scopus											Fiorillo A.R., McCarthy P.J., Flaig P.P.	2016	A multi-disciplinary perspective on habitat preferences among dinosaurs in a Cretaceous Arctic greenhouse world, North Slope, Alaska (Prince Creek Formation: Lower Maastrichtian)	Palaeogeography, Palaeoclimatology, Palaeoecology	441		377	389	10.1016/j.palaeo.2015.07.024	The Prince Creek Formation of northern Alaska is the most abundant source of polar dinosaur remains in the world, and now, corroborating data from this well-studied rock unit allow for making inferences about the paleoecological preferences for these extinct polar animals. The rock unit records high-latitude, alluvial sedimentation and soil formation on a low-gradient, muddy coastal plain. Compou…
478	exclude_title	exclude_title		EK	KH		remove_duplicate			376	WoS_Scopus											Gao Q., Schwartz M.W., Zhu W., Wan Y., Qin X., Ma X., Liu S., Williamson M.A., Peters C.B., Li Y.	2016	Changes in global grassland productivity during 1982 to 2011 attributable to climatic factors	Remote Sensing	8	5			10.3390/rs8050384	Open, Grass- and Forb-Dominated (OGFD) ecosystems, including tundra, tropical grasslands and savanna, provide habitat for both wild and domesticated large ungulate herbivores. These ecosystems exist across a wide temperature gradient from the Arctic regions to the Equator, but are confined to a narrow set of moisture conditions that range from arid deserts to forest-dominated systems. Primary pro…
479	exclude_title	exclude_title		EK	KH		remove_duplicate			377	WoS_Scopus											García-González R., Aldezabal A., Laskurain N.A., Margalida A., Novoa C.	2016	Factors affecting diet variation in the Pyrenean Rock Ptarmigan (Lagopus muta pyrenaica): Conservation implications	PLoS ONE	11	2			10.1371/journal.pone.0148614	The Pyrenean rock ptarmigan (Lagopus muta pyrenaica) lives at one of the southernmost limits of the ptarmigan range. Their small population sizes and the impacts of global changes are limiting factors in the conservation of this threatened subspecies. An effective conservation policy requires precise basic knowledge of a species' food and habitat requirements, information that is practically non-…
480	include	duplicate		EK	KH		remove_duplicate			378	WoS_Scopus											Gharajehdaghipour T., Roth J.D., Fafard P.M., Markham J.H.	2016	Arctic foxes as ecosystem engineers: Increased soil nutrients lead to increased plant productivity on fox dens	Scientific Reports	6				10.1038/srep24020	Top predators can provide fundamental ecosystem services such as nutrient cycling, and their impact can be even greater in environments with low nutrients and productivity, such as Arctic tundra. We estimated the effects of Arctic fox (Vulpes lagopus) denning on soil nutrient dynamics and vegetation production near Churchill, Manitoba in June and August 2014. Soils from fox dens contained higher …
481	exclude_title	exclude_title		EK	KH		exclude_title				WoS_Scopus											Gudmundsson K., Ágústsdóttir K., McGinty N., Magnússon Á., Gudfinnsson H., Marteinsdóttir G.	2016	A regional correction model for satellite surface chlorophyll concentrations, based on measurements from sea water samples collected around Iceland	Methods in Oceanography	17		83	96	10.1016/j.mio.2016.05.004	Near-surface chlorophyll a concentration is a fundamental component of marine ecological processes, and its changes reflect the phytoplankton growth (primary productivity as well as loss due to grazing and sinking) feeding into higher trophic levels. Time series of measurements from several satellite sensors since late 1997 can be used as a proxy of chlorophyll a concentrations after calibrating …
482	exclude_title	exclude_title		EK	KH		exclude_title				WoS_Scopus											Haycox S.	2016	Battleground alaska: Fighting federal power in America’s last wilderness	Battleground Alaska: Fighting Federal Power in America's Last Wilderness			1	263		No American state is more antistatist than Alaska. And no state takes in more federal money per capita, which accounts for a full third of Alaska's economy. This seeming paradox underlies the story Stephen Haycox tells in Battleground Alaska, a history of the fraught dynamic between development and environmental regulation in a state aptly dubbed "The Last Frontier." Examining inconvenient truths…
483	include	include		EK	KH		remove_duplicate	duplicate?		366	WoS_Scopus		yes	include								Herder M.D., Helle S., Niemelä P., Henttonen H., Helle T.	2016	Large Herbivore Grazing Limits Small-Mammal Densities in Finnish Lapland	Annales Botanici Fennici	53	2019-04-03	154	164	10.5735/086.053.0404	Grazing by large mammals can affect small-mammal populations by modifying the ground-layer vegetation, which provides them with food and shelter. The aim of this study was to investigate the impact of semi-domesticated reindeer grazing on smallmammal abundance in boreal forests/subarctic tundra ecosystems in a large-scale exclosure experiment in northernmost Finnish Lapland. In our experiment spa…
484	exclude_title	exclude_title		EK	KH		exclude_title				WoS_Scopus											Hölldobler B.	2016	Foreword	Wood Ant Ecology and Conservation			xiii	xiv	10.1017/CBO9781107261402.001	Ants are everywhere. They are dominant components in much of the terrestrial world as premier soil turners, predators of other arthropods, dispersers of seeds and, in neotropical regions, the attine leafcutter ants must be considered the major herbivores in rainforests and cultivated fields. Approximately 14 000 species of ants are known to science, but the number continues to grow and it is hard…
485	exclude_title	exclude_title		EK	KH		remove_duplicate			386	WoS_Scopus											Honda M.C., Kawakami H., Matsumoto K., Wakita M., Fujiki T., Mino Y., Sukigara C., Kobari T., Uchimiya M., Kaneko R., Saino T.	2016	Comparison of sinking particles in the upper 200 m between subarctic station K2 and subtropical station S1 based on drifting sediment trap experiments	Journal of Oceanography	72	3	373	386	10.1007/s10872-015-0280-x	Drifting sediment trap experiments were conducted during various seasons to elucidate the characteristics of particles sinking through the upper 200 m of the water column in the western Pacific at subarctic station K2 and subtropical station S1. The sinking particle flux increased when primary productivity was high at each station, during June–July at K2 and during February at S1. Biogenic opal (…
486	exclude_title	exclude_title		EK	KH		remove_duplicate			387	WoS_Scopus											Jalkanen R.	2016	Synthesis and new observations on needle pathogens of larch in Northern Finland	Forests	7	1	1	13	10.3390/f7010025	Needle pathogens of larch (Larix spp.) in the Nordic countries are under-studied. Their incidence in Finland tends to be low and local, and this may be a function of enemy release, since species of larch were introduced to the region. Here, the ecology and incidence of larch needle pathogens and the abiotic factors that also affect larch in northern Finland are reviewed. Field observations and re…
487	exclude_title	exclude_title		EK	KH		remove_duplicate			393	WoS_Scopus											Kopylov A.I., Sazhin A.F., Zabotkina E.A., Romanenko A.V., Romanova N.D., Makarevich P.R., Wenger M.P.	2016	Viruses, bacteria, and heterotrophic nanoflagellates in Laptev Sea plankton	Oceanology	56	6	789	798	10.1134/S0001437016050052	The paper considers the concentrations and functional characteristics of viruses, bacteria, and heterotrophic nanoflagellates determined for the first time in the Laptev Sea in August-September, 2014. The abundance of bacteria, viruses, and heterotrophic nanoflagellates varied from 110.1 × 103 to 828.4 × 103 cells/mL, from 384.2 × 103 to 2932.8 × 103 particles/mL, and from 108 to 651 cells/mL, re…
488	exclude_title	exclude_title		EK	KH		exclude_title				WoS_Scopus											Li S., Wu J.	2016	Community assembly and functional leaf traits mediate precipitation use efficiency of alpine grasslands along environmental gradients on the Tibetan Plateau	PeerJ	2016	11			10.7717/peerj.2680	The alpine grasslands on the Tibetan Plateau are sensitive and vulnerable to climate change. However, it is still unknown how precipitation use efficiency (PUE), the ratio of aboveground net primary productivity (ANPP) to precipitation, is related to community assembly of plant species, functional groups or traits for the Tibetan alpine grasslands along actual environmental gradients. We conducte…
489	exclude_title	exclude_title		EK	KH		exclude_title				WoS_Scopus											Liu S., Zhang F., Du Y., Guo X., Lin L., Li Y., Li Q., Cao G.	2016	Ecosystem carbon storage in alpine grassland on the Qinghai Plateau	PLoS ONE	11	8			10.1371/journal.pone.0160420	The alpine grassland ecosystem can sequester a large quantity of carbon, yet its significance remains controversial owing to large uncertainties in the relative contributions of climate factors and grazing intensity. In this study we surveyed 115 sites to measure ecosystem carbon storage (both biomass and soil) in alpine grassland over the Qinghai Plateau during the peak growing season in 2011 an…
490	include	duplicate		EK	KH		remove_duplicate			408	WoS_Scopus											Mosbacher J.B., Kristensen D.K., Michelsen A., Stelvig M., Schmidt N.M.	2016	Quantifying Muskox Plant Biomass Removal and Spatial Relocation of Nitrogen in a High Arctic Tundra Ecosystem	Arctic, Antarctic, and Alpine Research	48	2	229	240	10.1657/AAAR0015-034	The muskox (Ovibos moschatus), a key species in the arctic tundra, is the only large-bodied herbivore in Northeast Greenland. Here, we quantify the biomass removal and fecal deposition by muskoxen during the snow-free period in the years 1996 to 2013 in the high arctic tundra ecosystem at Zackenberg, Northeast Greenland. We show that despite high densities, muskoxen removed only 0.17% and 0.04% o…
491	exclude_title	exclude_title		EK	KH		exclude_title				WoS_Scopus											Norderhaug K.M., Anglès d’Auriac M.B., Fagerli C.W., Gundersen H., Christie H., Dahl K., Hobæk A.	2016	Genetic diversity of the NE Atlantic sea urchin Strongylocentrotus droebachiensis unveils chaotic genetic patchiness possibly linked to local selective pressure	Marine Biology	163	2	1	13	10.1007/s00227-015-2801-y	We compared the genetic differentiation in the green sea urchin Strongylocentrotus droebachiensis from discrete populations on the NE Atlantic coast. By using eight recently developed microsatellite markers, genetic structure was compared between populations from the Danish Strait in the south to the Barents Sea in the north (56–79°N). Urchins are spread by pelagic larvae and may be transported l…
492	include	exclude_abstract		EK	KH		remove_duplicate	include 492a,b,c,d exclude 492e,f			WoS_Scopus	yes	yes	include_site_coordinates, see comments	exclude_full_text	DUPLICATE: the study uses the same primary dataset for vegetation as study ID=411 (they add other data on habitat selection by GPS-collared reindeer, but the dataset on the plant-herbivore interaction is the same)	remove_duplicate	ICB	no			Pape R., Löffler J.	2016	Broad-scale assumptions on available pasture resources and reindeer’s habitat preferences shown to be decoupled from ecological reality of arctic-alpine landscapes	Erdkunde	70	2	169	192	10.3112/erdkunde.2016.02.05	Today’s overall challenges of reindeer pastoralism, i.e., pasture degradation, climate change, conflicting land use, and predation as well as the underlying meshwork of ecology, socio-economy, culture, and politics requires further research. Overutilization of pastures, reinforced by their general loss has led to a decrease in body weight of reindeer, higher mortality, and lower reproduction in p…
493	exclude_title	exclude_title		EK	KH		remove_duplicate			412	WoS_Scopus											Parsa A., Smith D.	2016	Remote sensing of sea ice using Co- and cross-polarization measurements with Shipborne radar	International Journal of Offshore and Polar Engineering	26	4	321	326	10.17736/ijope.2016.aj06	The ability of cross-polarized X-band radar to differentiate different ice states, including new ice, nilas, young ice (including grey ice and grey-white ice), and thin first-year ice, is investigated. Cross-polarized X-band radar is employed on the Canadian Coast Guard Ship (CCGS) Henry Larsen, which is capable of measuring the depolarization characteristics of sea ice. The CCGS Henry Larsen rec…
494	exclude_title	exclude_title		EK	KH		exclude_title				WoS_Scopus											Paulsen M.L., Doré H., Garczarek L., Seuthe L., Müller O., Sandaa R.-A., Bratbak G., Larsen A.	2016	Synechococcus in the Atlantic Gateway to the Arctic Ocean	Frontiers in Marine Science	3	OCT			10.3389/fmars.2016.00191	Increasing temperatures, with pronounced effects at high latitudes, have raised questions about potential changes in species composition, as well as possible increased importance of small-celled phytoplankton in marine systems. In this study, we mapped out one of the smallest and globally most widespread primary producers, the picocyanobacterium Synechococcus, within the Atlantic inflow to the Ar…
495	include	duplicate		EK	KH		remove_duplicate			420	WoS_Scopus											Ricca M.A., Miles A.K., Van Vuren D.H., Eviner V.T.	2016	Impacts of introduced rangifer on ecosystem processes of maritime tundra on subarctic islands	Ecosphere	7	3			10.1002/ecs2.1219	Introductions of mammalian herbivores to remote islands without predators provide a natural experiment to ask how temporal and spatial variation in herbivory intensity alter feedbacks between plant and soil processes. We investigated ecosystem effects resulting from introductions of Rangifer tarandus (hereafter "Rangifer") to native mammalian predator- and herbivore-free islands in the Aleutian a…
496	exclude_title	exclude_abstract		EK	KH		exclude_abstract			3366	WoS_Scopus											Ross L.C., Austrheim G., Asheim L.-J., Bjarnason G., Feilberg J., Fosaa A.M., Hester A.J., Holand Ø., Jónsdóttir I.S., Mortensen L.E., Mysterud A., Olsen E., Skonhoft A., Speed J.D.M., Steinheim G., Thompson D.B.A., Thórhallsdóttir A.G.	2016	Sheep grazing in the North Atlantic region: A long-term perspective on environmental sustainability	Ambio	45	5	551	566	10.1007/s13280-016-0771-z	Sheep grazing is an important part of agriculture in the North Atlantic region, defined here as the Faroe Islands, Greenland, Iceland, Norway and Scotland. This process has played a key role in shaping the landscape and biodiversity of the region, sometimes with major environmental consequences, and has also been instrumental in the development of its rural economy and culture. In this review, we…
497	include	co-author		EK	KH		remove_duplicate	duplicate		422	WoS_Scopus											Ruffino L., Oksanen T., Hoset K.S., Tuomi M., Oksanen L., Korpimäki E., Bugli A., Hobson K.A., Johansen B., Mäkynen A.	2016	Predator–rodent–plant interactions along a coast–inland gradient in Fennoscandian tundra	Ecography	39	9	871	883	10.1111/ecog.01758	Spatial variation in the strength of trophic cascades in arctic tundra has been related to flows of subsidies across ecosystem boundaries. Here, we ask whether the input of marine subsidies in tundra systems would cause spatial variation in the strength of rodent–plant interactions between coastal areas, where predators have access to marine-derived resources, and non-subsidized inland areas of n…
498	include	duplicate		EK	KH		remove_duplicate			424	WoS_Scopus											Saccone P., Virtanen R.	2016	Extrapolating multi-decadal plant community changes based on medium-term experiments can be risky: Evidence from high-latitude tundra	Oikos	125	1	76	85	10.1111/oik.02399	For most experimental studies the short-term responses to manipulation often differ from the long-term changes in the community composition, dynamics or functioning. Such discrepancy limits the translation of experimental results into key ecological topics such as global environmental change. Here we analyzed plant community dynamics from a 23-year transplant experiment in the Fennoscandian mount…
499	exclude_title	duplicate		EK	KH		remove_duplicate			425	WoS_Scopus											Salgado-Flores A., Hagen L.H., Ishaq S.L., Zamanzadeh M., Wright A.-D.G., Pope P.B., Sundset M.A.	2016	Rumen and cecum microbiomes in reindeer (Rangifer tarandus tarandus) are changed in response to a lichen diet and may affect enteric methane emissions	PLoS ONE	11	5			10.1371/journal.pone.0155213	Reindeer (Rangifer tarandus tarandus) are large Holarctic herbivores whose heterogeneous diet has led to the development of a unique gastrointestinal microbiota, essential for the digestion of arctic flora, which may include a large proportion of lichens during winter. Lichens are rich in plant secondary metabolites, which may affect members of the gut microbial consortium, such as the methane-pr…
500	exclude_title	exclude_title		EK	KH		remove_duplicate			430	WoS_Scopus											Selyutina I.Y., Zibzeev E.G.	2016	Ontogenetic structure and vitality of the cenopopulations of Oxytropis sulphurea (Fisch. ex DC.) Ledeb. in different ecocenotic conditions of Rudny Altai and the Saur Ridge	Contemporary Problems of Ecology	9	3	355	365	10.1134/S1995425516030148	This article presents the results of an analysis of ontogenetic and vitality structure of seven cenopopulations of Oxytropis sulphurea (Fisch. ex DC.) Ledeb. in the high-altitude conditions of Rydny Altai (Ivanovsky and Prohodnoi ridges) and the Saur Ridge. In the study of the demographic structure it has been determined that most populations from undisturbed habitats are characterized by left-si…
501	exclude_title	exclude_title		EK	KH		exclude_title				WoS_Scopus											Semeniuk D.M., Bundy R.M., Posacka A.M., Robert M., Barbeau K.A., Maldonado M.T.	2016	Using 67Cu to study the biogeochemical cycling of copper in the Northeast subarctic Pacific Ocean	Frontiers in Marine Science	3	JUN			10.3389/fmars.2016.00078	Microbial copper (Cu) nutrition and dissolved Cu speciation were surveyed along Line P, a coastal to open ocean transect that extends from the coast of British Columbia, Canada, to the high-nutrient-low-chlorophyll (HNLC) zone of the northeast subarctic Pacific Ocean. Steady-state size fractionated Cu uptake rates and Cu:C assimilation ratios were determined at in situ Cu concentrations and speci…
502	exclude_abstract	exclude_title		EK	KH		exclude_abstract				WoS_Scopus											Shariati-Najafabadi M., Darvishzadeh R., Skidmore A.K., Kölzsch A., Exo K.-M., Nolet B.A., Griffin L., Stahl J., Havinga P.J.M., Meratnia N., Toxopeus A.G.	2016	Environmental parameters linked to the last migratory stage of barnacle geese en route to their breeding sites	Animal Behaviour	118		81	95	10.1016/j.anbehav.2016.05.018	The migration timing of birds can be controlled by endogenous parameters. However, little is known about how environmental parameters influence the timing of migration and which have the greatest influence at different stages of migration. In this study we identified the main environmental parameters that correlate with the timing of the last stage of spring migration for the barnacle goose, Bran…
503	exclude_title	exclude_abstract		EK	KH		remove_duplicate			433	WoS_Scopus											Sokolov A.A., Sokolova N.A., Ims R.A., Brucker L., Ehrich D.	2016	Emergent rainy winter warm spells may promote boreal predator expansion into the arctic	Arctic	69	2	121	129	10.14430/arctic4559	Climate change has been characterized as the most serious threat to Arctic biodiversity. In addition to gradual changes such as climate warming, extreme weather events, such as melting temperatures in winter and rain on snow, can have profound consequences for ecosystems. Rain-on-snow events lead to the formation of ice layers in the snow pack, which can restrict access to forage plants and cause…
504	exclude_title	exclude_title		EK	KH		exclude_title				WoS_Scopus											Strang K.M., Armstrong H.A., Harper D.A.T., Trabucho-Alexandre J.P.	2016	The Sirius Passet Lagerstätte: silica death masking opens the window on the earliest matground community of the Cambrian explosion	Lethaia	49	4	631	643	10.1111/let.12174	The Sirius Passet Lagerstätte (SP), Peary Land, North Greenland, occurs in black slates deposited at or just below storm wave base. It represents the earliest Cambrian microbial mat community with exceptional preservation, predating the Burgess Shale by 10 million years. Trilobites from the SP are preserved as complete, three-dimensional, concave hyporelief external moulds and convex epirelief ca…
505	exclude_abstract	duplicate		EK	KH		remove_duplicate			438	WoS_Scopus											Tape K.D., Christie K., Carroll G., O'Donnell J.A.	2016	Novel wildlife in the Arctic: The influence of changing riparian ecosystems and shrub habitat expansion on snowshoe hares	Global Change Biology	22	1	208	219	10.1111/gcb.13058	Warming during the 20th century has changed the arctic landscape, including aspects of the hydrology, vegetation, permafrost, and glaciers, but effects on wildlife have been difficult to detect. The primary aim of this study is to examine the physical and biological processes contributing to the expanded riparian habitat and range of snowshoe hares (Lepus americanus) in northern Alaska. We explor…
506	include	duplicate		EK	KH		remove_duplicate			439	WoS_Scopus											Tape K.D., Gustine D.D., Ruess R.W., Adams L.G., Clark J.A.	2016	Range expansion of moose in arctic Alaska linked to warming and increased shrub habitat	PLoS ONE	11	4			10.1371/journal.pone.0152636	Twentieth century warming has increased vegetation productivity and shrub cover across northern tundra and treeline regions, but effects on terrestrial wildlife have not been demonstrated on a comparable scale. During this period, Alaskan moose (Alces alces gigas) extended their range from the boreal forest into tundra riparian shrub habitat; similar extensions have been observed in Canada (A. a.…
507	exclude_abstract	duplicate		EK	KH		remove_duplicate			444	WoS_Scopus											Tyler N.J.C., Gregorini P., Forchhammer M.C., Stokkan K.-A., Van Oort B.E.H., Hazlerigg D.G.	2016	Behavioral timing without clockwork: Photoperiod-dependent trade-off between predation hazard and energy balance in an arctic ungulate	Journal of Biological Rhythms	31	5	522	533	10.1177/0748730416662778	Occurrence of 24-h rhythms in species apparently lacking functional molecular clockwork indicates that strong circadian mechanisms are not essential prerequisites of robust timing, and that rhythmical patterns may arise instead as passive responses to periodically changing environmental stimuli. Thus, in a new synthesis of grazing in a ruminant (MINDY), crepuscular peaks of activity emerge from i…
508	exclude_abstract	duplicate		EK	KH		remove_duplicate			445	WoS_Scopus											Unander S., Pedersen Å.Ø., Soininen E.M., Descamps S., Hörnell-Willebrand M., Fuglei E.	2016	Populations on the limits: Survival of Svalbard rock ptarmigan	Journal of Ornithology	157	2	407	418	10.1007/s10336-015-1282-6	Predictable variation in demographic patterns among populations inhabiting extreme environments can be used to direct common management actions. Ptarmigan and other grouse are ecologically important herbivores in Arctic and alpine areas, but survival estimates are lacking for many harvested populations. This hampers more detailed assessment of how this key determinant of population growth rate is…
509	exclude_title	exclude_title		EK	KH		exclude_title				WoS_Scopus											van Pelt W.J.J., Kohler J., Liston G.E., Hagen J.O., Luks B., Reijmer C.H., Pohjola V.A.	2016	Multidecadal climate and seasonal snow conditions in Svalbard	Journal of Geophysical Research: Earth Surface	121	11	2100	2117	10.1002/2016JF003999	Svalbard climate is undergoing amplified change with respect to the global mean. Changing climate conditions directly affect the evolution of the seasonal snowpack, through its impact on accumulation, melt, and moisture exchange. We analyze long-term trends and spatial patterns of seasonal snow conditions in Svalbard between 1961 and 2012. Downscaled regional climate model output is used to drive…
510	exclude_title	duplicate		EK	KH		remove_duplicate			446	WoS_Scopus											Vikhamar-Schuler D., Isaksen K., Haugen J.E., Tømmervik H., Luks B., Schuler T.V., Bjerke J.W.	2016	Changes in winter warming events in the nordic arctic region	Journal of Climate	29	17	6223	6244	10.1175/JCLI-D-15-0763.1	In recent years extreme winter warming events have been reported in arctic areas. These events are characterized as extraordinarily warm weather episodes, occasionally combined with intense rainfall, causing ecological disturbance and challenges for arctic societies and infrastructure. Ground-ice formation due to winter rain or melting prevents ungulates from grazing, leads to vegetation browning…
511	exclude_title	duplicate		EK	KH		remove_duplicate			452	WoS_Scopus											Weegman M.D., Bearhop S., Hilton G.M., Walsh A.J., Weegman K.M., Hodgson D.J., Fox A.D.	2016	Should I stay or should I go? Fitness costs and benefits of prolonged parent–offspring and sibling–sibling associations in an Arctic-nesting goose population	Oecologia	181	3	809	817	10.1007/s00442-016-3595-4	Theory predicts persistence of long-term family relationships in vertebrates will occur until perceived fitness costs exceed benefits to either parents or offspring. We examined whether increased breeding probability and survival were associated with prolonged parent–offspring and sibling–sibling relationships in a long-lived Arctic migrant herbivore, the Greenland white-fronted goose (Anser albi…
512	exclude_title	exclude_title		EK	KH		remove_duplicate			454	WoS_Scopus											Werner J.R., Gillis E.A., Boonstra R., Krebs C.J.	2016	You can hide but you can't run: Apparent competition, predator responses and the decline of Arctic ground squirrels in boreal forests of the southwest Yukon	PeerJ	2016	8			10.7717/peerj.2303	Throughout much of North America's boreal forest, the cyclical fluctuations of snowshoe hare populations (Lepus americanus) may cause other herbivores to become entrained in similar cycles. Alternating apparent competition via prey switching followed by positive indirect effects are the mechanisms behind this interaction. Our purpose is to document a change in the role of indirect interactions be…
513	exclude_title	exclude_title		EK	KH		remove_duplicate			464	WoS_Scopus											Zawierucha K., Ostrowska M., Vonnahme T.R., Devetter M., Nawrot A.P., Lehmann S., Kolicka M.	2016	Diversity and distribution of tardigrada in arctic cryoconite holes	Journal of Limnology	75	3	545	559	10.4081/jlimnol.2016.1453	Despite the fact that glaciers and ice sheets have been monitored for more than a century, knowledge on the glacial biota remains poor. Cryoconite holes are water-filled reservoirs on a glacier’s surface and one of the most extreme ecosystems for micro-invertebrates. Tardigrada, also known as water bears, are a common inhabitant of cryoconite holes. In this paper we present novel data on the morp…
514	exclude_title	exclude_title		EK	KH		remove_duplicate			465	WoS_Scopus											Zieli?ska S., Kidawa D., Stempniewicz L., ?os M., ?os J.M.	2016	New insights into the microbiota of the Svalbard reindeer Rangifer tarandus platyrhynchus	Frontiers in Microbiology	7	FEB			10.3389/fmicb.2016.00170	Svalbard reindeer (Rangifer tarandus platyrhynchus) is a non-migratory subspecies of reindeer inhabiting the high-arctic archipelago of Svalbard. In contrast to other Rangifer tarandus subspecies, Svalbard reindeer graze exclusively on natural sources of food and have no chance of ingestion of any crops. We report the use of a non-invasive method for analysis of fecal microbiome by means of seque…
515	include	exclude_abstract		EK	KH		exclude_full_text				WoS_Scopus	yes	yes	include	exclude_full_text	no data on plants or herbivory	no_outcome	NY, EMS	yes			Anderson, HB; Hubner, CE; Speed, JDM; Madsen, J; van der Wal, R	2015	Biding time before breeding: flexible use of the Arctic landscape by migratory geese during spring	POLAR RESEARCH	34				10.3402/polar.v34.26372	Many millions of long-distance migrants use pre-breeding staging sites located adjacent to breeding grounds immediately prior to nesting, presumably to improve body condition and thus reproductive success. However, in highly seasonal landscapes such as the High Arctic, early spring feeding opportunities are limited and time to complete the breeding cycle is short. Hence, a more productive strateg…
516	exclude_abstract	exclude_abstract		EK	KH		exclude_abstract				WoS_Scopus											Anderson, HB; Madsen, J; Fuglei, E; Jensen, GH; Woodin, SJ; van der Wal, R	2015	The dilemma of where to nest: influence of spring snow cover, food proximity and predator abundance on reproductive success of an arctic-breeding migratory herbivore is dependent on nesting habitat choice	POLAR BIOLOGY	38	2	153	162	10.1007/s00300-014-1574-y	Pink-footed geese Anser brachyrhynchus nest in two contrasting but commonly found habitats: steep cliffs and open tundra slopes. In Svalbard, we compared nest densities and nesting success in these two environments over ten breeding seasons to assess the impact of spring snow cover, food availability to nesting adults and arctic fox Vulpes lagopus (main terrestrial predator) abundance. In years w…
517	exclude_title	exclude_title		EK	KH		exclude_title				WoS_Scopus											Andersson, M	2015	Aposematism and crypsis in a rodent: antipredator defence of the Norwegian lemming	BEHAVIORAL ECOLOGY AND SOCIOBIOLOGY	69	4	571	581	10.1007/s00265-014-1868-7	Aposematism is unusual in herbivorous mammals, and exceptions help clarify its ecology and evolution. The Norwegian lemming differs from other rodents in colouration and behaviour. One hypothesis is that its black, yellow and white colours, loud calls and ferocious defence reduce predation by conspicuous aposematism. Another hypothesis is that the colouration is cryptic. These alternatives are te…
518	exclude_title	exclude_abstract		EK	KH		exclude_abstract			648	WoS_Scopus											Barrio, IC; Hik, DS; Liu, Y	2015	Diet breadth of Gynaephora groenlandica (Lepidoptera: Erebidae): is polyphagy greater in alpine versus Arctic populations?	CANADIAN ENTOMOLOGIST	147	2	215	221	10.4039/tce.2014.35	Gynaephora groenlandica (Wocke) (Lepidoptera: Erebidae) is a cold-adapted species, whose life history traits are dictated by cold and short Arctic summers. We used a recently discovered alpine tundra population in southwestern Yukon, Canada to investigate local adaptations to habitats with different environmental conditions (alpine versus Arctic). Using cafeteria-type experiments and field observ…
519	include	exclude_abstract		EK	KH		exclude_full_text				WoS_Scopus	yes	yes	include	exclude_full_text	no data on plants or herbivory	no_outcome	NY, EMS	yes			Barstad, TE; Nilssen, AC	2015	Spring phenology and the response to global warming in gall-inducing sawflies	POLAR BIOLOGY	38	9	1503	1513	10.1007/s00300-015-1712-1	The phenological window of opportunity for mating, oviposition and larval development is an important part in the life cycle of gall-inducing sawflies. Spring temperatures play an essential role in the timing of eclosion and host plant leaf flush, which are evolutionarily synchronized. This study investigates important events in spring phenology and timing of eclosion for three sympatric gall-ind…
520	include	include		EK	KH		include			649	WoS_Scopus	yes	yes	include	include			NY	yes			Barthelemy, H; Stark, S; Olofsson, J	2015	Strong Responses of Subarctic Plant Communities to Long-Term Reindeer Feces Manipulation	ECOSYSTEMS	18	5	740	751	10.1007/s10021-015-9856-y	Deposition of feces is a key mechanism by which herbivores influence soil nutrient cycling and plant production, but the knowledge about its importance for plant production and community structure is still rudimental since experimental evidence is scarce. We thus performed a 7-year long reindeer feces manipulation experiment in two tundra vegetation types with contrasting nutrient availability an…
521	include	exclude_abstract		EK	KH		exclude_full_text	review		954	WoS_Scopus	yes	no	NA	exclude_full_text	review	no_outcome_data	JM	no			Bernes, C; Brathen, KA; Forbes, BC; Speed, JDM; Moen, J	2015	What are the impacts of reindeer/caribou (Rangifer tarandus L.) on arctic and alpine vegetation? A systematic review	ENVIRONMENTAL EVIDENCE	4	1			10.1186/s13750-014-0030-3	Background: The reindeer (or caribou, Rangifer tarandus L.) has a natural range extending over much of Eurasia's and North America's arctic, alpine and boreal zones, yet its impact on vegetation is still unclear. This lack of a common understanding hampers both the management of wild and semi-domesticated reindeer populations and the preservation of biodiversity. To achieve a common platform, we …
522	exclude_title	exclude_title		EK	KH		exclude_title			799	WoS_Scopus											Blachowiak-Samolyk, K; Wiktor, JM; Hegseth, EN; Wold, A; Falk-Petersen, S; Kubiszyn, AM	2015	Winter Tales: the dark side of planktonic life	POLAR BIOLOGY	38	1	23	36	10.1007/s00300-014-1597-4	This paper presents the first comprehensive insight into the structure of planktonic communities, from nanoprotists to mesozooplankton in the waters north of Svalbard during the dark Arctic winter. Our investigations were carried out in two contrasting locations comparing a shallow fjord, Rijpfjorden, and a deep ice-covered region, Sofiadjupet, in January 2012. They revealed low chlorophyll a con…
523	exclude_title	exclude_title		EK	KH		exclude_title				WoS_Scopus											Bluhm, BA; Kosobokova, KN; Carmack, EC	2015	A tale of two basins: An integrated physical and biological perspective of the deep Arctic Ocean	PROGRESS IN OCEANOGRAPHY	139		89	121	10.1016/j.pocean.2015.07.011	This review paper integrates the current knowledge, based on available literature, on the physical and biological conditions of the Amerasian and Eurasian basins (AB, EB) of the deep Arctic Ocean (AO) in a comparative fashion. The present day (Holocene) AO is a mediterranean sea that is roughly half continental shelf and half basin and ridge complex. Even more recently it is roughly two thirds se…
524	exclude_title	exclude_title		EK	KH		exclude_title			650	WoS_Scopus											Bock, N; Anderson, OR	2015	Eukaryotic Microbial Communities Associated with Rock-dwelling Foliose Lichens: A Functional Morphological and Microecological Analysis	ACTA PROTOZOOLOGICA	54	4	265	273	10.4467/16890027AP.15.021.3535	Lichens are widely recognized as important examples of a fungal-algal or fungal-cyanophyte symbiosis; and in some cases they are a major food source for some animal grazers such as caribou (Rangifer tarandus), especially in the Arctic during winter. However, relatively little is known about the ecology of their co-associated bacterial and protistan communities. This is one of the first reports of…
525	include	include		EK	KH		include				WoS_Scopus	yes	yes	include	include			NY	yes			Bokhorst, S; Phoenix, GK; Berg, MP; Callaghan, TV; Kirby-Lambert, C; Bjerke, JW	2015	Climatic and biotic extreme events moderate long-term responses of above- and belowground sub-Arctic heathland communities to climate change	GLOBAL CHANGE BIOLOGY	21	11	4063	4075	10.1111/gcb.13007	Climate change impacts are not uniform across the Arctic region because interacting factors causes large variations in local ecosystem change. Extreme climatic events and population cycles of herbivores occur simultaneously against a background of gradual climate warming trends and can redirect ecosystem change along routes that are difficult to predict. Here, we present the results from sub-Arct…
526	exclude_title	exclude_title		EK	KH		exclude_title			803	WoS_Scopus											Bourassa, M; Burlton, B; Afagh, F; Langlois, R	2015	Exploiting lunisolar perturbations using the grazing method: An orbit control strategy for a satellite in a critically inclined highly eccentric orbit around the Earth	ACTA ASTRONAUTICA	115		71	81	10.1016/j.actaastro.2015.05.007	Lunar and solar perturbations, coupled with the oblateness effects of the Earth, cause large predictable oscillations in the eccentricity and argument of perigee of critically inclined highly eccentric orbits such as Molniya and Tundra orbits. These oscillations can be controlled in an efficient manner using analytically predicted knowledge of the perturbations and by determining the time at whic…
527	exclude_title	exclude_abstract		EK	KH		exclude_abstract	effect on endophytes			WoS_Scopus											Brathen, KA; Jahiri, X; Jusdado, JGH; Soininen, EM; Jensen, JB	2015	Fungal endophyte diversity in tundra grasses increases by grazing	FUNGAL ECOLOGY	17		41	51	10.1016/j.funeco.2015.05.002	Fungal endophytes are species rich and ubiquitous, yet, apart from the genus Epichloe, their ecology is largely unknown. Here we explore how herbivores affect the diversity of fungal endophytes in tundra grasslands. We assess both hyphal morphological and taxonomic diversity in grass individuals. By microscopic examination we identified endophytes to be present in all sampled grass individuals wh…
528	exclude_title	include		EK	KH		include				WoS_Scopus	yes	yes	include	include			NY	yes			Brathen, KA; Ravolainen, VT	2015	Niche construction by growth forms is as strong a predictor of species diversity as environmental gradients	JOURNAL OF ECOLOGY	103	3	701	713	10.1111/1365-2745.12380	We present a conceptual framework that describes how species belonging to a growth form collectively can be niche constructors (i.e. modify niches) and affect species diversity in plant communities. We use an empirical assessment of tundra plant communities to illustrate the framework's utility. In doing so, we make a first investigation of collective niche construction in ecological communities.…
529	exclude_title	exclude_title		EK	KH		exclude_title				WoS_Scopus											Burd, BJ; Thomson, RE	2015	The importance of hydrothermal venting to water-column secondary production in the northeast Pacific	DEEP-SEA RESEARCH PART II-TOPICAL STUDIES IN OCEANOGRAPHY	121		85	94	10.1016/j.dsr2.2015.04.014	The purpose of this study is to show that seafloor hydrothermal venting in the open northeast Pacific Ocean has a marked impact on secondary biomass and production within the overlying water column. Specifically, we use net tows and concurrently measured acoustic backscatter data collected over six summers to examine the effects of hydrothermal venting from the Endeavour Segment of Juan de Fuca R…
530	exclude_title	exclude_title		EK	KH		exclude_title			651	WoS_Scopus											Busch, K; Bauerfeind, E; Nothig, EM	2015	Pteropod sedimentation patterns in different water depths observed with moored sediment traps over a 4-year period at the LTER station HAUSGARTEN in eastern Fram Strait	POLAR BIOLOGY	38	6	845	859	10.1007/s00300-015-1644-9	Pteropods are important organisms in high-latitude ecosystems, and they are expected to severely suffer from climate change in the near future. In this study, sedimentation patterns of two pteropod species, the polar Limacina helicina and the subarctic boreal L. retroversa, are presented. Time series data received by moored sediment traps at the Long-Term Ecological Research (LTER) Observatory HA…
531	exclude_title	include		EK	KH		exclude_site_text	Excluded. Site is in California			WoS_Scopus	yes	no	exclude_site_text				JM	no			Carey, CJ; Beman, JM; Eviner, VT; Malmstrom, CM; Hart, SC	2015	Soil microbial community structure is unaltered by plant invasion, vegetation clipping, and nitrogen fertilization in experimental semi-arid grasslands	FRONTIERS IN MICROBIOLOGY	6				10.3389/fmicb.2015.00466	Global and regional environmental changes often co-occur, creating complex gradients of disturbance on the landscape. Soil microbial communities are an important component of ecosystem response to environmental change, yet little is known about how microbial structure and function respond to multiple disturbances, or whether multiple environmental changes lead to unanticipated interactive effects…
532	exclude_title	exclude_title		EK	KH		exclude_title				WoS_Scopus											Cartier, R; Brisset, E; Pailles, C; Guiter, F; Sylvestre, F; Ruaudel, F; Anthony, EJ; Miramont, C	2015	5000 years of lacustrine ecosystem changes from Lake Petit (Southern Alps, 2200m a.s.l.): Regime shift and resilience of algal communities	HOLOCENE	25	8	1231	1245	10.1177/0959683615580862	Sediments from Lake Petit (2200m a.s.l., Southern Alps) are particularly relevant for analysis of coupled landscape palaeoecology and palaeolimnology. Diatom assemblages, organic matter composition of sediments (total nitrogen and organic carbon) and Pediastrum boryanum concentrations were obtained from a 144-cm-long core, enabling the reconstruction of the aquatic ecosystem over nearly the last …
[truncated: 3,054 more rows]

## Sheet: variable information
Variable information
ID_Eeva	unique ID number for each study
[truncated: 29 more rows]

## Sheet: theses
ID_Eeva	score_1	score_2	score_3	person_1	person_2	person_3	current_score	comments	thesis	affiliation	country	duplicate ID	search_source	pdf_stored	coordinates_stored	coordinate_score	full_text_score	full_text_exclusion_reason	full_text_exclusion	full_text_person	data_coded	Authors	Year	Title	Source.title	Volume	Issue	Page.start	Page.end	DOI	Abstract
[truncated: 39 more rows]

[truncated: 1 more sheets: included articles]
